# Supplementary material for: N-Heterocyclic carbene-catalyzed enantioselective annulation of 2-amino-1H-indoles and bromoenals for the synthesis of chiral 2-aryl-2,3-dihydropyrimido[1,2-a]indol-4 (1H)-ones
Source: Royal Society of Chemistry journal article supplement (doi:10.1039/d3ob01006f), 2023-01-01
Supplement: d3ob01006f1.pdf [file d3ob01006f1.pdf]

*Supporting Information*

***N*-Heterocyclic Carbene-Catalyzed Enantioselective  
Annulation of 2-Amino-1*H*-indoles and Bromoenals for  
Synthesis of Chiral 2-Aryl-2,3-dihydropyrimido[1,2-*a*] indol-  
4 (1*H*)-ones**

Jianbo Zhao,<sup>a</sup> Min Wu,<sup>a</sup> Jiamin Luo,<sup>a</sup> Lei Shi<sup>b</sup> and Hao Li<sup>\*a</sup>

*[a] State Key Laboratory of Bioreactor Engineering, Shanghai Key Laboratory of New Drug Design, and School of Pharmacy, East China University of Science and Technology, 130 Mei-long Road, Shanghai, 200237, China*

*[b] Döhler Food & Beverage Ingredients (Shanghai) Co., Ltd., 739 Shennan Road, Shanghai 201108, China.*

**Table of contents**

|                                                                                             |           |
|---------------------------------------------------------------------------------------------|-----------|
| <b>I. General Information .....</b>                                                         | <b>1</b>  |
| <b>II. General Procedure for the preparation of Substrates .....</b>                        | <b>2</b>  |
| <b>III. General Procedure for Synthesis of 3 and their Characterization Data .....</b>      | <b>7</b>  |
| <b>IV. X-ray crystal structure of (-)3a .....</b>                                           | <b>21</b> |
| <b>V. References .....</b>                                                                  | <b>37</b> |
| <b>VI. <sup>1</sup>H, <sup>13</sup>C, <sup>19</sup>F NMR spectra and HPLC Spectra .....</b> | <b>38</b> |

## 1. General Information

Unless otherwise mentioned, all commercial reagents and solvents were used directly as purchased. Flash chromatography was performed on silica gel (200 - 300 mesh) with petroleum ether/ethyl acetate as the eluent.  $^1\text{H}$ ,  $^{13}\text{C}$ , and  $^{19}\text{F}$ NMR spectra were performed on a 400 MHz NMR or 600 MHz NMR spectrometer. The  $^1\text{H}$  NMR spectra of the compounds were measured at 400 MHz or 600 MHz are internally referenced to residual protic  $\text{CDCl}_3$  ( $\delta$  7.26 ppm) or  $\text{DMSO-}d_6$  ( $\delta$  3.36, 2.50 ppm).  $^{13}\text{C}$  NMR spectra were measured at 151/101 MHz and data are reported referenced to  $\text{CDCl}_3$  ( $\delta$  77.0 ppm, the middle peak) or  $\text{DMSO-}d_6$  ( $\delta$  39.5 ppm).  $^{19}\text{F}$  NMR spectra were measured at 565 MHz. *J* values are given in hertz (Hz).

## 2. Preparation of Substrates

### 2.1 Preparation of 2-amino-1H-indole-3-carbonitrile<sup>1</sup>

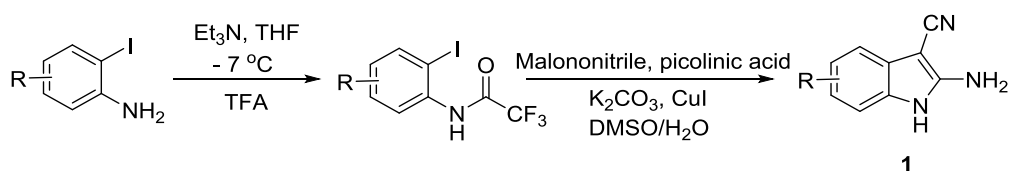

**Step 1:** Corresponding 2-iodoaniline derivative (1.0 mmol) was dissolved in dry THF (5 mL), Et<sub>3</sub>N (1.2 mmol) was added and resulting solution cooled down to -7°C. Trifluoroacetic anhydride (1.2 mmol) dissolved in dry THF was added dropwise within 5 min and then the reaction was allowed to warm up to RT and was stirred overnight. After completion the reaction was diluted with water and the product extracted to EtOAc. Organic layer was washed with brine, dried over Na<sub>2</sub>SO<sub>4</sub> and evaporated to obtain 2,2,2-trifluoro-N-(2-iodophenyl)acetamide as solid, Products were used for the next step without further purification.

**Step 2:** Corresponding 2,2,2-trifluoro-N-(2-iodophenyl)acetamide derivative (1.0 equiv), malononitrile (1.2 equiv), K<sub>2</sub>CO<sub>3</sub> (2.0 equiv) and L-proline (0.2 equiv) were dispersed in DMSO/H<sub>2</sub>O (1:1, 2 mL/mmol) and stirred for 15 min at RT. Then CuI (0.1 equiv) was added and the reaction mixture stirred at 60°C overnight. After completion the reaction mixture was filtrated and filter washed extensively with MeOH. The filtrate was concentrated and resulting liquid diluted with water and extracted with Et<sub>2</sub>O. Organic layer was washed with brine, dried over Na<sub>2</sub>SO<sub>4</sub> and evaporated to obtain 2-amino-1H-indole-3-carbonitrile as beige solid. In case of 2-amino-1H-indole-3-carbonitrile, the crude product was purified by flash chromatography (hex/EtOAc) to afford product.

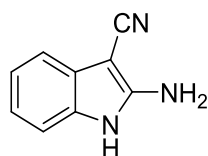

**2-Amino-1H-indole-3-carbonitrile (1a).**<sup>2</sup> (yield: 65%). Brown solid, purified by flash column chromatography (eluent: Petroleum ether/EtOAc = 1/1). <sup>1</sup>H NMR (400 MHz, DMSO-*d*<sub>6</sub>) δ 10.71 (s, 1H), 7.14 (d, *J* = 8.0 Hz, 2H), 6.99 - 6.89 (m, 2H), 6.75 (s, 2H). <sup>13</sup>C NMR (151 MHz, DMSO-*d*<sub>6</sub>) δ 154.3, 132.6, 128.7, 121.0, 120.1, 118.4, 115.6, 110.7, 62.1.

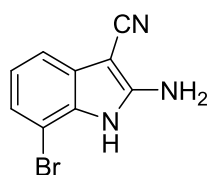

**2-Amino-7-bromo-1H-indole-3-carbonitrile (1b).** (yield: 54%). Brown solid, purified by flash column chromatography (eluent: Petroleum ether/EtOAc = 1/1). <sup>1</sup>H NMR (400 MHz, DMSO-*d*<sub>6</sub>) δ 10.97 (s, 1H), 7.20 (d, *J* = 7.6 Hz, 1H), 7.14 (d, *J* = 7.6 Hz, 1H), 6.97 (t, *J* = 7.6 Hz, 1H), 6.74 (s, 2H). <sup>13</sup>C NMR (151 MHz, DMSO-*d*<sub>6</sub>) δ 154.7, 130.7, 130.3, 122.7, 122.5, 117.5, 115.0, 102.9, 63.3. HRMS (ESI, *m/z*) calcd for C<sub>9</sub>H<sub>6</sub>N<sub>3</sub>BrNa [M + Na]<sup>+</sup>: 257.9643, found: 257.9646.

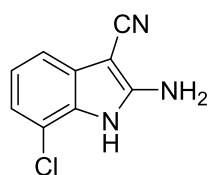

**2-Amino-7-chloro-1H-indole-3-carbonitrile (1c).** (yield: 60%). Brown solid, purified by flash column chromatography (eluent: Petroleum ether/EtOAc = 1/1). <sup>1</sup>H NMR (400 MHz, DMSO-*d*<sub>6</sub>) δ 11.15 (s, 1H), 7.15 (dd, *J* = 6.4, 2.0 Hz, 1H), 7.01 (m, 2H), 6.75 (s, 2H). <sup>13</sup>C NMR (151 MHz, DMSO-*d*<sub>6</sub>) δ 154.8, 130.5, 129.1, 122.3, 119.7, 117.5, 114.8, 114.6, 63.2. HRMS (ESI, *m/z*) calcd for C<sub>9</sub>H<sub>7</sub>N<sub>3</sub>Cl [M + H]<sup>+</sup>: 192.0328, found: 192.0327.



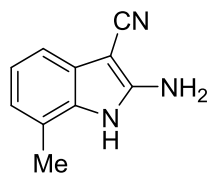

**2-Amino-7-methyl-1H-indole-3-carbonitrile (1d).** (yield: 66%). Brown solid, purified by flash column chromatography (eluent: Petroleum ether/EtOAc = 1/1).  $^1\text{H}$  NMR (400 MHz, DMSO- $d_6$ )  $\delta$  10.75 (s, 1H), 6.98 (d,  $J$  = 7.6 Hz, 1H), 6.88 (t,  $J$  = 7.6 Hz, 1H), 6.73 (d,  $J$  = 7.2 Hz, 1H), 6.49 (s, 2H), 2.33 (s, 3H).  $^{13}\text{C}$  NMR (151 MHz, DMSO- $d_6$ )  $\delta$  154.2, 131.4, 128.4, 121.4, 121.2, 119.7, 118.4, 113.5, 62.6, 16.9. HRMS (ESI,  $m/z$ ) calcd for  $\text{C}_{10}\text{H}_9\text{N}_3\text{Na}$  [ $\text{M} + \text{Na}$ ] $^+$ : 194.0694, found: 194.0695.

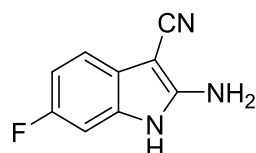

**2-Amino-6-fluoro-1H-indole-3-carbonitrile (1e).** (yield: 51%). Brown solid, purified by flash column chromatography (eluent: Petroleum ether/EtOAc = 1/1).  $^1\text{H}$  NMR (400 MHz, DMSO- $d_6$ )  $\delta$  10.77 (s, 1H), 7.08 (dd,  $J$  = 8.4, 5.2 Hz, 1H), 6.97 (dd,  $J$  = 9.6, 2.4 Hz, 1H), 6.83 - 6.77 (m, 3H).  $^{13}\text{C}$  NMR (151 MHz, DMSO- $d_6$ )  $\delta$  158.8, 156.1 (d,  $J$  = 356.7 Hz), 132.7 (d,  $J$  = 12.5 Hz), 125.0, 118.0, 115.9 (d,  $J$  = 9.8 Hz), 108.1 (d,  $J$  = 23.6 Hz), 98.2, 98.0, 61.6.  $^{19}\text{F}$  NMR (565 MHz, DMSO- $d_6$ )  $\delta$  -123.8 (td,  $J$  = 10.2, 5.1 Hz). HRMS (ESI,  $m/z$ ) calcd for  $\text{C}_9\text{H}_6\text{N}_3\text{FNa}$  [ $\text{M} + \text{Na}$ ] $^+$ : 198.0443, found: 198.0440.

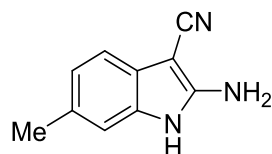

**2-Amino-6-methyl-1H-indole-3-carbonitrile (1f).** (yield: 47%). Brown solid, purified by flash column chromatography (eluent: Petroleum ether/EtOAc = 1/1).  $^1\text{H}$  NMR (400 MHz, DMSO- $d_6$ )  $\delta$  10.59 (s, 1H), 7.02 (d,  $J$  = 7.6 Hz, 1H), 6.95 (s, 1H), 6.79 (d,  $J$  = 8.0 Hz, 1H), 6.63 (s, 2H), 2.30 (s, 3H).  $^{13}\text{C}$  NMR (151 MHz, DMSO- $d_6$ )  $\delta$  154.1, 132.9, 129.1, 126.2, 122.1, 118.6, 115.4, 111.0, 61.8, 21.6. HRMS (ESI,  $m/z$ ) calcd for  $\text{C}_{10}\text{H}_9\text{N}_3\text{Na}$  [ $\text{M} + \text{Na}$ ] $^+$ : 194.0694, found: 194.0698.

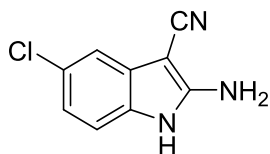

**2-Amino-5-chloro-1H-indole-3-carbonitrile (1g).** (yield: 42%). Brown solid, purified by flash column chromatography (eluent: Petroleum ether/EtOAc = 1/1).  $^1\text{H}$  NMR (400 MHz,  $\text{DMSO-}d_6$ )  $\delta$  10.85 (s, 1H), 7.11 (d,  $J = 8.4$  Hz, 1H), 7.08 (d,  $J = 2.0$  Hz, 1H), 6.95 (s, 2H), 6.90 (dd,  $J = 8.4, 2.0$  Hz, 1H).  $^{13}\text{C}$  NMR (151 MHz,  $\text{DMSO-}d_6$ )  $\delta$  155.1, 131.3, 130.3, 125.6, 119.7, 117.6, 114.7, 111.9, 62.1. HRMS (ESI,  $m/z$ ) calcd for  $\text{C}_9\text{H}_7\text{N}_3\text{Cl}$   $[\text{M} + \text{H}]^+$ : 192.0328, found: 192.0325.

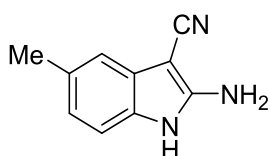

**2-Amino-5-methyl-1H-indole-3-carbonitrile (1h).** (yield: 62%). Brown solid, purified by flash column chromatography (eluent: Petroleum ether/EtOAc = 1/1).  $^1\text{H}$  NMR (400 MHz,  $\text{DMSO-}d_6$ )  $\delta$  10.55 (s, 1H), 7.00 (d,  $J = 7.6$  Hz, 1H), 6.93 (d,  $J = 1.6$  Hz, 1H), 6.71 (dd,  $J = 8.0, 1.6$  Hz, 1H), 6.65 (s, 2H), 2.30 (s, 3H).  $^{13}\text{C}$  NMR (151 MHz,  $\text{DMSO-}d_6$ )  $\delta$  154.3, 130.7, 129.7, 129.0, 121.1, 118.4, 115.8, 110.3, 61.8, 21.6. HRMS (ESI,  $m/z$ ) calcd for  $\text{C}_{10}\text{H}_9\text{N}_3\text{Na}$   $[\text{M} + \text{Na}]^+$ : 194.0694, found: 194.0689.

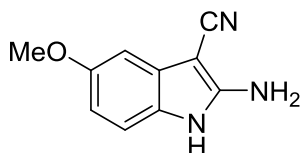

**2-Amino-5-methoxy-1H-indole-3-carbonitrile (1i).** (yield: 45%). Brown solid, purified by flash column chromatography (eluent: Petroleum ether/EtOAc = 1/1).  $^1\text{H}$  NMR (600 MHz,  $\text{DMSO-}d_6$ )  $\delta$  10.50 (s, 1H), 7.01 (d,  $J = 8.4$  Hz, 1H), 6.67 (s, 1H), 6.67 (s, 2H), 6.50 (dd,  $J = 8.4, 2.4$  Hz, 1H), 3.73 (s, 3H).  $^{13}\text{C}$  NMR (151 MHz,  $\text{DMSO-}d_6$ )  $\delta$  155.1, 154.6, 129.6, 127.0, 118.4, 111.2, 107.8, 99.8, 62.6, 55.7. HRMS (ESI,  $m/z$ ) calcd for  $\text{C}_{10}\text{H}_9\text{N}_3\text{ONa}$   $[\text{M} + \text{Na}]^+$ : 210.0643, found: 210.0641.

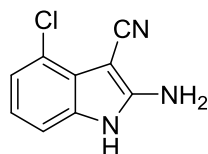

**2-Amino-4-chloro-1H-indole-3-carbonitrile (1j).** (yield: 63%). Brown solid, purified by flash column chromatography (eluent: Petroleum ether/EtOAc = 1/1).  $^1\text{H}$  NMR (400 MHz, DMSO- $d_6$ )  $\delta$  11.01 (s, 1H), 7.09 (dd,  $J = 7.7, 1.1$  Hz, 1H), 6.95 (dd,  $J = 7.9, 1.0$  Hz, 1H), 6.93 (s, 2H), 6.88 (t,  $J = 7.8$  Hz, 1H).  $^{13}\text{C}$  NMR (151 MHz, DMSO- $d_6$ )  $\delta$  155.6, 133.9, 125.3, 121.4, 121.2, 120.9, 118.0, 109.6, 61.8. HRMS (ESI,  $m/z$ ) calcd for  $\text{C}_9\text{H}_7\text{N}_3\text{Cl}$  [ $\text{M} + \text{H}$ ] $^+$ : 192.0328, found: 192.0325.

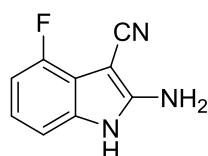

**2-Amino-4-fluoro-1H-indole-3-carbonitrile (1k).** (yield: 54%). Brown solid, purified by flash column chromatography (eluent: Petroleum ether/EtOAc = 1/1).  $^1\text{H}$  NMR (400 MHz, DMSO- $d_6$ )  $\delta$  10.97 (s, 1H), 6.98 (d,  $J = 7.6$  Hz, 1H), 6.92 - 6.83 (m, 3H), 6.78 - 6.73 (m, 1H).  $^{13}\text{C}$  NMR (151 MHz, DMSO- $d_6$ )  $\delta$  154.8, 153.8 (d,  $J = 239.8$  Hz), 135.2 (d,  $J = 11.0$  Hz), 120.6 (d,  $J = 7.0$  Hz), 118.1, 115.9 (d,  $J = 19.5$  Hz), 107.3 (d,  $J = 2.4$  Hz), 106.7 (d,  $J = 19.0$  Hz), 59.0. HRMS (ESI,  $m/z$ ) calcd for  $\text{C}_9\text{H}_6\text{N}_3\text{NaF}$  [ $\text{M} + \text{Na}$ ] $^+$ : 198.0443, found: 198.0439.

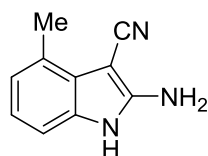

**2-Amino-4-methyl-1H-indole-3-carbonitrile (1l).** (yield: 48%). Brown solid, purified by flash column chromatography (eluent: Petroleum ether/EtOAc = 1/1).  $^1\text{H}$  NMR (400 MHz, DMSO- $d_6$ )  $\delta$  10.68 (s, 1H), 6.97 (d,  $J = 7.6$  Hz, 1H), 6.80 (t,  $J = 7.6$  Hz, 1H), 6.70 (d,  $J = 7.2$  Hz, 1H), 6.62 (s, 2H), 2.48 (s, 3H).  $^{13}\text{C}$  NMR (151 MHz, DMSO- $d_6$ )  $\delta$  154.8, 132.3, 126.4, 126.1, 122.1, 120.2, 119.9, 108.6, 61.8, 18.4. HRMS (ESI,  $m/z$ ) calcd for  $\text{C}_{10}\text{H}_9\text{N}_3\text{Na}$  [ $\text{M} + \text{Na}$ ] $^+$ : 194.0694, found: 194.0693.

## 2.2 Preparation of $\alpha$ -bromocinnamaldehyde<sup>3</sup>

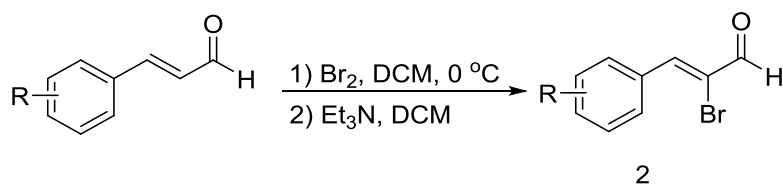

To a solution of cinnamaldehyde (10 mmol) in DCM (20 mL) was added Br<sub>2</sub> (12 mmol) at 0 °C. The reaction mixture was stirred for 15 min, followed by the addition of Et<sub>3</sub>N (17 mmol). After stirring for an additional 15 min, the reaction mixture was diluted with DCM and washed sequentially with a 10% NaHSO<sub>3</sub> solution, H<sub>2</sub>O, and brine. The organic layer was separated and dried over anhydrous Na<sub>2</sub>SO<sub>4</sub>, filtered, and concentrated to yield orange oil. Products were used for the next step without further purification.

## 3 General Procedure for Synthesis of Compounds 3

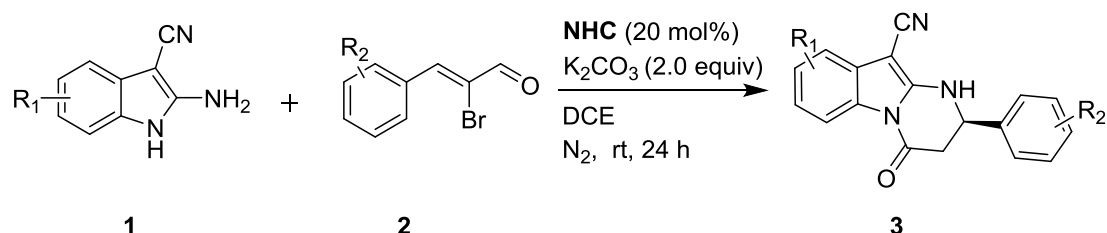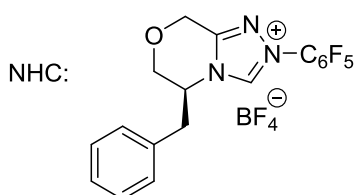

2-Amino-1H-indole-3-carbonitrile (1.0 equiv, 0.2 mmol),  $\alpha$ -bromocinnamaldehyde (2.0 equiv, 0.4 mmol), NHC (0.2 equiv, 0.04 mmol) and K<sub>2</sub>CO<sub>3</sub> (2.0 equiv, 0.4 mmol) were added to a reaction tube in DCE (2.0 mL) with N<sub>2</sub>. The tube was stirred for 24 h at rt. After completion, the crude reaction mixture was concentrated under reduced pressure and purified by flash chromatography on silica gel to give the product.

### 3.1 General Procedure for Synthesis of Compounds 3'

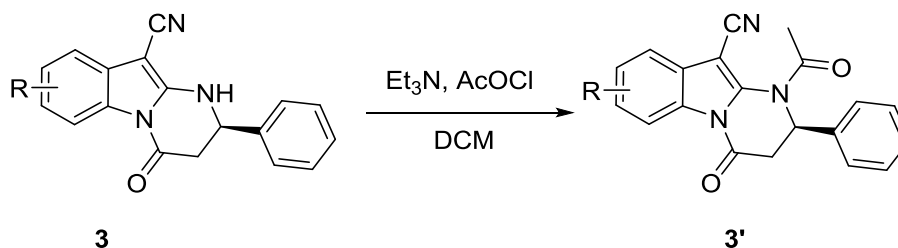

4-Oxo-2-phenyl-1,2,3,4-tetrahydropyrimido[1,2-a]indole-10-carbonitrile (1.0 equiv, 0.2 mmol), Et<sub>3</sub>N (1.2 equiv, 0.24 mmol) were added to a reaction tube in DCM (2.0 mL) at rt, then AcOCl (1.2 equiv, 0.24 mmol) were added after 30 minutes. The tube was stirred for 15-24 h at rt. After completion, the crude reaction mixture was quenched with water and extracted with ethyl acetate, then concentrated under reduced pressure and purified by flash chromatography on silica gel to give the product.

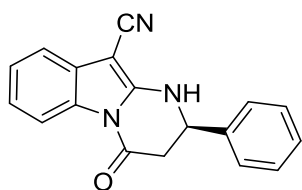

**(R)-4-Oxo-2-phenyl-1,2,3,4-tetrahydropyrimido[1,2-a]indole-10-carbonitrile (3a).** (yield: 72%). White solid, purified by flash column chromatography (eluent: Petroleum ether/EtOAc = 3/1). <sup>1</sup>H NMR (400 MHz, DMSO-*d*<sub>6</sub>) δ 9.20 (s, 1H), 8.05 (d, *J* = 8.0 Hz, 1H), 7.44 - 7.39 (m, 4H), 7.37 - 7.32 (m, 1H), 7.29 - 7.23 (m, 2H), 7.14 - 7.10 (m, 1H), 5.07 (t, *J* = 6.8 Hz, 1H), 3.20 - 3.18 (m, 2H). <sup>13</sup>C NMR (101 MHz, DMSO-*d*<sub>6</sub>) δ 166.0, 152.4, 140.6, 130.4, 129.2, 128.8, 128.6, 127.0, 125.6, 122.5, 116.4, 116.0, 115.2, 64.3, 53.8. HRMS (ESI, *m/z*) calcd for C<sub>18</sub>H<sub>13</sub>N<sub>3</sub>ONa [M + Na]<sup>+</sup>: 310.0956, found: 310.0956. Enantiomeric excess: 92%, determined by HPLC (Daicel Chiralpak AD-H, hexane/*i*-PrOH = 80:20 (v/v), λ = 254 nm, flow rate = 1.0 mL/min, rt): *t*<sub>minor</sub> = 8.24 min, *t*<sub>major</sub> = 9.08 min; [α]<sub>D</sub><sup>24</sup> = + 29.3 (c = 0.6, CHCl<sub>3</sub>).

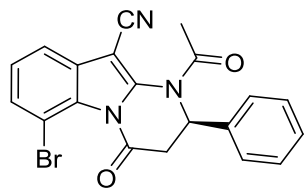

**(R)-1-Acetyl-6-bromo-4-oxo-2-phenyl-1,2,3,4-tetrahydropyrimido[1,2-a]indole-10-carbonitrile (3b')**. (yield: 81%). White solid, purified by flash column chromatography (eluent: Petroleum ether/EtOAc = 3/1).  $^1\text{H}$  NMR (400 MHz,  $\text{CDCl}_3$ )  $\delta$  7.62 (dd,  $J$  = 8.0, 1.2 Hz, 1H), 7.54 (dd,  $J$  = 7.6, 0.8 Hz, 1H), 7.36 - 7.32 (m, 2H), 7.29 - 7.23 (m, 4H), 6.38 (d,  $J$  = 5.6 Hz, 1H), 3.59 - 3.44 (m, 2H), 2.57 (s, 3H).  $^{13}\text{C}$  NMR (151 MHz,  $\text{CDCl}_3$ )  $\delta$  168.5, 162.8, 143.0, 135.7, 132.6, 131.1, 129.7, 129.4, 128.8, 127.1, 126.1, 118.3, 112.8, 109.2, 87.3, 54.7, 38.4, 22.4. HRMS (ESI,  $m/z$ ) calcd for  $\text{C}_{20}\text{H}_{14}\text{N}_3\text{O}_2\text{NaBr}$  [ $\text{M} + \text{Na}$ ] $^+$ : 430.0167, found: 430.0171. Enantiomeric excess: 80%, determined by HPLC (Daicel Chiralpak AD-H, hexane/*i*-PrOH = 80:20 (v/v),  $\lambda$  = 254 nm, flow rate = 1.0 mL/min, rt):  $t_{\text{major}}$  = 30.47 min,  $t_{\text{minor}}$  = 37.94 min;  $[\alpha]_{\text{D}}^{20}$  = + 73.7 ( $c$  = 0.3,  $\text{CHCl}_3$ ).

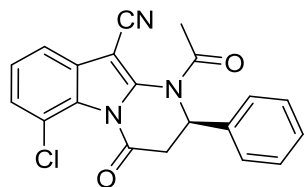

**(R)-1-Acetyl-6-chloro-4-oxo-2-phenyl-1,2,3,4-tetrahydropyrimido[1,2-a]indole-10-carbonitrile (3c')**. (yield: 60%). White solid, purified by flash column chromatography (eluent: Petroleum ether/EtOAc = 3/1).  $^1\text{H}$  NMR (400 MHz,  $\text{CDCl}_3$ )  $\delta$  7.42 (dd,  $J$  = 8.0, 1.2 Hz, 1H), 7.35 (dd,  $J$  = 8.0, 0.8 Hz, 1H), 7.28 - 7.19 (m, 6H), 6.31 (d,  $J$  = 6.0 Hz, 1H), 3.53 - 3.37 (m, 2H), 2.50 (s, 3H).  $^{13}\text{C}$  NMR (151 MHz,  $\text{CDCl}_3$ )  $\delta$  167.5, 161.8, 141.9, 134.6, 128.5, 128.4, 128.2, 128.1, 127.7, 125.8, 125.0, 121.1, 116.6, 111.8, 86.3, 53.5, 37.3, 21.4. HRMS (ESI,  $m/z$ ) calcd for  $\text{C}_{20}\text{H}_{14}\text{N}_3\text{O}_2\text{NaCl}$  [ $\text{M} + \text{Na}$ ] $^+$ : 386.0672, found: 386.0673. Enantiomeric excess: 92%, determined by HPLC (Daicel Chiralpak AD-H, hexane/*i*-PrOH = 80:20 (v/v),  $\lambda$  = 254 nm, flow rate = 1.0 mL/min, rt):  $t_{\text{major}}$  = 15.97 min,  $t_{\text{minor}}$  = 18.22 min;  $[\alpha]_{\text{D}}^{27}$  = + 55.7 ( $c$  = 0.9,  $\text{CHCl}_3$ ).

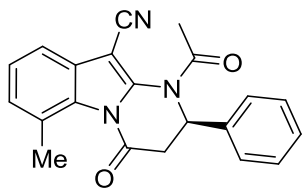

**(R)-1-Acetyl-6-methyl-4-oxo-2-phenyl-1,2,3,4-tetrahydropyrimido[1,2-a]indole-10-carbonitrile (3d')**. (yield: 67%). White solid, purified by flash column chromatography (eluent: Petroleum ether/EtOAc = 3/1).  $^1\text{H}$  NMR (600 MHz,  $\text{CDCl}_3$ )  $\delta$  7.40 (dd,  $J = 8.4, 1.2$  Hz, 1H), 7.33 - 7.24 (m, 6H), 7.20 (dt,  $J = 7.2, 1.2$  Hz, 1H), 6.40 (d,  $J = 5.4$  Hz, 1H), 3.53 - 3.41 (m, 2H), 2.60 (s, 3H), 2.56 (s, 3H).  $^{13}\text{C}$  NMR (151 MHz,  $\text{CDCl}_3$ )  $\delta$  168.8, 164.4, 141.9, 135.9, 131.4, 130.4, 129.3, 128.6, 127.2, 126.1, 126.0, 116.7, 113.3, 88.2, 54.0, 38.2, 23.0, 22.4. HRMS (ESI,  $m/z$ ) calcd for  $\text{C}_{21}\text{H}_{17}\text{N}_3\text{O}_2\text{Na}$   $[\text{M} + \text{Na}]^+$ : 366.1218, found: 366.1223. Enantiomeric excess: 82%, determined by HPLC (Daicel Chiralpak AD-H, hexane/*i*-PrOH = 95:5 (v/v),  $\lambda = 254$  nm, flow rate = 1.0 mL/min, rt):  $t_{\text{major}} = 30.18$  min,  $t_{\text{minor}} = 35.45$  min;  $[\alpha]_{\text{D}}^{20} = +29.8$  ( $c = 0.4$ ,  $\text{CHCl}_3$ ).

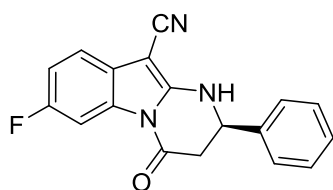

**(R)-7-Fluoro-4-oxo-2-phenyl-1,2,3,4-tetrahydropyrimido[1,2-a]indole-10-carbonitrile (3e)**. (yield: 60%). White solid, purified by flash column chromatography (eluent: Petroleum ether/EtOAc = 3/1).  $^1\text{H}$  NMR (600 MHz,  $\text{DMSO}-d_6$ )  $\delta$  9.25 (d,  $J = 2.4$  Hz, 1H), 7.83 (dd,  $J = 10.2, 3.0$  Hz, 1H), 7.43 - 7.40 (m, 4H), 7.38 - 7.34 (m, 1H), 7.26 (dd,  $J = 8.4, 4.8$  Hz, 1H), 7.13 (ddd,  $J = 9.6, 8.4, 2.4$  Hz, 1H), 5.09 - 5.06 (m, 1H), 3.19 (dd,  $J = 7.8, 6.0$  Hz, 2H).  $^{13}\text{C}$  NMR (151 MHz,  $\text{DMSO}-d_6$ )  $\delta$  166.2, 159.5, 158.0, 152.9, 140.4, 130.2 (d,  $J = 12.5$  Hz), 129.2, 128.6, 127.0, 125.1, 116.9 (d,  $J = 8.5$  Hz), 115.8, 112.6 (d,  $J = 23.4$  Hz), 103.1 (d,  $J = 29.1$  Hz), 63.8, 53.8.  $^{19}\text{F}$  NMR (565 MHz,  $\text{DMSO}-d_6$ )  $\delta$  -120.4 (d,  $J = 10.2$  Hz). HRMS (ESI,  $m/z$ ) calcd for  $\text{C}_{18}\text{H}_{12}\text{N}_3\text{ONaF}$   $[\text{M} + \text{Na}]^+$ : 328.0862, found: 328.0856. Enantiomeric excess: 90%, determined by HPLC (Daicel Chiralpak OD-H, hexane/*i*-PrOH = 80:20 (v/v),  $\lambda = 254$  nm, flow rate = 1.0 mL/min, rt):  $t_{\text{minor}} = 9.31$  min,  $t_{\text{major}} = 13.14$  min;  $[\alpha]_{\text{D}}^{25} = +25.5$  ( $c = 0.5$ ,  $\text{CHCl}_3$ ).

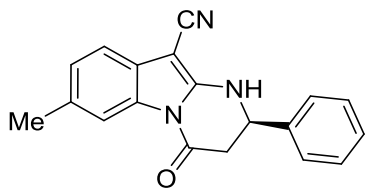

**(R)-7-Methyl-4-oxo-2-phenyl-1,2,3,4-tetrahydropyrimido[1,2-a]indole-10-carbonitrile (3f).** (yield: 55%). White solid, purified by flash column chromatography (eluent: Petroleum ether/EtOAc = 3/1).  $^1\text{H}$  NMR (400 MHz, DMSO- $d_6$ )  $\delta$  9.09 (d,  $J$  = 2.4 Hz, 1H), 7.91 (d,  $J$  = 1.2 Hz, 1H), 7.43 - 7.40 (m, 4H), 7.37 - 7.32 (m, 1H), 7.15 (d,  $J$  = 8.0 Hz, 1H), 7.08 (dd,  $J$  = 7.6, 1.2 Hz, 1H), 5.06 - 5.02 (m, 1H), 3.18 (dd,  $J$  = 5.6, 3.2 Hz, 2H), 2.35 (s, 3H).  $^{13}\text{C}$  NMR (151 MHz, DMSO- $d_6$ )  $\delta$  166.0, 152.2, 140.6, 131.8, 130.7, 129.2, 128.5, 126.9, 126.4, 126.2, 116.1, 116.1, 115.7, 64.1, 53.7, 21.7. HRMS (ESI,  $m/z$ ) calcd for  $\text{C}_{19}\text{H}_{15}\text{N}_3\text{ONa}$   $[\text{M} + \text{Na}]^+$  : 324.1113, found: 324.1108. Enantiomeric excess: 86%, determined by HPLC (Daicel Chiralpak AD-H, hexane/*i*-PrOH = 80:20 (v/v),  $\lambda$  = 254 nm, flow rate = 1.0 mL/min, rt):  $t_{\text{minor}}$  = 18.27 min,  $t_{\text{major}}$  = 21.87 min;  $[\alpha]_{\text{D}}^{26}$  = + 37.1 ( $c$  = 0.5,  $\text{CHCl}_3$ ).

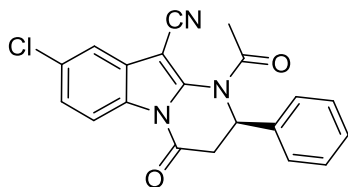

**(R)-1-Acetyl-8-chloro-4-oxo-2-phenyl-1,2,3,4-tetrahydropyrimido[1,2-a]indole-10-carbonitrile (3g').** (yield: 71%). White solid, purified by flash column chromatography (eluent: Petroleum ether/EtOAc = 3/1).  $^1\text{H}$  NMR (400 MHz,  $\text{CDCl}_3$ )  $\delta$  8.18 (d,  $J$  = 8.4 Hz, 1H), 7.48 (d,  $J$  = 2.0 Hz, 1H), 7.28 - 7.13 (m, 6H), 6.29 (d,  $J$  = 5.6 Hz, 1H), 3.48 - 3.31 (m, 2H), 2.53 (s, 3H).  $^{13}\text{C}$  NMR (151 MHz,  $\text{CDCl}_3$ )  $\delta$  167.5, 163.5, 140.4, 134.5, 130.8, 128.5, 128.2, 127.8, 126.1, 126.0, 124.7, 117.8, 116.3, 111.9, 84.4, 53.2, 36.6, 21.6. HRMS (ESI,  $m/z$ ) calcd for  $\text{C}_{20}\text{H}_{14}\text{N}_3\text{O}_2\text{NaCl}$   $[\text{M} + \text{Na}]^+$  : 386.0672, found: 386.0671. Enantiomeric excess: >99%, determined by HPLC (Daicel Chiralpak AD-H, hexane/*i*-PrOH = 80:20 (v/v),  $\lambda$  = 254 nm, flow rate = 1.0 mL/min, rt):  $t_{\text{major}}$  = 10.12 min,  $t_{\text{minor}}$  = 12.83 min;  $[\alpha]_{\text{D}}^{26}$  = + 100.4 ( $c$  = 0.5,  $\text{CHCl}_3$ ).



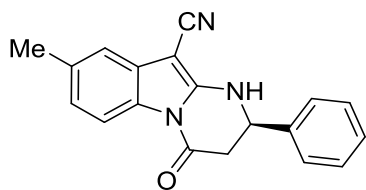

**(R)-8-Methyl-4-oxo-2-phenyl-1,2,3,4-tetrahydropyrimido[1,2-a]indole-10-carbonitrile (3h).** (yield: 53%). White solid, purified by flash column chromatography (eluent: Petroleum ether/EtOAc = 3/1).  $^1\text{H}$  NMR (400 MHz, DMSO- $d_6$ )  $\delta$  8.92 (d,  $J$  = 2.0 Hz, 1H), 7.67 (d,  $J$  = 8.0 Hz, 1H), 7.19 - 7.15 (m, 4H), 7.15 - 7.08 (m, 1H), 6.83 (t,  $J$  = 1.2 Hz, 1H), 6.68 (ddd,  $J$  = 8.4, 1.6, 0.4 Hz, 1H), 4.80 (td,  $J$  = 7.2, 2.0 Hz, 1H), 2.92 (d,  $J$  = 6.8 Hz, 2H), 2.11 (s, 3H).  $^{13}\text{C}$  NMR (151 MHz, DMSO- $d_6$ )  $\delta$  165.8, 152.5, 140.6, 134.8, 129.2, 128.9, 128.6, 128.4, 127.0, 123.3, 116.6, 116.0, 114.9, 64.1, 53.8, 21.5. HRMS (ESI,  $m/z$ ) calcd for  $\text{C}_{19}\text{H}_{15}\text{N}_3\text{ONa}$  [ $\text{M} + \text{Na}$ ] $^+$ : 324.1113, found: 324.1112. Enantiomeric excess: 80%, determined by HPLC (Daicel Chiralpak AD-H, hexane/*i*-PrOH = 80:20 (v/v),  $\lambda$  = 254 nm, flow rate = 1.0 mL/min, rt):  $t_{\text{major}}$  = 21.90 min,  $t_{\text{minor}}$  = 23.24 min;  $[\alpha]_{\text{D}}^{25}$  = + 109.8 (c = 0.5,  $\text{CHCl}_3$ ).

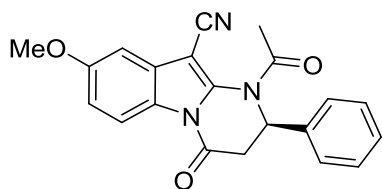

**(R)-1-Acetyl-8-methoxy-4-oxo-2-phenyl-1,2,3,4-tetrahydropyrimido[1,2-a]indole-10-carbonitrile (3i').** (yield: 55%). White solid, purified by flash column chromatography (eluent: Petroleum ether/EtOAc = 3/1).  $^1\text{H}$  NMR (400 MHz,  $\text{CDCl}_3$ )  $\delta$  8.20 (d,  $J$  = 8.8 Hz, 1H), 7.34 - 7.22 (m, 5H), 7.00 (d,  $J$  = 2.8 Hz, 1H), 6.96 (dd,  $J$  = 9.2, 2.8 Hz, 1H), 6.37 (d,  $J$  = 5.6 Hz, 1H), 3.84 (s, 3H), 3.52 - 3.36 (m, 2H), 2.60 (s, 3H).  $^{13}\text{C}$  NMR (151 MHz,  $\text{CDCl}_3$ )  $\delta$  168.7, 164.5, 158.1, 140.7, 135.8, 129.4, 128.7, 127.0, 125.9, 125.2, 117.2, 115.4, 113.6, 101.6, 86.2, 55.8, 54.2, 37.5, 22.5. HRMS (ESI,  $m/z$ ) calcd for  $\text{C}_{21}\text{H}_{17}\text{N}_3\text{O}_3\text{Na}$  [ $\text{M} + \text{Na}$ ] $^+$ : 382.1168, found: 382.1170. Enantiomeric excess: 93%, determined by HPLC (Daicel Chiralpak AD-H, hexane/*i*-PrOH = 80:20 (v/v),  $\lambda$  = 254 nm, flow rate = 1.0 mL/min, rt):  $t_{\text{major}}$  = 13.83 min,  $t_{\text{minor}}$  = 20.32 min;  $[\alpha]_{\text{D}}^{27}$  = + 32.3 (c = 0.6,  $\text{CHCl}_3$ ).

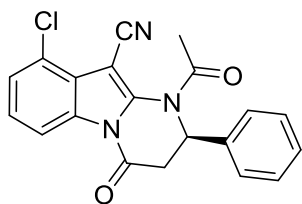

**(R)-1-Acetyl-9-chloro-4-oxo-2-phenyl-1,2,3,4-tetrahydropyrimido[1,2-a]indole-10-carbonitrile (3j)**. (yield: 61%). White solid, purified by flash column chromatography (eluent: Petroleum ether/EtOAc = 3/1).  $^1\text{H}$  NMR (400 MHz,  $\text{CDCl}_3$ )  $\delta$  8.27 (dd,  $J = 6.4, 3.2$  Hz, 1H), 7.36 - 7.24 (m, 7H), 6.44 (d,  $J = 6.0$  Hz, 1H), 3.58 - 3.38 (m, 2H), 2.63 (s, 3H).  $^{13}\text{C}$  NMR (151 MHz,  $\text{CDCl}_3$ )  $\delta$  168.7, 164.8, 142.8, 135.5, 132.0, 129.5, 128.8, 127.5, 126.5, 126.0, 125.9, 122.9, 114.7, 113.6, 85.6, 53.9, 37.6, 22.5. HRMS (ESI,  $m/z$ ) calcd for  $\text{C}_{20}\text{H}_{14}\text{N}_3\text{O}_2\text{NaCl}$  [ $\text{M} + \text{Na}$ ] $^+$  : 386.0672, found: 386.0671. Enantiomeric excess: 98%, determined by HPLC (Daicel Chiralpak AD-H, hexane/*i*-PrOH = 80:20 (v/v),  $\lambda = 254$  nm, flow rate = 1.0 mL/min, rt):  $t_{\text{major}} = 17.98$  min,  $t_{\text{minor}} = 24.20$  min;  $[\alpha]_{\text{D}}^{20} = +68.5$  ( $c = 0.6$ ,  $\text{CHCl}_3$ ).

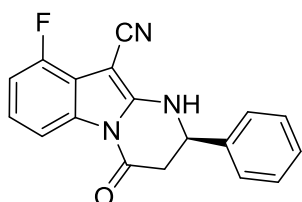

**(R)-9-Fluoro-4-oxo-2-phenyl-1,2,3,4-tetrahydropyrimido[1,2-a]indole-10-carbonitrile (3k)**. (yield: 65%). White solid, purified by flash column chromatography (eluent: Petroleum ether/EtOAc = 3/1).  $^1\text{H}$  NMR (400 MHz,  $\text{DMSO}-d_6$ )  $\delta$  9.34 (d,  $J = 2.4$  Hz, 1H), 7.91 - 7.89 (m, 1H), 7.44 - 7.41 (m, 4H), 7.40 - 7.32 (m, 1H), 7.13 - 7.07 (m, 2H), 5.09 (td,  $J = 7.2, 2.0$  Hz, 1H), 3.22 - 3.20 (m, 2H).  $^{13}\text{C}$  NMR (151 MHz,  $\text{DMSO}-d_6$ )  $\delta$  166.1, 154.3, 153.0, 152.7, 140.3, 132.4 (d,  $J = 8.5$  Hz), 128.6, 128.1 (d,  $J = 341.4$  Hz), 123.4 (d,  $J = 7.7$  Hz), 116.3, 116.2, 115.9, 111.7, 111.6, 60.8, 53.7.  $^{19}\text{F}$  NMR (565 MHz,  $\text{DMSO}-d_6$ )  $\delta$  -127.4 (dd,  $J = 9.6, 6.2$  Hz). HRMS (ESI,  $m/z$ ) calcd for  $\text{C}_{18}\text{H}_{12}\text{N}_3\text{OFNa}$  [ $\text{M} + \text{Na}$ ] $^+$  : 328.0862, found: 328.0858. Enantiomeric excess: 98%, determined by HPLC (Daicel Chiralpak AD-H, hexane/*i*-PrOH = 95:5 (v/v),  $\lambda = 254$  nm, flow rate = 1.0 mL/min, rt):  $t_{\text{minor}} = 24.91$  min,  $t_{\text{major}} = 30.94$  min;  $[\alpha]_{\text{D}}^{27} = +120.6$  ( $c = 0.3$ ,  $\text{CHCl}_3$ )

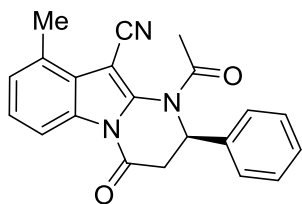

**(R)-1-Acetyl-9-methyl-4-oxo-2-phenyl-1,2,3,4-tetrahydropyrimido[1,2-a]indole-10-carbonitrile (3I')**. (yield: 71%). White solid, purified by flash column chromatography (eluent: Petroleum ether/EtOAc = 3/1).  $^1\text{H}$  NMR (400 MHz,  $\text{CDCl}_3$ )  $\delta$  8.19 (d,  $J = 8.4$  Hz, 1H), 7.34 - 7.23 (m, 6H), 7.10 (d,  $J = 7.6$  Hz, 1H), 6.42 (d,  $J = 5.2$  Hz, 1H), 3.55 - 3.26 (m, 2H), 2.67 (s, 3H), 2.61 (s, 3H).  $^{13}\text{C}$  NMR (151 MHz,  $\text{CDCl}_3$ )  $\delta$  168.9, 164.8, 141.6, 135.7, 131.2, 130.6, 129.4, 128.6, 127.2, 126.8, 125.9, 123.7, 115.1, 113.8, 86.0, 53.8, 37.5, 22.7, 18.3. HRMS (ESI,  $m/z$ ) calcd for  $\text{C}_{21}\text{H}_{17}\text{N}_3\text{O}_2\text{Na}$   $[\text{M} + \text{Na}]^+$ : 366.1218, found: 366.1220. Enantiomeric excess: 88%, determined by HPLC (Daicel Chiralpak AD-H, hexane/*i*-PrOH = 90:10 (v/v),  $\lambda = 254$  nm, flow rate = 1.0 mL/min, rt):  $t_{\text{major}} = 20.67$  min,  $t_{\text{minor}} = 24.54$  min;  $[\alpha]_{\text{D}}^{26} = +16.9$  ( $c = 0.7$ ,  $\text{CHCl}_3$ ).

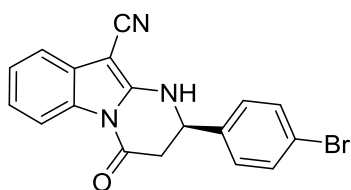

**(R)-2-(4-Bromophenyl)-4-oxo-1,2,3,4-tetrahydropyrimido[1,2-a]indole-10-carbonitrile (3m)**. (yield: 58%). White solid, purified by flash column chromatography (eluent: Petroleum ether/EtOAc = 3/1).  $^1\text{H}$  NMR (600 MHz,  $\text{DMSO}-d_6$ )  $\delta$  9.17 (d,  $J = 2.4$  Hz, 1H), 8.06 (d,  $J = 7.8$  Hz, 1H), 7.63 - 7.61 (m, 2H), 7.41 - 7.39 (m, 2H), 7.28 - 7.24 (m, 2H), 7.14 - 7.11 (m, 1H), 5.07 (td,  $J = 6.6, 1.8$  Hz, 1H), 3.18 (d,  $J = 6.6$  Hz, 2H).  $^{13}\text{C}$  NMR (151 MHz,  $\text{DMSO}-d_6$ )  $\delta$  164.7, 151.2, 138.8, 131.0, 129.3, 128.3, 127.6, 124.5, 121.5, 120.6, 115.3, 114.9, 114.2, 63.4, 52.2. HRMS (ESI,  $m/z$ ) calcd for  $\text{C}_{18}\text{H}_{12}\text{N}_3\text{ONaBr}$   $[\text{M} + \text{Na}]^+$ : 388.0061, found: 388.0059. Enantiomeric excess: 88%, determined by HPLC (Daicel Chiralpak OD-H, hexane/*i*-PrOH = 80:20 (v/v),  $\lambda = 254$  nm, flow rate = 1.0 mL/min, rt):  $t_{\text{minor}} = 9.50$  min,  $t_{\text{major}} = 11.71$  min;  $[\alpha]_{\text{D}}^{26} = +22.29$  ( $c = 0.6$ ,  $\text{CHCl}_3$ ).

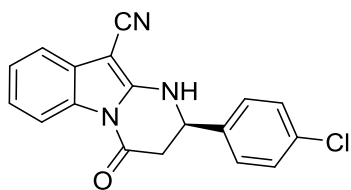

**(R)-2-(4-Chlorophenyl)-4-oxo-1,2,3,4-tetrahydropyrimido[1,2-a]indole-10-carbonitrile (3n).** (yield: 62%). White solid, purified by flash column chromatography (eluent: Petroleum ether/EtOAc = 3/1).  $^1\text{H}$  NMR (400 MHz,  $\text{DMSO-}d_6$ )  $\delta$  8.93 (d,  $J$  = 2.0 Hz, 1H), 7.81 (dt,  $J$  = 8.0, 0.8 Hz, 1H), 7.25 - 7.20 (m, 4H), 7.04 - 6.98 (m, 2H), 6.90 - 6.86 (m, 1H), 4.84 (td,  $J$  = 7.2, 2.0, 1H), 2.93 (d,  $J$  = 7.2 Hz, 2H).  $^{13}\text{C}$  NMR (151 MHz,  $\text{DMSO-}d_6$ )  $\delta$  165.8, 152.3, 139.5, 133.2, 130.4, 129.2, 129.0, 128.7, 125.6, 122.6, 116.4, 116.0, 115.2, 64.5, 53.3. HRMS (ESI,  $m/z$ ) calcd for  $\text{C}_{18}\text{H}_{12}\text{N}_3\text{ONaCl}$  [ $\text{M} + \text{Na}$ ] $^+$ : 344.0567, found: 344.0562. Enantiomeric excess: 80%, determined by HPLC (Daicel Chiralpak AD-H, hexane/*i*-PrOH = 95:5 (v/v),  $\lambda$  = 254 nm, flow rate = 0.8 mL/min, rt):  $t_{\text{minor}}$  = 35.52 min,  $t_{\text{major}}$  = 38.64 min;  $[\alpha]_{\text{D}}^{27}$  = + 55.7 ( $c$  = 0.3,  $\text{CHCl}_3$ ).

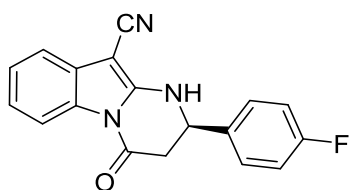

**(R)-2-(4-Fluorophenyl)-4-oxo-1,2,3,4-tetrahydropyrimido[1,2-a]indole-10-carbonitrile (3o).** (yield: 70%). White solid, purified by flash column chromatography (eluent: Petroleum ether/EtOAc = 3/1).  $^1\text{H}$  NMR (600 MHz,  $\text{DMSO-}d_6$ )  $\delta$  9.18 (d,  $J$  = 2.4 Hz, 1H), 8.06 (d,  $J$  = 7.8 Hz, 1H), 7.50 - 7.47 (m, 2H), 7.28 - 7.24 (m, 4H), 7.12 (td,  $J$  = 7.8, 1.8 Hz, 1H), 5.10 - 5.07 (m, 1H), 3.23 - 3.13 (m, 2H).  $^{13}\text{C}$  NMR (151 MHz,  $\text{DMSO-}d_6$ )  $\delta$  165.9, 163.1, 161.5, 152.3, 136.6, 130.3, 129.2 (d,  $J$  = 8.3 Hz), 128.7, 125.6, 122.6, 116.0, 115.9, 115.9, 115.8 (d,  $J$  = 176.4 Hz), 64.4, 53.2.  $^{19}\text{F}$  NMR (565 MHz,  $\text{DMSO-}d_6$ )  $\delta$  -114.2 (dt,  $J$  = 12.2, 6.4 Hz). HRMS (ESI,  $m/z$ ) calcd for  $\text{C}_{18}\text{H}_{12}\text{N}_3\text{ONaF}$  [ $\text{M} + \text{Na}$ ] $^+$ : 328.0862, found: 328.0862. Enantiomeric excess: 90%, determined by HPLC (Daicel Chiralpak AD-H, hexane/*i*-PrOH = 80:20 (v/v),  $\lambda$  = 254 nm, flow rate = 1.0 mL/min, rt):  $t_{\text{minor}}$  = 13.62 min,  $t_{\text{major}}$  = 15.20 min;  $[\alpha]_{\text{D}}^{26}$  = + 50.1 ( $c$  = 0.6,  $\text{CHCl}_3$ ).

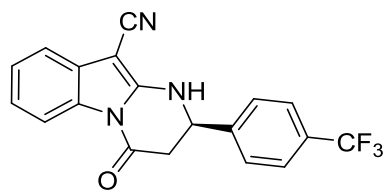

**(R)-4-Oxo-2-(4-(trifluoromethyl)phenyl)-1,2,3,4-tetrahydropyrimido [1,2-a]indole -10-carbonitrile (3p).** (yield: 68%). White solid, purified by flash column chromatography (eluent: Petroleum ether/EtOAc = 3/1).  $^1\text{H}$  NMR (400 MHz,  $\text{DMSO-}d_6$ )  $\delta$  9.29 (s, 1H), 8.12 (d,  $J = 8.0$  Hz, 1H), 7.79 (dd,  $J = 50.8, 8.0$  Hz, 4H), 7.32 (m, 2H), 7.21 -7.16 (m, 1H), 5.25 (t,  $J = 7.2$  Hz, 1H), 3.28 (d,  $J = 7.2$  Hz, 2H).  $^{13}\text{C}$  NMR (151 MHz,  $\text{DMSO-}d_6$ )  $\delta$  165.7, 152.3, 145.2, 130.4, 129.2 (dd,  $J = 62.8, 32.0$  Hz), 128.7, 128.1, 126.1 (d,  $J = 4.2$  Hz), 125.6, 125.5 (dd,  $J = 545.1, 272.1$  Hz), 122.7, 116.4, 115.9, 115.2, 64.6, 53.5.  $^{19}\text{F}$  NMR (565 MHz,  $\text{DMSO-}d_6$ )  $\delta$  -61.0. HRMS (ESI,  $m/z$ ) calcd for  $\text{C}_{19}\text{H}_{12}\text{N}_3\text{ONaF}_3$  [ $\text{M} + \text{Na}$ ] $^+$ : 378.0830, found: 378.0825. Enantiomeric excess: 90%, determined by HPLC (Daicel Chiralpak OD-H, hexane/*i*-PrOH = 90:10 (v/v),  $\lambda = 254$  nm, flow rate = 1.0 mL/min, rt):  $t_{\text{minor}} = 12.03$  min,  $t_{\text{major}} = 15.74$  min;  $[\alpha]_{\text{D}}^{26} = + 6.6$  (c = 0.6,  $\text{CHCl}_3$ ).

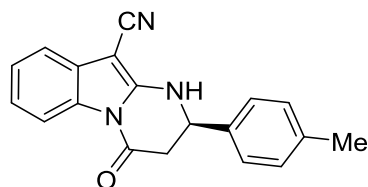

**(R)-4-Oxo-2-(p-tolyl)-1,2,3,4-tetrahydropyrimido[1,2-a]indole-10-carbonitrile (3q).** (yield: 52%). White solid, purified by flash column chromatography (eluent: Petroleum ether/EtOAc = 3/1).  $^1\text{H}$  NMR (400 MHz,  $\text{DMSO-}d_6$ )  $\delta$  9.19 (d,  $J = 2.0$  Hz, 1H), 8.05 (d,  $J = 8.0$  Hz, 1H), 7.25 (dd,  $J = 36.4, 8.0$ , 4H), 7.25 (dd,  $J = 6.8, 1.6$  Hz, 2H), 7.13 - 7.09 (m, 1H), 5.02 (td,  $J = 7.6, 2.0$  Hz, 1H), 3.15 - 3.15 (m, 2H), 2.29 (s, 3H).  $^{13}\text{C}$  NMR (151 MHz,  $\text{DMSO-}d_6$ )  $\delta$  166.1, 152.4, 137.8, 137.5, 130.4, 129.7, 128.8, 126.8, 125.5, 122.5, 116.3, 116.0, 115.2, 64.2, 53.4, 21.1. HRMS (ESI,  $m/z$ ) calcd for  $\text{C}_{19}\text{H}_{15}\text{N}_3\text{ONa}$  [ $\text{M} + \text{Na}$ ] $^+$ : 324.1113, found: 324.1107. Enantiomeric excess: 82%, determined by HPLC (Daicel Chiralpak AD-H, hexane/*i*-PrOH = 80:20 (v/v),  $\lambda = 254$

nm, flow rate = 1.0 mL/min, rt):  $t_{minor}$  = 11.12 min,  $t_{major}$  = 12.60 min;  $[\alpha]_D^{26}$  = + 53.1 (c = 0.6, CHCl<sub>3</sub>).

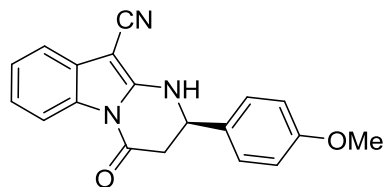

**(R)-2-(4-Methoxyphenyl)-4-oxo-1,2,3,4-tetrahydropyrimido[1,2-a]indole-10-carbonitrile (3r).** (yield: 47%). White solid, purified by flash column chromatography (eluent: Petroleum ether/EtOAc = 3/1). <sup>1</sup>H NMR (400 MHz, DMSO-*d*<sub>6</sub>) δ 9.14 (d, *J* = 2.0 Hz, 1H), 8.06 (dt, *J* = 8.0, 0.8 Hz, 1H), 7.36 - 7.32 (m, 2H), 7.28 - 7.22 (m, 2H), 7.14 - 7.10 (m, 1H), 6.99 - 6.95 (m, 2H), 5.03 - 4.99 (m, 1H), 3.75 (s, 3H), 3.18 - 3.15 (m, 2H). <sup>13</sup>C NMR (151 MHz, DMSO-*d*<sub>6</sub>) δ 166.2, 159.5, 152.4, 132.3, 130.3, 128.8, 128.2, 125.6, 122.5, 116.3, 116.0, 115.2, 114.5, 64.2, 55.6, 53.2. HRMS (ESI, *m/z*) calcd for C<sub>19</sub>H<sub>15</sub>N<sub>3</sub>O<sub>2</sub>Na [M + Na]<sup>+</sup>: 340.1062, found: 340.1064. Enantiomeric excess: 88%, determined by HPLC (Daicel Chiralpak AD-H, hexane/*i*-PrOH = 80:20 (v/v), λ = 254 nm, flow rate = 1.0 mL/min, rt):  $t_{minor}$  = 17.85 min,  $t_{major}$  = 19.65 min;  $[\alpha]_D^{27}$  = + 77.1 (c = 0.2, CHCl<sub>3</sub>).

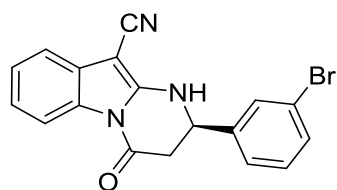

**(R)-2-(3-Bromophenyl)-4-oxo-1,2,3,4-tetrahydropyrimido[1,2-a]indole-10-carbonitrile (3s).** (yield: 65%). White solid, purified by flash column chromatography (eluent: Petroleum ether/EtOAc = 3/1). <sup>1</sup>H NMR (400 MHz, DMSO-*d*<sub>6</sub>) δ 9.17 (s, 1H), 8.07 (d, *J* = 8.4 Hz, 1H), 7.69 (t, *J* = 1.6 Hz, 1H), 7.57 (dt, *J* = 7.6, 1.6 Hz, 1H), 7.44 (dt, *J* = 8.0, 1.2 Hz, 1H), 7.38 (t, *J* = 7.6 Hz, 1H), 7.30 - 7.24 (m, 2H), 7.15 - 7.11 (m, 1H), 5.09 (dd, *J* = 10.0, 5.2 Hz, 1H), 3.25 (dd, *J* = 16.8, 9.2 Hz, 1H), 3.15 (dd, *J* = 16.8, 5.2 Hz, 1H). <sup>13</sup>C NMR (151 MHz, DMSO-*d*<sub>6</sub>) δ 165.8, 152.3, 143.1, 131.5, 131.4, 130.3, 130.2, 128.7, 126.2, 125.6, 122.6, 122.3, 116.4, 115.9, 115.2, 64.6, 53.4. HRMS (ESI,

m/z) calcd for C<sub>18</sub>H<sub>12</sub>N<sub>3</sub>ONaBr [M + Na]<sup>+</sup> : 388.0061, found: 388.0057. Enantiomeric excess: 80%, determined by HPLC (Daicel Chiralpak OD-H, hexane/*i*-PrOH = 80:20 (v/v), λ = 254 nm, flow rate = 1.0 mL/min, rt): *t*<sub>minor</sub> = 10.44 min, *t*<sub>major</sub> = 15.31 min; [α]<sub>D</sub><sup>26</sup> = + 9.0 (c = 0.9, CHCl<sub>3</sub>).

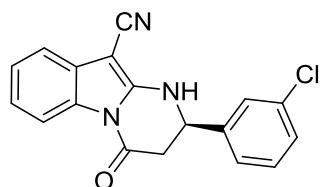

**(R)-2-(3-Chlorophenyl)-4-oxo-1,2,3,4-tetrahydropyrimido[1,2-a]indole-10-carbonitrile (3t).** (yield: 75%). White solid, purified by flash column chromatography (eluent: Petroleum ether/EtOAc = 3/1). <sup>1</sup>H NMR (400 MHz, DMSO-*d*<sub>6</sub>) δ 9.18 (s, 1H), 8.07 (d, *J* = 8.0 Hz, 1H), 7.55 (d, *J* = 2.4 Hz, 1H), 7.48 - 7.38 (m, 3H), 7.30 - 7.24 (m, 2H), 7.15 - 7.11 (m, 1H), 5.12 - 5.08 (m, 1H), 3.25 (dd, *J* = 16.4, 8.8 Hz, 1H), 3.16 (dd, *J* = 16.6, 5.2 Hz, 1H). <sup>13</sup>C NMR (151 MHz, DMSO-*d*<sub>6</sub>) δ 165.8, 152.3, 142.9, 133.7, 131.1, 130.3, 128.7, 128.6, 127.3, 125.8, 125.6, 122.6, 116.4, 115.9, 115.2, 64.6, 53.4. HRMS (ESI, m/z) calcd for C<sub>18</sub>H<sub>12</sub>N<sub>3</sub>ONaCl [M + Na]<sup>+</sup> : 344.0567, found: 344.0566. Enantiomeric excess: 84%, determined by HPLC (Daicel Chiralpak IB-3, hexane/*i*-PrOH = 80:20 (v/v), λ = 254 nm, flow rate = 1.0 mL/min, rt): *t*<sub>minor</sub> = 10.73 min, *t*<sub>major</sub> = 14.52 min; [α]<sub>D</sub><sup>26</sup> = + 96.6 (c = 0.5, CHCl<sub>3</sub>).

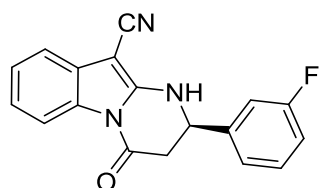

**(R)-2-(3-Fluorophenyl)-4-oxo-1,2,3,4-tetrahydropyrimido[1,2-a]indole-10-carbonitrile (3u).** (yield: 58%). White solid, purified by flash column chromatography (eluent: Petroleum ether/EtOAc = 3/1). <sup>1</sup>H NMR (400 MHz, DMSO-*d*<sub>6</sub>) δ 9.14 (d, *J* = 2.0 Hz, 1H), 7.99 (dd, *J* = 8.0, 0.8 Hz, 1H), 7.39 (td, *J* = 8.0, 6.4 Hz, 1H), 7.26 - 7.22 (m, 1H), 7.21 - 7.18 (m, 3H), 7.13 (td, *J* = 8.4, 2.8 Hz, 1H), 7.08 - 7.04 (m, 1H), 5.05 - 5.01 (m, 1H), 3.20 - 3.08 (m, 2H). <sup>13</sup>C NMR (151 MHz, ) δ 165.8, 163.5, 161.9, 152.3,

143.3 (d,  $J = 7.1$  Hz), 131.3 (d,  $J = 8.3$  Hz), 130.3, 128.7, 125.6, 123.1 (d,  $J = 2.1$  Hz), 122.6, 116.4, 115.9, 115.2, 114.8 (dd,  $J = 198.4, 20.8$  Hz), 64.5, 53.4.  $^{19}\text{F}$  NMR (565 MHz, DMSO- $d_6$ )  $\delta$  -112.5 (q,  $J = 8.0$  Hz). HRMS (ESI,  $m/z$ ) calcd for  $\text{C}_{18}\text{H}_{13}\text{N}_3\text{OF}[\text{M} + \text{Na}]^+$ : 306.1043, found: 306.1046. Enantiomeric excess: 84%, determined by HPLC (Daicel Chiralpak AD-H, hexane/*i*-PrOH = 95:5 (v/v),  $\lambda = 254$  nm, flow rate = 1.0 mL/min, rt):  $t_{\text{minor}} = 23.01$  min,  $t_{\text{major}} = 26.16$  min;  $[\alpha]_{\text{D}}^{26} = +23.5$  ( $c = 0.3$ ,  $\text{CHCl}_3$ ).

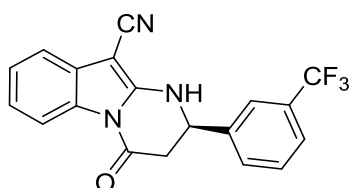

**(R)-4-Oxo-2-(3-(trifluoromethyl)phenyl)-1,2,3,4-tetrahydropyrimido[1,2-a]indole-10-carbonitrile (3v).** (yield: 65%). White solid, purified by flash column chromatography (eluent: Petroleum ether/EtOAc = 3/1).  $^1\text{H}$  NMR (400 MHz, DMSO- $d_6$ )  $\delta$  9.19 (s, 1H), 8.09 (d,  $J = 7.6$  Hz, 1H), 7.87 (s, 1H), 7.78 - 7.74 (m, 2H), 7.67 (t,  $J = 7.6$  Hz, 1H), 7.31 - 7.24 (m, 2H), 7.16 - 7.12 (m, 1H), 5.21 (ddd,  $J = 10.0, 5.2, 1.6$  Hz, 1H), 3.32 (dd,  $J = 16.4, 10.0$  Hz, 1H), 3.16 (dd,  $J = 16.4, 4.8$  Hz, 1H).  $^{13}\text{C}$  NMR (151 MHz, DMSO- $d_6$ )  $\delta$  165.8, 152.4, 141.7, 131.4, 130.6, 130.3, 129.8 (dd,  $J = 64.0, 32.0$  Hz), 128.7, 125.6, 125.5 (dd,  $J = 545.0, 273.2$  Hz), 124.3 (dt,  $J = 187.4, 5.4$  Hz), 122.7, 116.4, 115.9, 115.3, 64.7, 53.7.  $^{19}\text{F}$  NMR (565 MHz, DMSO- $d_6$ )  $\delta$  -61.0. HRMS (ESI,  $m/z$ ) calcd for  $\text{C}_{19}\text{H}_{12}\text{N}_3\text{ONaF}_3$   $[\text{M} + \text{Na}]^+$ : 378.0830, found: 378.0823. Enantiomeric excess: 86%, determined by HPLC (Daicel Chiralpak OD-3, hexane/*i*-PrOH = 90:10 (v/v),  $\lambda = 254$  nm, flow rate = 1.0 mL/min, rt):  $t_{\text{minor}} = 17.09$  min,  $t_{\text{major}} = 19.00$  min;  $[\alpha]_{\text{D}}^{26} = +67.8$  ( $c = 0.4$ ,  $\text{CHCl}_3$ ).

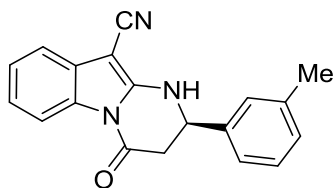

**(R)-4-Oxo-2-(m-tolyl)-1,2,3,4-tetrahydropyrimido[1,2-a]indole-10-carbonitrile (3w).** (yield: 75%). White solid, purified by flash column chromatography (eluent:



Petroleum ether/EtOAc = 3/1).  $^1\text{H}$  NMR (400 MHz, DMSO- $d_6$ )  $\delta$  9.18 (s, 1H), 8.06 (d,  $J$  = 8.4 Hz, 1H), 7.31 - 7.25 (m, 4H), 7.23 - 7.10 (m, 3H), 5.02 (t,  $J$  = 6.8 Hz, 1H), 3.17 (d,  $J$  = 6.8 Hz, 2H), 2.32 (s, 3H).  $^{13}\text{C}$  NMR (151 MHz, DMSO- $d_6$ )  $\delta$  166.1, 152.4, 140.4, 138.4, 130.3, 129.2, 129.1, 128.8, 127.6, 125.6, 123.9, 122.5, 116.3, 116.0, 115.2, 64.2, 53.7, 21.5. HRMS (ESI,  $m/z$ ) calcd for  $\text{C}_{19}\text{H}_{15}\text{N}_3\text{ONa}$  [ $\text{M} + \text{Na}$ ] $^+$ : 324.1113, found: 324.1113. Enantiomeric excess: 82%, determined by HPLC (Daicel Chiralpak OD-H, hexane/*i*-PrOH = 90:10 (v/v),  $\lambda$  = 254 nm, flow rate = 1.0 mL/min, rt):  $t_{\text{minor}}$  = 14.78 min,  $t_{\text{major}}$  = 19.33 min;  $[\alpha]_{\text{D}}^{25}$  = + 16.1 ( $c$  = 0.6,  $\text{CHCl}_3$ ).

### 3.2 The transformation of Compounds 3a to 4a

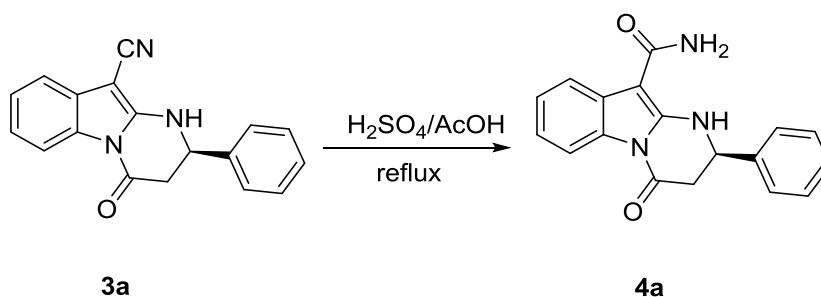

To a stirred solution of **3a** (0.2 mmol) in AcOH (2.0 mL), cooled in an ice bath, was added 50%  $\text{H}_2\text{SO}_4$  (1.0 mL), the reaction was allowed to warm up to 120 °C. After 1 h, distilled aq.  $\text{Na}_2\text{CO}_3$  (10 mL) was added, cooling applied and the product was collected by chromatography on silica gel.

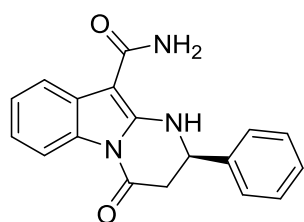

#### **(R)-4-Oxo-2-phenyl-1,2,3,4-tetrahydropyrimido[1,2-a]indole-10-carboxamide**

**(4a)**. (yield: 51%). White solid, purified by flash column chromatography (eluent: Petroleum DCM/MeOH = 20/1).  $^1\text{H}$  NMR (400 MHz, DMSO- $d_6$ )  $\delta$  8.48 (s, 1H), 8.11 (d,  $J$  = 8.0 Hz, 1H), 7.73 (d,  $J$  = 7.6 Hz, 1H), 7.44 - 7.32 (m, 5H), 7.21 (td,  $J$  = 7.6, 1.2 Hz, 1H), 7.07 (t,  $J$  = 8.0 Hz, 1H), 6.99 (s, 2H), 5.12 (t,  $J$  = 6.8 Hz, 1H), 3.28 - 3.16 (m,

2H).  $^{13}\text{C}$  NMR (151 MHz,  $\text{DMSO-}d_6$ )  $\delta$  168.0, 166.2, 151.2, 141.2, 131.0, 129.3, 128.6, 127.4, 126.7, 125.0, 121.5, 117.8, 114.8, 88.4, 53.4. HRMS (ESI,  $m/z$ ) calcd for  $\text{C}_{18}\text{H}_{16}\text{N}_3\text{O}_2$   $[\text{M} + \text{H}]^+$  : 306.1206, found: 306.1208. Enantiomeric excess: 84%, determined by HPLC (Daicel Chiralpak IC-3, hexane/*i*-PrOH = 50:50 (v/v),  $\lambda$  = 254 nm, flow rate = 1.0 mL/min, rt):  $t_{\text{minor}}$  = 20.23 min,  $t_{\text{major}}$  = 14.65 min;  $[\alpha]_{\text{D}}^{26} = +76.6$  ( $c = 0.4$ ,  $\text{CHCl}_3$ ).

#### 4. X-ray crystal structure of (-)-3a

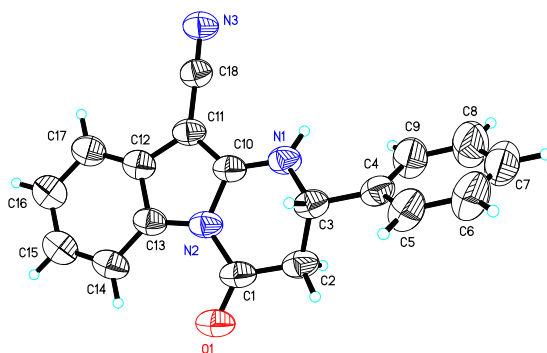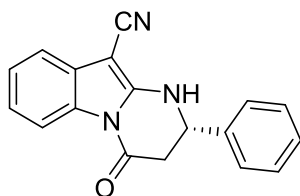

**(-)-3a**

Table 1. Crystal data and structure refinement for d8v23073.

|                                   |                                                  |                 |
|-----------------------------------|--------------------------------------------------|-----------------|
| Identification code               | d8v23073                                         |                 |
| Empirical formula                 | C <sub>18</sub> H <sub>13</sub> N <sub>3</sub> O |                 |
| Formula weight                    | 287.31                                           |                 |
| Temperature                       | 293(2) K                                         |                 |
| Wavelength                        | 1.54178 Å                                        |                 |
| Crystal system                    | Monoclinic                                       |                 |
| Space group                       | P 21                                             |                 |
| Unit cell dimensions              | a = 5.4603(2) Å                                  | α = 90°.        |
|                                   | b = 20.5881(9) Å                                 | β = 93.864(2)°. |
|                                   | c = 12.9406(6) Å                                 | γ = 90°.        |
| Volume                            | 1451.44(11) Å <sup>3</sup>                       |                 |
| Z                                 | 4                                                |                 |
| Density (calculated)              | 1.315 Mg/m <sup>3</sup>                          |                 |
| Absorption coefficient            | 0.675 mm <sup>-1</sup>                           |                 |
| F(000)                            | 600                                              |                 |
| Crystal size                      | 0.140 x 0.120 x 0.060 mm <sup>3</sup>            |                 |
| Theta range for data collection   | 4.041 to 67.985°.                                |                 |
| Index ranges                      | -6 ≤ h ≤ 6, -24 ≤ k ≤ 24, -15 ≤ l ≤ 15           |                 |
| Reflections collected             | 19539                                            |                 |
| Independent reflections           | 5271 [R(int) = 0.0789]                           |                 |
| Completeness to theta = 67.679°   | 99.6 %                                           |                 |
| Absorption correction             | Semi-empirical from equivalents                  |                 |
| Max. and min. transmission        | 0.7533 and 0.5264                                |                 |
| Refinement method                 | Full-matrix least-squares on F <sup>2</sup>      |                 |
| Data / restraints / parameters    | 5271 / 25 / 386                                  |                 |
| Goodness-of-fit on F <sup>2</sup> | 1.053                                            |                 |
| Final R indices [I > 2σ(I)]       | R1 = 0.0644, wR2 = 0.1718                        |                 |
| R indices (all data)              | R1 = 0.0812, wR2 = 0.1932                        |                 |
| Absolute structure parameter      | 0.0(3)                                           |                 |
| Extinction coefficient            | 0.037(6)                                         |                 |
| Largest diff. peak and hole       | 0.234 and -0.206 e.Å <sup>-3</sup>               |                 |

Table 2. Atomic coordinates ( $\times 10^4$ ) and equivalent isotropic displacement parameters ( $\text{\AA}^2 \times 10^3$ )

for d8v23073.  $U(\text{eq})$  is defined as one third of the trace of the orthogonalized  $U^{ij}$  tensor.

|       | x         | y       | z       | $U(\text{eq})$ |
|-------|-----------|---------|---------|----------------|
| O(1)  | 2818(7)   | 2922(2) | 4510(4) | 92(1)          |
| N(1)  | 8661(9)   | 4093(2) | 4194(4) | 73(1)          |
| N(2)  | 5974(7)   | 3527(2) | 5233(4) | 71(1)          |
| N(3)  | 12314(10) | 4939(3) | 6561(5) | 90(2)          |
| C(1)  | 4572(9)   | 3275(2) | 4383(5) | 75(2)          |
| C(2)  | 5352(10)  | 3486(3) | 3354(5) | 82(2)          |
| C(3)  | 8079(10)  | 3626(2) | 3366(4) | 72(1)          |
| C(4)  | 8905(11)  | 3851(3) | 2343(5) | 78(2)          |
| C(5)  | 9498(16)  | 3407(4) | 1625(6) | 107(2)         |
| C(6)  | 10380(20) | 3588(6) | 686(6)  | 133(3)         |
| C(7)  | 10670(20) | 4214(6) | 448(7)  | 141(4)         |
| C(8)  | 10120(30) | 4666(5) | 1188(8) | 159(5)         |
| C(9)  | 9212(19)  | 4487(3) | 2113(6) | 117(3)         |
| C(10) | 7926(8)   | 3956(2) | 5136(5) | 67(1)          |
| C(11) | 8764(9)   | 4157(2) | 6113(4) | 70(1)          |
| C(12) | 7281(9)   | 3841(3) | 6854(5) | 73(1)          |
| C(13) | 5541(9)   | 3460(2) | 6290(5) | 74(1)          |
| C(14) | 3809(11)  | 3094(3) | 6767(7) | 88(2)          |
| C(15) | 3855(13)  | 3121(4) | 7845(7) | 98(2)          |
| C(16) | 5595(13)  | 3492(4) | 8408(6) | 97(2)          |
| C(17) | 7323(12)  | 3855(3) | 7908(6) | 86(2)          |
| C(18) | 10732(10) | 4582(3) | 6345(5) | 72(1)          |
| O(2)  | 12357(8)  | 7077(2) | 5991(4) | 96(1)          |
| N(4)  | 6585(8)   | 5903(2) | 6393(4) | 71(1)          |
| N(5)  | 9317(7)   | 6430(2) | 5318(4) | 70(1)          |
| N(6)  | 2913(10)  | 4998(3) | 4108(5) | 92(2)          |
| C(19) | 10548(10) | 6761(3) | 6117(5) | 77(2)          |
| C(20) | 9330(12)  | 6725(3) | 7101(5) | 89(2)          |
| C(21) | 8095(11)  | 6087(3) | 7313(5) | 77(1)          |
| C(22) | 6597(9)   | 6117(2) | 8260(3) | 80(1)          |
| C(23) | 5542(13)  | 6690(2) | 8585(5) | 144(3)         |
| C(24) | 4196(14)  | 6691(3) | 9459(5) | 151(3)         |

|       |           |         |          |        |
|-------|-----------|---------|----------|--------|
| C(25) | 3905(14)  | 6119(4) | 10008(5) | 151(3) |
| C(26) | 4961(17)  | 5546(3) | 9684(6)  | 167(3) |
| C(27) | 6307(14)  | 5545(2) | 8809(5)  | 160(3) |
| C(28) | 7299(9)   | 6023(2) | 5450(4)  | 67(1)  |
| C(29) | 6346(9)   | 5827(2) | 4485(4)  | 66(1)  |
| C(30) | 7758(10)  | 6137(2) | 3706(5)  | 70(1)  |
| C(31) | 9616(10)  | 6498(2) | 4239(5)  | 71(1)  |
| C(32) | 11329(11) | 6852(3) | 3724(6)  | 85(2)  |
| C(33) | 11081(13) | 6843(3) | 2662(6)  | 95(2)  |
| C(34) | 9219(13)  | 6498(3) | 2119(6)  | 96(2)  |
| C(35) | 7553(12)  | 6140(3) | 2633(5)  | 85(2)  |
| C(36) | 4426(10)  | 5383(3) | 4279(5)  | 72(1)  |

---

Table 3. Bond lengths [ $\text{\AA}$ ] and angles [ $^\circ$ ] for d8v23073.

---

|             |           |
|-------------|-----------|
| O(1)-C(1)   | 1.222(7)  |
| N(1)-C(10)  | 1.339(8)  |
| N(1)-C(3)   | 1.458(7)  |
| N(1)-H(1)   | 0.8600    |
| N(2)-C(1)   | 1.397(7)  |
| N(2)-C(10)  | 1.396(6)  |
| N(2)-C(13)  | 1.410(8)  |
| N(3)-C(18)  | 1.154(7)  |
| C(1)-C(2)   | 1.490(9)  |
| C(2)-C(3)   | 1.516(8)  |
| C(2)-H(2A)  | 0.9700    |
| C(2)-H(2B)  | 0.9700    |
| C(3)-C(4)   | 1.501(9)  |
| C(3)-H(3)   | 0.9800    |
| C(4)-C(9)   | 1.356(9)  |
| C(4)-C(5)   | 1.358(9)  |
| C(5)-C(6)   | 1.388(13) |
| C(5)-H(5)   | 0.9300    |
| C(6)-C(7)   | 1.336(14) |
| C(6)-H(6)   | 0.9300    |
| C(7)-C(8)   | 1.383(15) |
| C(7)-H(7)   | 0.9300    |
| C(8)-C(9)   | 1.376(13) |
| C(8)-H(8)   | 0.9300    |
| C(9)-H(9)   | 0.9300    |
| C(10)-C(11) | 1.379(8)  |
| C(11)-C(18) | 1.401(8)  |
| C(11)-C(12) | 1.450(8)  |
| C(12)-C(17) | 1.363(9)  |
| C(12)-C(13) | 1.399(8)  |
| C(13)-C(14) | 1.386(8)  |
| C(14)-C(15) | 1.395(11) |
| C(14)-H(14) | 0.9300    |
| C(15)-C(16) | 1.387(11) |
| C(15)-H(15) | 0.9300    |
| C(16)-C(17) | 1.397(10) |

|              |           |
|--------------|-----------|
| C(16)-H(16)  | 0.9300    |
| C(17)-H(17)  | 0.9300    |
| O(2)-C(19)   | 1.203(7)  |
| N(4)-C(28)   | 1.329(7)  |
| N(4)-C(21)   | 1.452(7)  |
| N(4)-H(4)    | 0.8600    |
| N(5)-C(19)   | 1.375(7)  |
| N(5)-C(28)   | 1.405(6)  |
| N(5)-C(31)   | 1.424(7)  |
| N(6)-C(36)   | 1.155(7)  |
| C(19)-C(20)  | 1.478(9)  |
| C(20)-C(21)  | 1.511(8)  |
| C(20)-H(20A) | 0.9700    |
| C(20)-H(20B) | 0.9700    |
| C(21)-C(22)  | 1.520(7)  |
| C(21)-H(21)  | 0.9800    |
| C(22)-C(23)  | 1.3900    |
| C(22)-C(27)  | 1.3900    |
| C(23)-C(24)  | 1.3900    |
| C(23)-H(23)  | 0.9300    |
| C(24)-C(25)  | 1.3900    |
| C(24)-H(24)  | 0.9300    |
| C(25)-C(26)  | 1.3900    |
| C(25)-H(25)  | 0.9300    |
| C(26)-C(27)  | 1.3900    |
| C(26)-H(26)  | 0.9300    |
| C(27)-H(27)  | 0.9300    |
| C(28)-C(29)  | 1.381(8)  |
| C(29)-C(36)  | 1.403(7)  |
| C(29)-C(30)  | 1.457(8)  |
| C(30)-C(35)  | 1.385(9)  |
| C(30)-C(31)  | 1.401(8)  |
| C(31)-C(32)  | 1.390(8)  |
| C(32)-C(33)  | 1.372(10) |
| C(32)-H(32)  | 0.9300    |
| C(33)-C(34)  | 1.392(10) |
| C(33)-H(33)  | 0.9300    |
| C(34)-C(35)  | 1.376(9)  |

|                  |          |
|------------------|----------|
| C(34)-H(34)      | 0.9300   |
| C(35)-H(35)      | 0.9300   |
| C(10)-N(1)-C(3)  | 117.8(4) |
| C(10)-N(1)-H(1)  | 121.1    |
| C(3)-N(1)-H(1)   | 121.1    |
| C(1)-N(2)-C(10)  | 123.0(5) |
| C(1)-N(2)-C(13)  | 127.5(5) |
| C(10)-N(2)-C(13) | 109.1(4) |
| O(1)-C(1)-N(2)   | 120.5(6) |
| O(1)-C(1)-C(2)   | 124.5(5) |
| N(2)-C(1)-C(2)   | 115.0(5) |
| C(1)-C(2)-C(3)   | 112.7(5) |
| C(1)-C(2)-H(2A)  | 109.1    |
| C(3)-C(2)-H(2A)  | 109.1    |
| C(1)-C(2)-H(2B)  | 109.1    |
| C(3)-C(2)-H(2B)  | 109.1    |
| H(2A)-C(2)-H(2B) | 107.8    |
| N(1)-C(3)-C(4)   | 112.4(4) |
| N(1)-C(3)-C(2)   | 107.4(5) |
| C(4)-C(3)-C(2)   | 113.7(5) |
| N(1)-C(3)-H(3)   | 107.7    |
| C(4)-C(3)-H(3)   | 107.7    |
| C(2)-C(3)-H(3)   | 107.7    |
| C(9)-C(4)-C(5)   | 117.5(7) |
| C(9)-C(4)-C(3)   | 122.7(6) |
| C(5)-C(4)-C(3)   | 119.7(6) |
| C(4)-C(5)-C(6)   | 122.0(8) |
| C(4)-C(5)-H(5)   | 119.0    |
| C(6)-C(5)-H(5)   | 119.0    |
| C(7)-C(6)-C(5)   | 121.0(9) |
| C(7)-C(6)-H(6)   | 119.5    |
| C(5)-C(6)-H(6)   | 119.5    |
| C(6)-C(7)-C(8)   | 117.0(9) |
| C(6)-C(7)-H(7)   | 121.5    |
| C(8)-C(7)-H(7)   | 121.5    |
| C(9)-C(8)-C(7)   | 122.0(9) |
| C(9)-C(8)-H(8)   | 119.0    |



|                   |          |
|-------------------|----------|
| C(7)-C(8)-H(8)    | 119.0    |
| C(4)-C(9)-C(8)    | 120.4(8) |
| C(4)-C(9)-H(9)    | 119.8    |
| C(8)-C(9)-H(9)    | 119.8    |
| N(1)-C(10)-C(11)  | 132.1(5) |
| N(1)-C(10)-N(2)   | 119.5(5) |
| C(11)-C(10)-N(2)  | 108.5(5) |
| C(10)-C(11)-C(18) | 125.9(5) |
| C(10)-C(11)-C(12) | 107.8(5) |
| C(18)-C(11)-C(12) | 126.3(5) |
| C(17)-C(12)-C(13) | 119.9(5) |
| C(17)-C(12)-C(11) | 132.8(5) |
| C(13)-C(12)-C(11) | 107.3(5) |
| C(14)-C(13)-C(12) | 122.2(6) |
| C(14)-C(13)-N(2)  | 130.4(6) |
| C(12)-C(13)-N(2)  | 107.4(5) |
| C(13)-C(14)-C(15) | 117.2(6) |
| C(13)-C(14)-H(14) | 121.4    |
| C(15)-C(14)-H(14) | 121.4    |
| C(16)-C(15)-C(14) | 120.9(7) |
| C(16)-C(15)-H(15) | 119.6    |
| C(14)-C(15)-H(15) | 119.6    |
| C(15)-C(16)-C(17) | 120.7(7) |
| C(15)-C(16)-H(16) | 119.6    |
| C(17)-C(16)-H(16) | 119.6    |
| C(12)-C(17)-C(16) | 119.1(6) |
| C(12)-C(17)-H(17) | 120.5    |
| C(16)-C(17)-H(17) | 120.5    |
| N(3)-C(18)-C(11)  | 177.9(7) |
| C(28)-N(4)-C(21)  | 121.3(5) |
| C(28)-N(4)-H(4)   | 119.4    |
| C(21)-N(4)-H(4)   | 119.4    |
| C(19)-N(5)-C(28)  | 123.5(5) |
| C(19)-N(5)-C(31)  | 127.3(5) |
| C(28)-N(5)-C(31)  | 108.7(4) |
| O(2)-C(19)-N(5)   | 122.0(6) |
| O(2)-C(19)-C(20)  | 124.4(6) |
| N(5)-C(19)-C(20)  | 113.5(5) |

|                     |          |
|---------------------|----------|
| C(19)-C(20)-C(21)   | 115.5(5) |
| C(19)-C(20)-H(20A)  | 108.4    |
| C(21)-C(20)-H(20A)  | 108.4    |
| C(19)-C(20)-H(20B)  | 108.4    |
| C(21)-C(20)-H(20B)  | 108.4    |
| H(20A)-C(20)-H(20B) | 107.5    |
| N(4)-C(21)-C(20)    | 108.3(5) |
| N(4)-C(21)-C(22)    | 111.4(5) |
| C(20)-C(21)-C(22)   | 112.4(5) |
| N(4)-C(21)-H(21)    | 108.2    |
| C(20)-C(21)-H(21)   | 108.2    |
| C(22)-C(21)-H(21)   | 108.2    |
| C(23)-C(22)-C(27)   | 120.0    |
| C(23)-C(22)-C(21)   | 122.4(4) |
| C(27)-C(22)-C(21)   | 117.6(4) |
| C(24)-C(23)-C(22)   | 120.0    |
| C(24)-C(23)-H(23)   | 120.0    |
| C(22)-C(23)-H(23)   | 120.0    |
| C(23)-C(24)-C(25)   | 120.0    |
| C(23)-C(24)-H(24)   | 120.0    |
| C(25)-C(24)-H(24)   | 120.0    |
| C(26)-C(25)-C(24)   | 120.0    |
| C(26)-C(25)-H(25)   | 120.0    |
| C(24)-C(25)-H(25)   | 120.0    |
| C(25)-C(26)-C(27)   | 120.0    |
| C(25)-C(26)-H(26)   | 120.0    |
| C(27)-C(26)-H(26)   | 120.0    |
| C(26)-C(27)-C(22)   | 120.0    |
| C(26)-C(27)-H(27)   | 120.0    |
| C(22)-C(27)-H(27)   | 120.0    |
| N(4)-C(28)-C(29)    | 131.4(5) |
| N(4)-C(28)-N(5)     | 120.2(5) |
| C(29)-C(28)-N(5)    | 108.4(5) |
| C(28)-C(29)-C(36)   | 126.4(5) |
| C(28)-C(29)-C(30)   | 108.3(5) |
| C(36)-C(29)-C(30)   | 125.3(5) |
| C(35)-C(30)-C(31)   | 119.9(5) |
| C(35)-C(30)-C(29)   | 133.2(5) |

|                   |          |
|-------------------|----------|
| C(31)-C(30)-C(29) | 106.9(5) |
| C(32)-C(31)-C(30) | 122.0(6) |
| C(32)-C(31)-N(5)  | 130.3(5) |
| C(30)-C(31)-N(5)  | 107.7(4) |
| C(33)-C(32)-C(31) | 116.7(6) |
| C(33)-C(32)-H(32) | 121.7    |
| C(31)-C(32)-H(32) | 121.7    |
| C(32)-C(33)-C(34) | 122.2(6) |
| C(32)-C(33)-H(33) | 118.9    |
| C(34)-C(33)-H(33) | 118.9    |
| C(35)-C(34)-C(33) | 120.9(7) |
| C(35)-C(34)-H(34) | 119.6    |
| C(33)-C(34)-H(34) | 119.6    |
| C(34)-C(35)-C(30) | 118.4(7) |
| C(34)-C(35)-H(35) | 120.8    |
| C(30)-C(35)-H(35) | 120.8    |
| N(6)-C(36)-C(29)  | 177.3(6) |

---

Symmetry transformations used to generate equivalent atoms:

Table 4. Anisotropic displacement parameters ( $\text{\AA}^2 \times 10^3$ ) for d8v23073. The anisotropic displacement factor exponent takes the form:  $-2\pi^2 [ h^2 a^{*2} U^{11} + \dots + 2 h k a^* b^* U^{12} ]$

|       | U <sup>11</sup> | U <sup>22</sup> | U <sup>33</sup> | U <sup>23</sup> | U <sup>13</sup> | U <sup>12</sup> |
|-------|-----------------|-----------------|-----------------|-----------------|-----------------|-----------------|
| O(1)  | 61(2)           | 82(3)           | 129(4)          | -12(2)          | -12(2)          | -11(2)          |
| N(1)  | 76(3)           | 57(2)           | 84(3)           | -6(2)           | -8(2)           | -8(2)           |
| N(2)  | 58(2)           | 59(2)           | 95(3)           | -8(2)           | -7(2)           | -5(2)           |
| N(3)  | 82(3)           | 78(3)           | 109(4)          | -18(3)          | -1(3)           | -17(3)          |
| C(1)  | 53(2)           | 56(3)           | 114(5)          | -13(3)          | -12(3)          | 2(2)            |
| C(2)  | 74(3)           | 67(3)           | 100(4)          | -9(3)           | -26(3)          | -2(3)           |
| C(3)  | 69(3)           | 53(2)           | 91(4)           | -8(2)           | -13(2)          | 2(2)            |
| C(4)  | 82(3)           | 66(3)           | 84(4)           | -5(3)           | -14(3)          | -5(3)           |
| C(5)  | 141(6)          | 89(4)           | 89(5)           | -10(4)          | -15(4)          | 21(4)           |
| C(6)  | 186(9)          | 133(7)          | 78(5)           | -13(5)          | -5(5)           | 28(7)           |
| C(7)  | 193(10)         | 144(8)          | 84(5)           | -5(5)           | -2(6)           | -30(7)          |
| C(8)  | 268(14)         | 107(6)          | 100(6)          | 12(5)           | 1(7)            | -41(8)          |
| C(9)  | 187(9)          | 64(4)           | 96(5)           | 1(3)            | -8(5)           | -10(4)          |
| C(10) | 55(2)           | 48(2)           | 96(4)           | -7(2)           | -7(2)           | 3(2)            |
| C(11) | 61(3)           | 58(3)           | 91(4)           | -12(2)          | -4(2)           | -2(2)           |
| C(12) | 64(3)           | 57(3)           | 99(4)           | -10(3)          | 3(3)            | 4(2)            |
| C(13) | 62(3)           | 57(3)           | 104(4)          | -7(3)           | 5(3)            | 1(2)            |
| C(14) | 64(3)           | 63(3)           | 139(6)          | -4(3)           | 13(3)           | -3(3)           |
| C(15) | 89(4)           | 90(4)           | 118(6)          | 2(4)            | 21(4)           | 0(3)            |
| C(16) | 95(4)           | 92(4)           | 106(5)          | -11(4)          | 18(4)           | -3(4)           |
| C(17) | 88(4)           | 74(3)           | 96(5)           | -13(3)          | 7(3)            | -2(3)           |
| C(18) | 70(3)           | 61(3)           | 86(4)           | -11(2)          | -3(2)           | -1(2)           |
| O(2)  | 78(2)           | 74(2)           | 135(4)          | -14(2)          | 3(2)            | -19(2)          |
| N(4)  | 73(3)           | 61(2)           | 79(3)           | -6(2)           | 0(2)            | -15(2)          |
| N(5)  | 67(2)           | 47(2)           | 96(3)           | -4(2)           | 4(2)            | -7(2)           |
| N(6)  | 88(3)           | 85(3)           | 103(4)          | -10(3)          | -1(3)           | -20(3)          |
| C(19) | 71(3)           | 51(3)           | 108(4)          | -11(3)          | -2(3)           | -5(2)           |
| C(20) | 95(4)           | 75(4)           | 96(4)           | -19(3)          | 3(3)            | -16(3)          |
| C(21) | 76(3)           | 64(3)           | 89(4)           | -10(3)          | -5(3)           | -1(2)           |
| C(22) | 83(3)           | 80(3)           | 75(3)           | -8(3)           | -3(3)           | -3(3)           |
| C(23) | 187(7)          | 125(6)          | 124(6)          | 13(5)           | 46(5)           | 55(5)           |
| C(24) | 187(6)          | 142(5)          | 130(5)          | 2(4)            | 47(5)           | 44(5)           |
| C(25) | 184(6)          | 145(5)          | 130(5)          | 8(5)            | 55(5)           | 20(5)           |

|       |        |        |        |       |       |       |
|-------|--------|--------|--------|-------|-------|-------|
| C(26) | 213(7) | 133(5) | 163(6) | 28(5) | 76(5) | 10(5) |
| C(27) | 216(8) | 102(5) | 171(7) | 26(5) | 92(6) | 6(6)  |
| C(28) | 68(3)  | 43(2)  | 88(4)  | -5(2) | 5(2)  | -6(2) |
| C(29) | 62(3)  | 52(2)  | 86(4)  | -4(2) | 4(2)  | -8(2) |
| C(30) | 68(3)  | 54(2)  | 88(4)  | -2(3) | 11(2) | 2(2)  |
| C(31) | 71(3)  | 46(2)  | 96(4)  | -4(2) | 11(3) | 3(2)  |
| C(32) | 77(3)  | 61(3)  | 119(5) | 0(3)  | 20(3) | -5(3) |
| C(33) | 100(5) | 80(4)  | 108(5) | 0(4)  | 33(4) | -5(4) |
| C(34) | 104(5) | 84(4)  | 103(5) | 5(4)  | 30(4) | 7(4)  |
| C(35) | 87(4)  | 72(3)  | 97(4)  | -3(3) | 12(3) | 2(3)  |
| C(36) | 69(3)  | 61(3)  | 88(4)  | -7(2) | 3(3)  | -6(2) |

---

Table 5. Hydrogen coordinates ( $\times 10^4$ ) and isotropic displacement parameters ( $\text{\AA}^2 \times 10^{-3}$ ) for d8v23073.

|        | x     | y    | z     | U(eq) |
|--------|-------|------|-------|-------|
| H(1)   | 9451  | 4444 | 4081  | 88    |
| H(2A)  | 4448  | 3874 | 3138  | 98    |
| H(2B)  | 4940  | 3148 | 2849  | 98    |
| H(3)   | 8954  | 3222 | 3549  | 86    |
| H(5)   | 9310  | 2968 | 1768  | 129   |
| H(6)   | 10764 | 3270 | 215   | 160   |
| H(7)   | 11223 | 4339 | -186  | 169   |
| H(8)   | 10372 | 5104 | 1056  | 191   |
| H(9)   | 8806  | 4805 | 2583  | 140   |
| H(14)  | 2666  | 2841 | 6384  | 106   |
| H(15)  | 2702  | 2888 | 8191  | 118   |
| H(16)  | 5611  | 3499 | 9127  | 116   |
| H(17)  | 8487  | 4103 | 8289  | 103   |
| H(4)   | 5201  | 5713 | 6459  | 85    |
| H(20A) | 8108  | 7067 | 7102  | 107   |
| H(20B) | 10545 | 6813 | 7666  | 107   |
| H(21)  | 9373  | 5756 | 7437  | 92    |
| H(23)  | 5736  | 7073 | 8217  | 172   |
| H(24)  | 3489  | 7074 | 9677  | 181   |
| H(25)  | 3005  | 6119 | 10593 | 181   |
| H(26)  | 4767  | 5163 | 10051 | 200   |
| H(27)  | 7013  | 5162 | 8592  | 191   |
| H(32)  | 12582 | 7082 | 4081  | 102   |
| H(33)  | 12193 | 7075 | 2293  | 114   |
| H(34)  | 9099  | 6509 | 1399  | 115   |
| H(35)  | 6320  | 5906 | 2269  | 102   |

Table 6. Torsion angles [°] for d8v23073.

---

|                         |           |
|-------------------------|-----------|
| C(10)-N(2)-C(1)-O(1)    | -177.0(5) |
| C(13)-N(2)-C(1)-O(1)    | -4.5(8)   |
| C(10)-N(2)-C(1)-C(2)    | 1.5(7)    |
| C(13)-N(2)-C(1)-C(2)    | 173.9(5)  |
| O(1)-C(1)-C(2)-C(3)     | -152.0(5) |
| N(2)-C(1)-C(2)-C(3)     | 29.6(6)   |
| C(10)-N(1)-C(3)-C(4)    | 177.4(5)  |
| C(10)-N(1)-C(3)-C(2)    | 51.6(6)   |
| C(1)-C(2)-C(3)-N(1)     | -53.9(6)  |
| C(1)-C(2)-C(3)-C(4)     | -178.9(5) |
| N(1)-C(3)-C(4)-C(9)     | -24.9(9)  |
| C(2)-C(3)-C(4)-C(9)     | 97.4(8)   |
| N(1)-C(3)-C(4)-C(5)     | 151.7(6)  |
| C(2)-C(3)-C(4)-C(5)     | -86.0(7)  |
| C(9)-C(4)-C(5)-C(6)     | -0.3(11)  |
| C(3)-C(4)-C(5)-C(6)     | -177.1(7) |
| C(4)-C(5)-C(6)-C(7)     | -0.1(15)  |
| C(5)-C(6)-C(7)-C(8)     | 1.5(18)   |
| C(6)-C(7)-C(8)-C(9)     | -2.6(19)  |
| C(5)-C(4)-C(9)-C(8)     | -0.8(13)  |
| C(3)-C(4)-C(9)-C(8)     | 175.9(9)  |
| C(7)-C(8)-C(9)-C(4)     | 2.3(18)   |
| C(3)-N(1)-C(10)-C(11)   | 156.4(5)  |
| C(3)-N(1)-C(10)-N(2)    | -22.7(7)  |
| C(1)-N(2)-C(10)-N(1)    | -6.3(7)   |
| C(13)-N(2)-C(10)-N(1)   | 180.0(4)  |
| C(1)-N(2)-C(10)-C(11)   | 174.4(4)  |
| C(13)-N(2)-C(10)-C(11)  | 0.7(5)    |
| N(1)-C(10)-C(11)-C(18)  | -0.2(9)   |
| N(2)-C(10)-C(11)-C(18)  | 178.9(5)  |
| N(1)-C(10)-C(11)-C(12)  | -179.1(5) |
| N(2)-C(10)-C(11)-C(12)  | 0.1(6)    |
| C(10)-C(11)-C(12)-C(17) | 178.9(6)  |
| C(18)-C(11)-C(12)-C(17) | 0.0(10)   |
| C(10)-C(11)-C(12)-C(13) | -0.9(6)   |
| C(18)-C(11)-C(12)-C(13) | -179.7(5) |

|                         |           |
|-------------------------|-----------|
| C(17)-C(12)-C(13)-C(14) | 0.7(8)    |
| C(11)-C(12)-C(13)-C(14) | -179.5(5) |
| C(17)-C(12)-C(13)-N(2)  | -178.5(5) |
| C(11)-C(12)-C(13)-N(2)  | 1.3(5)    |
| C(1)-N(2)-C(13)-C(14)   | 6.3(9)    |
| C(10)-N(2)-C(13)-C(14)  | 179.7(5)  |
| C(1)-N(2)-C(13)-C(12)   | -174.6(5) |
| C(10)-N(2)-C(13)-C(12)  | -1.3(5)   |
| C(12)-C(13)-C(14)-C(15) | 0.3(8)    |
| N(2)-C(13)-C(14)-C(15)  | 179.2(5)  |
| C(13)-C(14)-C(15)-C(16) | -1.1(9)   |
| C(14)-C(15)-C(16)-C(17) | 1.0(11)   |
| C(13)-C(12)-C(17)-C(16) | -0.8(8)   |
| C(11)-C(12)-C(17)-C(16) | 179.5(6)  |
| C(15)-C(16)-C(17)-C(12) | 0.0(10)   |
| C(28)-N(5)-C(19)-O(2)   | 175.6(5)  |
| C(31)-N(5)-C(19)-O(2)   | -13.0(9)  |
| C(28)-N(5)-C(19)-C(20)  | -8.6(7)   |
| C(31)-N(5)-C(19)-C(20)  | 162.8(5)  |
| O(2)-C(19)-C(20)-C(21)  | -148.1(6) |
| N(5)-C(19)-C(20)-C(21)  | 36.2(8)   |
| C(28)-N(4)-C(21)-C(20)  | 36.5(7)   |
| C(28)-N(4)-C(21)-C(22)  | 160.6(5)  |
| C(19)-C(20)-C(21)-N(4)  | -48.7(7)  |
| C(19)-C(20)-C(21)-C(22) | -172.2(5) |
| N(4)-C(21)-C(22)-C(23)  | -93.6(6)  |
| C(20)-C(21)-C(22)-C(23) | 28.2(7)   |
| N(4)-C(21)-C(22)-C(27)  | 86.6(6)   |
| C(20)-C(21)-C(22)-C(27) | -151.6(5) |
| C(27)-C(22)-C(23)-C(24) | 0.0       |
| C(21)-C(22)-C(23)-C(24) | -179.8(5) |
| C(22)-C(23)-C(24)-C(25) | 0.0       |
| C(23)-C(24)-C(25)-C(26) | 0.0       |
| C(24)-C(25)-C(26)-C(27) | 0.0       |
| C(25)-C(26)-C(27)-C(22) | 0.0       |
| C(23)-C(22)-C(27)-C(26) | 0.0       |
| C(21)-C(22)-C(27)-C(26) | 179.8(5)  |
| C(21)-N(4)-C(28)-C(29)  | 170.9(5)  |



|                         |           |
|-------------------------|-----------|
| C(21)-N(4)-C(28)-N(5)   | -11.3(7)  |
| C(19)-N(5)-C(28)-N(4)   | -4.7(7)   |
| C(31)-N(5)-C(28)-N(4)   | -177.4(4) |
| C(19)-N(5)-C(28)-C(29)  | 173.5(5)  |
| C(31)-N(5)-C(28)-C(29)  | 0.8(5)    |
| N(4)-C(28)-C(29)-C(36)  | -6.6(9)   |
| N(5)-C(28)-C(29)-C(36)  | 175.4(5)  |
| N(4)-C(28)-C(29)-C(30)  | 176.1(5)  |
| N(5)-C(28)-C(29)-C(30)  | -1.8(6)   |
| C(28)-C(29)-C(30)-C(35) | -176.7(6) |
| C(36)-C(29)-C(30)-C(35) | 6.0(9)    |
| C(28)-C(29)-C(30)-C(31) | 2.2(6)    |
| C(36)-C(29)-C(30)-C(31) | -175.1(5) |
| C(35)-C(30)-C(31)-C(32) | -1.8(8)   |
| C(29)-C(30)-C(31)-C(32) | 179.2(5)  |
| C(35)-C(30)-C(31)-N(5)  | 177.3(5)  |
| C(29)-C(30)-C(31)-N(5)  | -1.7(5)   |
| C(19)-N(5)-C(31)-C(32)  | 7.2(9)    |
| C(28)-N(5)-C(31)-C(32)  | 179.6(5)  |
| C(19)-N(5)-C(31)-C(30)  | -171.8(5) |
| C(28)-N(5)-C(31)-C(30)  | 0.7(5)    |
| C(30)-C(31)-C(32)-C(33) | 1.5(8)    |
| N(5)-C(31)-C(32)-C(33)  | -177.3(6) |
| C(31)-C(32)-C(33)-C(34) | -0.2(10)  |
| C(32)-C(33)-C(34)-C(35) | -0.9(11)  |
| C(33)-C(34)-C(35)-C(30) | 0.7(10)   |
| C(31)-C(30)-C(35)-C(34) | 0.6(8)    |
| C(29)-C(30)-C(35)-C(34) | 179.4(6)  |

---

Symmetry transformations used to generate equivalent atoms:

Table 7. Hydrogen bonds for d8v23073 [Å and °].

| D-H...A            | d(D-H) | d(H...A) | d(D...A)  | <(DHA) |
|--------------------|--------|----------|-----------|--------|
| C(32)-H(32)...O(2) | 0.93   | 2.48     | 2.986(9)  | 114.1  |
| C(21)-H(21)...N(3) | 0.98   | 2.63     | 3.484(8)  | 145.2  |
| N(4)-H(4)...N(3)#1 | 0.86   | 2.25     | 3.081(7)  | 161.9  |
| C(14)-H(14)...O(1) | 0.93   | 2.44     | 2.956(10) | 115.1  |
| C(3)-H(3)...O(2)#2 | 0.98   | 2.55     | 3.309(7)  | 134.6  |
| C(3)-H(3)...O(1)#3 | 0.98   | 2.45     | 3.236(7)  | 136.4  |
| N(1)-H(1)...N(6)#3 | 0.86   | 2.21     | 2.986(7)  | 150.6  |
| N(1)-H(1)...N(6)#3 | 0.86   | 2.21     | 2.986(7)  | 150.6  |
| C(3)-H(3)...O(1)#3 | 0.98   | 2.45     | 3.236(7)  | 136.4  |
| C(3)-H(3)...O(2)#2 | 0.98   | 2.55     | 3.309(7)  | 134.6  |
| C(14)-H(14)...O(1) | 0.93   | 2.44     | 2.956(10) | 115.1  |
| N(4)-H(4)...N(3)#1 | 0.86   | 2.25     | 3.081(7)  | 161.9  |
| C(21)-H(21)...N(3) | 0.98   | 2.63     | 3.484(8)  | 145.2  |
| C(32)-H(32)...O(2) | 0.93   | 2.48     | 2.986(9)  | 114.1  |

Symmetry transformations used to generate equivalent atoms:

#1 x-1,y,z #2 -x+2,y-1/2,-z+1 #3 x+1,y,z

## 5. References

- O. Benek., O. Soukup., M. Pasdiorova., L. Hroch., V. Sepsova., P. Jost., M. Hrabinoval., D. Jun., K. Kuca., D. Zala., R. R. Ramsay., J. Marco-Contelles, and K. Musilek., *Chem. Med. Chem.*, **2016**, *11(12)*, 1264 -1269.
- a). X.-B. Yang, H. Fu, R.-Z. Qiao, Y.-Y. Jiang, Y.-F. Zhao, *Adv. Syn & Cat.*, 2010, **352**, 1033 - 1038. b). C. Willemann, R. Grünert, P. J. Bednarski, R. Troschütz. *Bioorg. Med. Chem.*, 2009, **17**, 4406 - 4419.
- Y. Liu, J. Chen, Z. Zhang, J. Qin, M. Zhao and W. Zhang. *Org. Biomol. Chem.*, **2016**, *14(29)*, 7099 - 7102.

## 6. $^1\text{H}$ , $^{13}\text{C}$ and $^{19}\text{F}$ NMR spectra and HPLC Spectra

### 2-Amino-1H-indole-3-carbonitrile (1a). [ $^1\text{H}$ \_NMR\_400 MHz\_(DMSO- $d_6$ : 3.45, 2.50 ppm)]

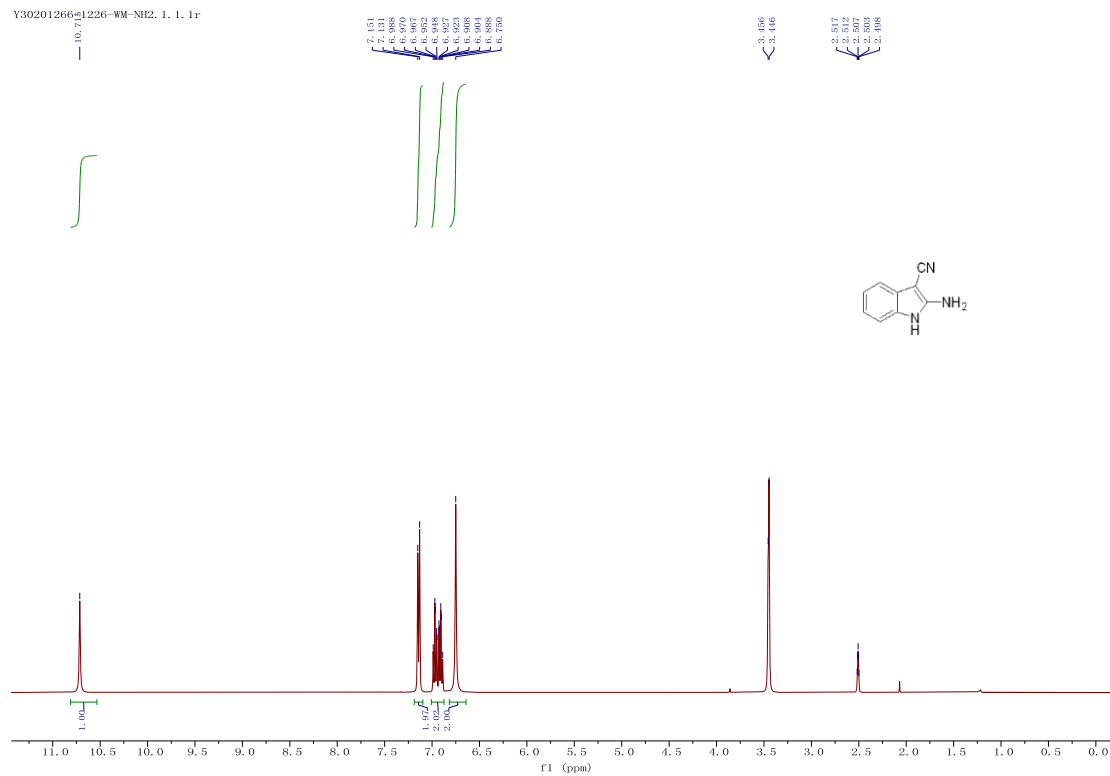

### [ $^{13}\text{C}$ \_NMR\_151 MHz\_(DMSO- $d_6$ : 39.5 ppm)]

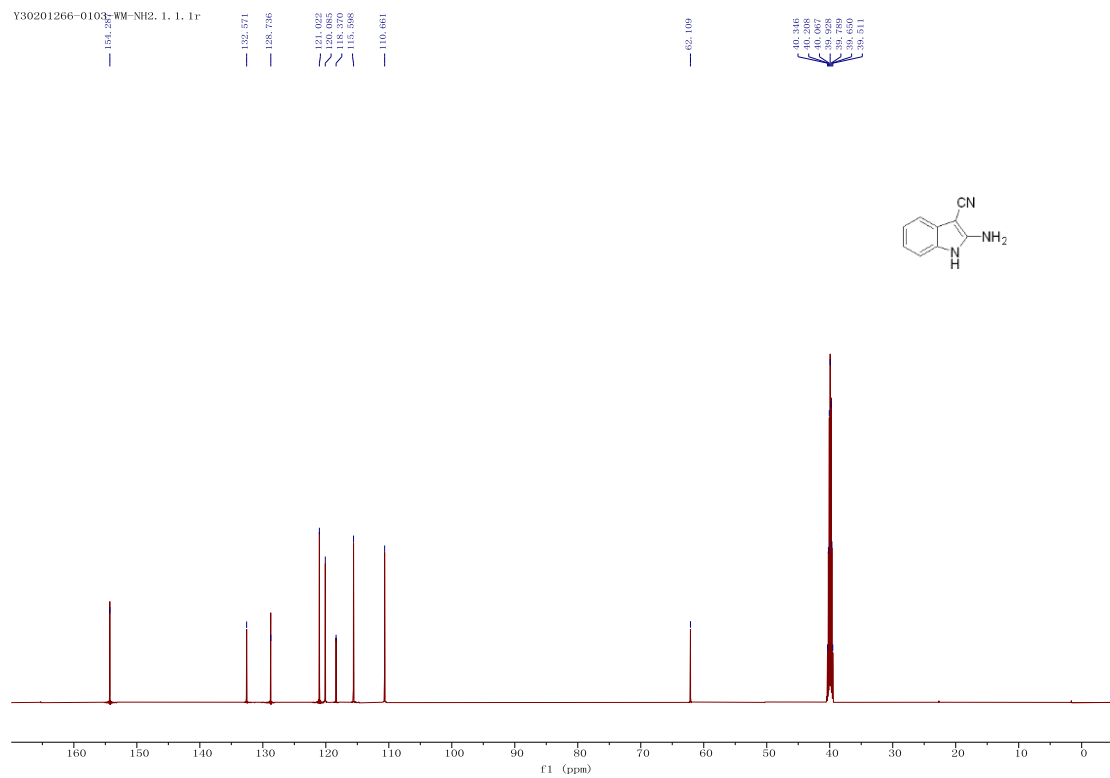

**2-Amino-7-bromo-1H-indole-3-carbonitrile (1b).** [ $^1\text{H-NMR}$ \_400 MHz\_(DMSO- $d_6$ : 3.5, 2.50 ppm)]

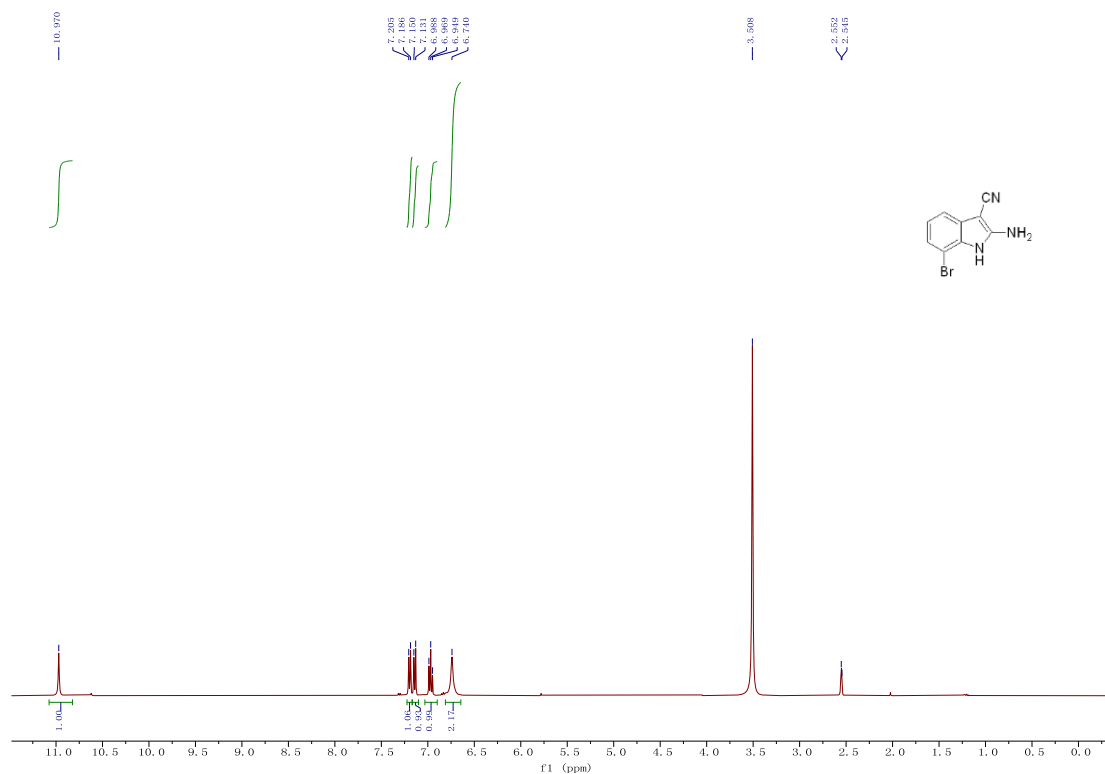

**[ $^{13}\text{C-NMR}$ \_151 MHz\_(DMSO- $d_6$ : 39.5 ppm)]**

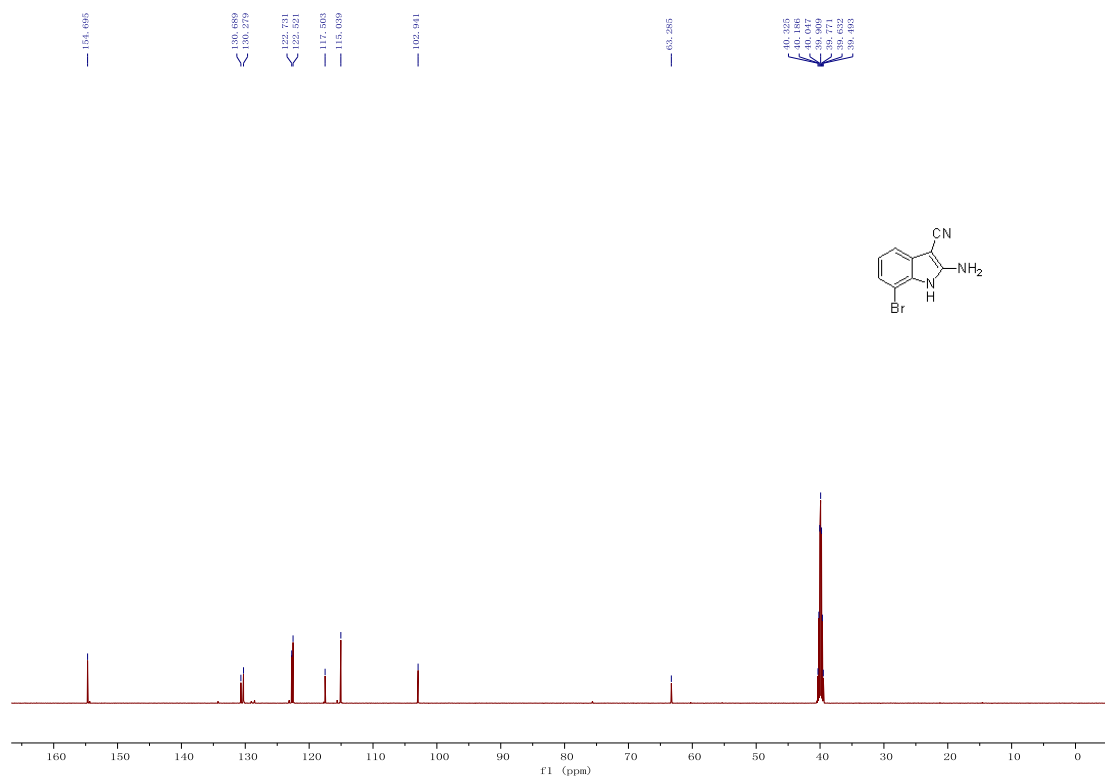

**2-Amino-7-chloro-1H-indole-3-carbonitrile (1c).** [ $^1\text{H-NMR}$ \_400 MHz\_(DMSO- $d_6$ : 3.36, 2.50 ppm)]

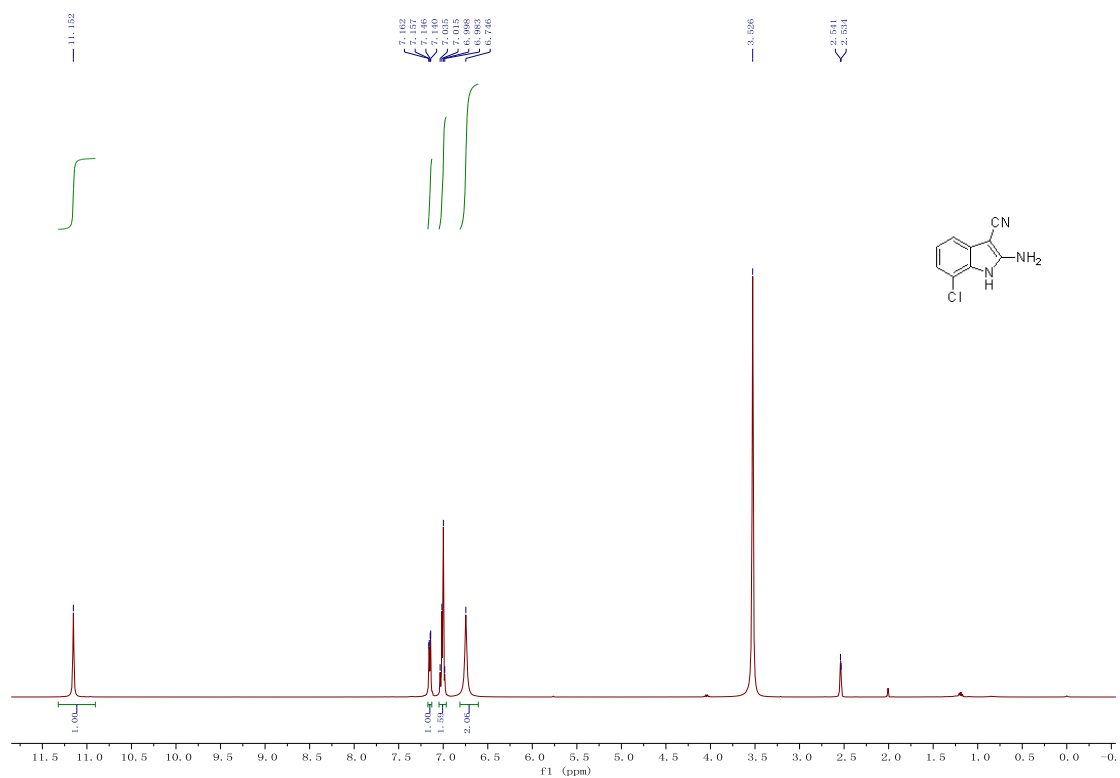

[<sup>13</sup>C\_NMR\_151 MHz\_(DMSO-*d*<sub>6</sub>: 39.5 ppm)]

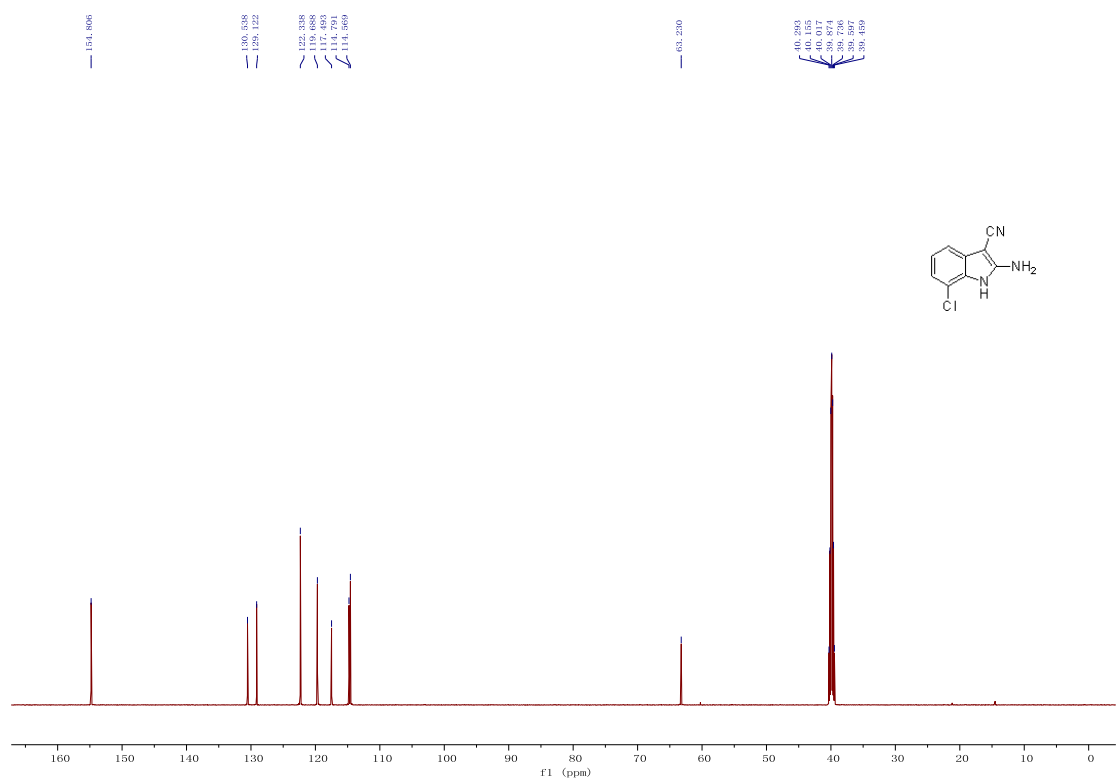

**2-Amino-7-methyl-1H-indole-3-carbonitrile (1d).** [<sup>1</sup>H\_NMR\_400 MHz\_(DMSO-*d*<sub>6</sub>: 3.36, 2.50 ppm)]

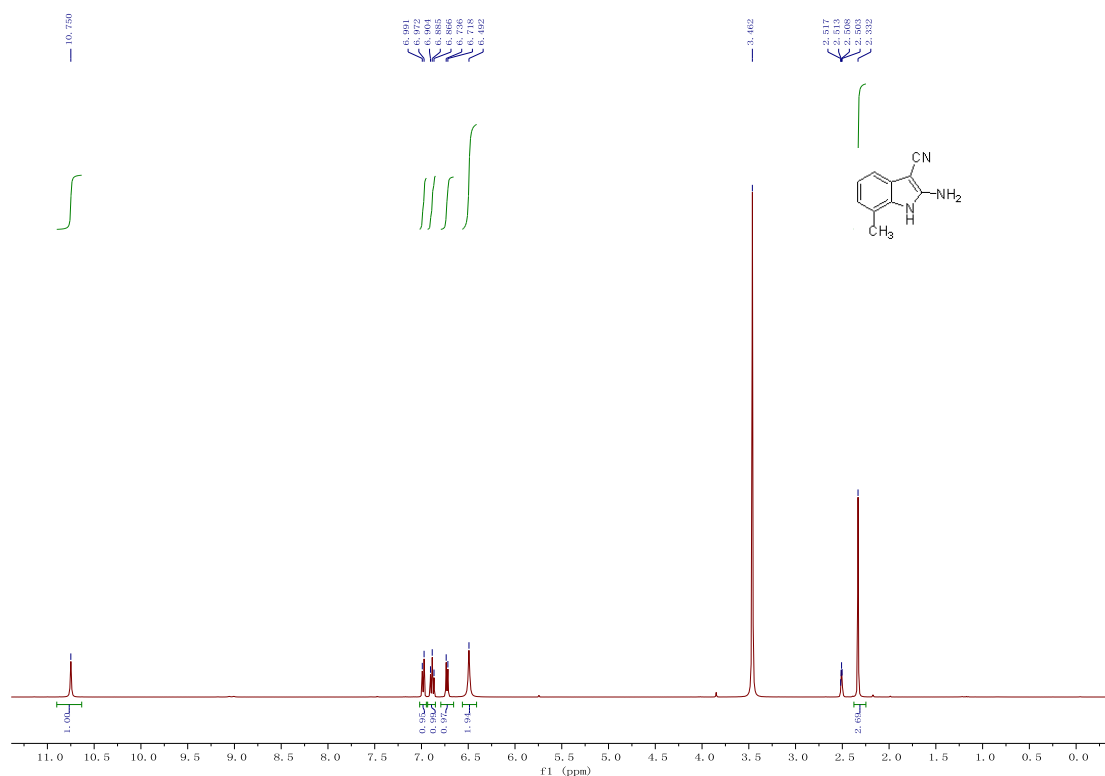

[<sup>13</sup>C\_NMR\_151 MHz\_(DMSO-*d*<sub>6</sub>: 39.5 ppm)]

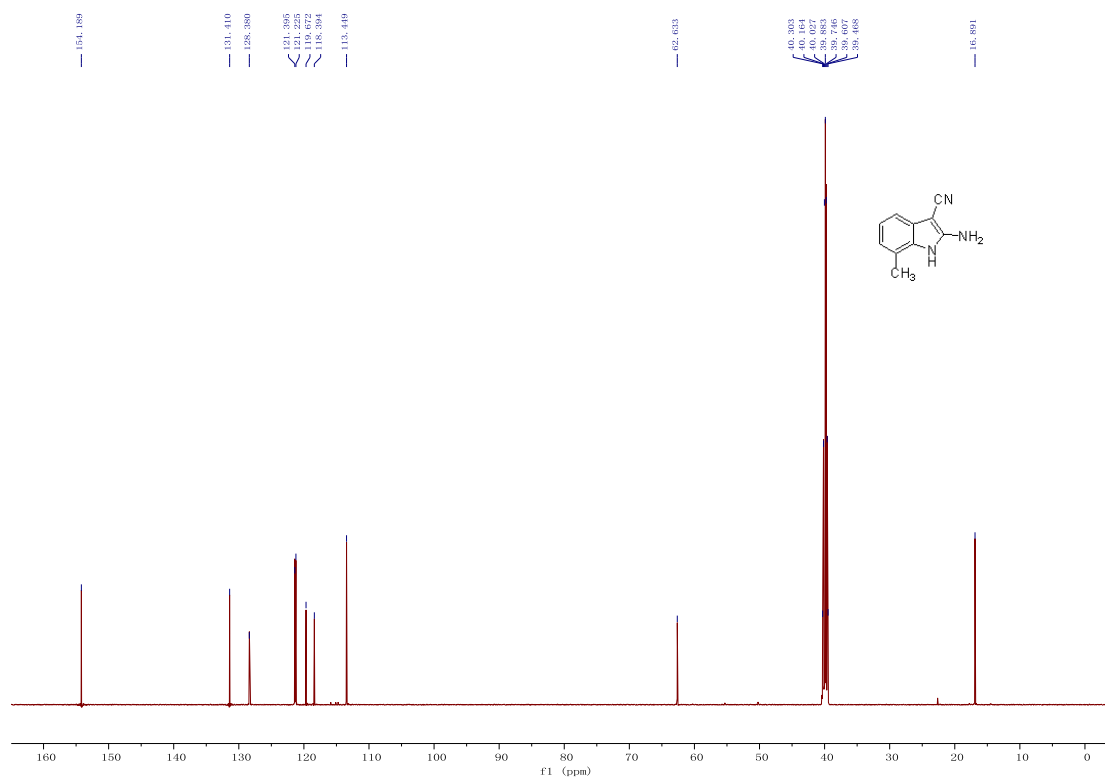

**2-Amino-6-fluoro-1H-indole-3-carbonitrile (1e).** [<sup>1</sup>H\_NMR\_400 MHz\_(DMSO-*d*<sub>6</sub>: 3.36, 2.50 ppm)]

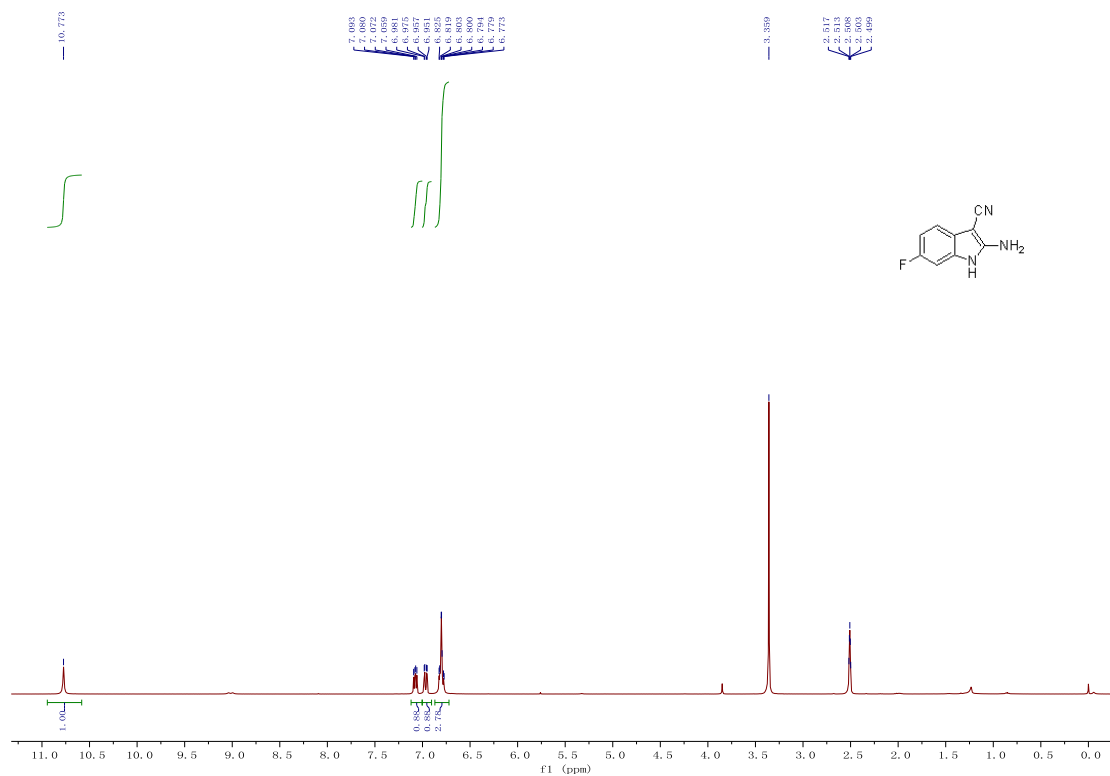

[<sup>13</sup>C\_NMR\_151 MHz\_(DMSO-*d*<sub>6</sub>: 39.5 ppm)]

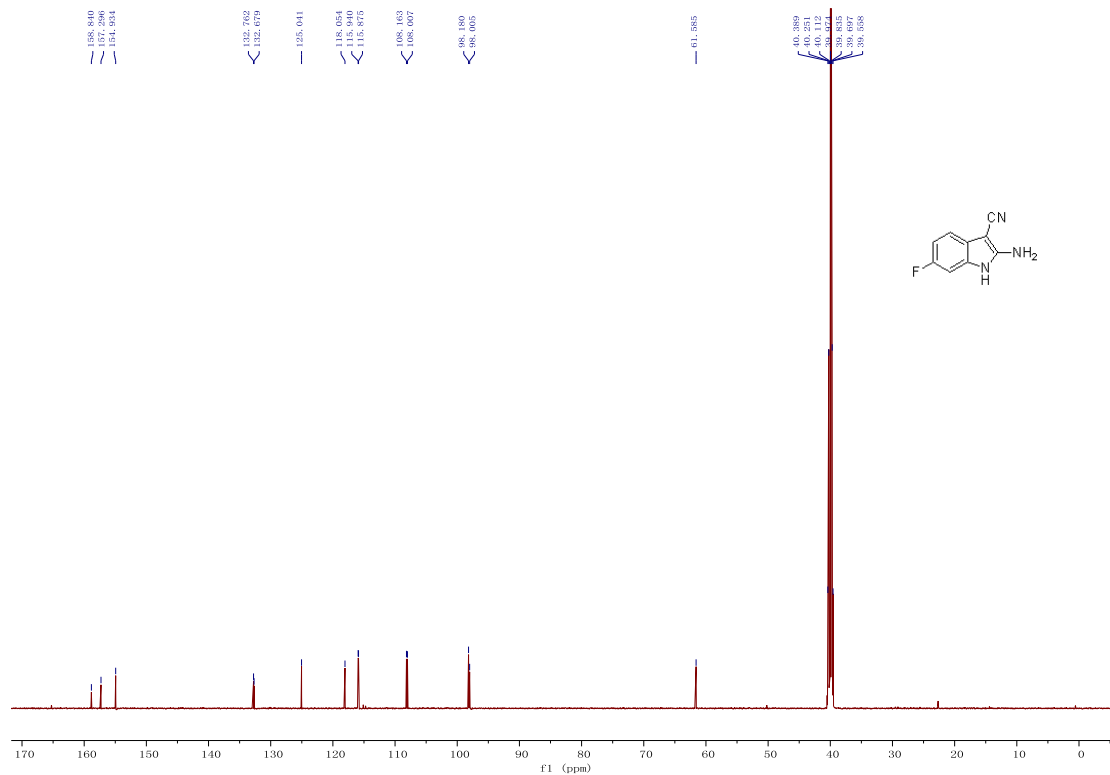

[<sup>19</sup>F\_NMR\_565 MHz]

123.815  
123.824  
123.833  
123.860

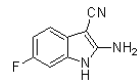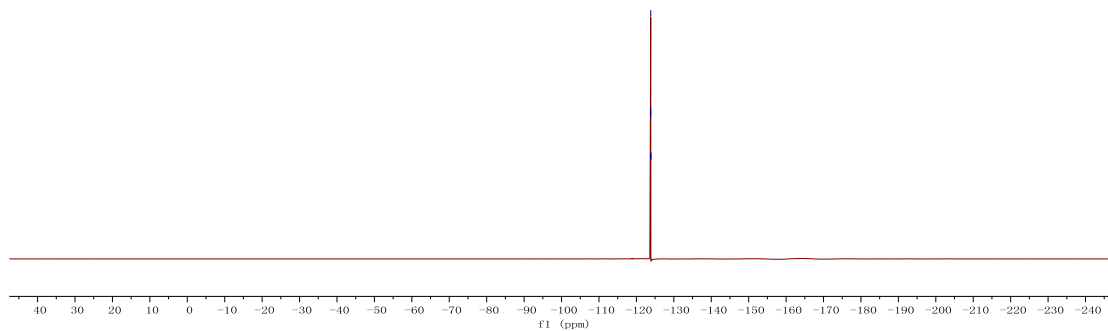



**2-Amino-6-methyl-1H-indole-3-carbonitrile (1f).** [ $^1\text{H-NMR}$ \_400 MHz\_(DMSO- $d_6$ : 3.36, 2.50 ppm)]

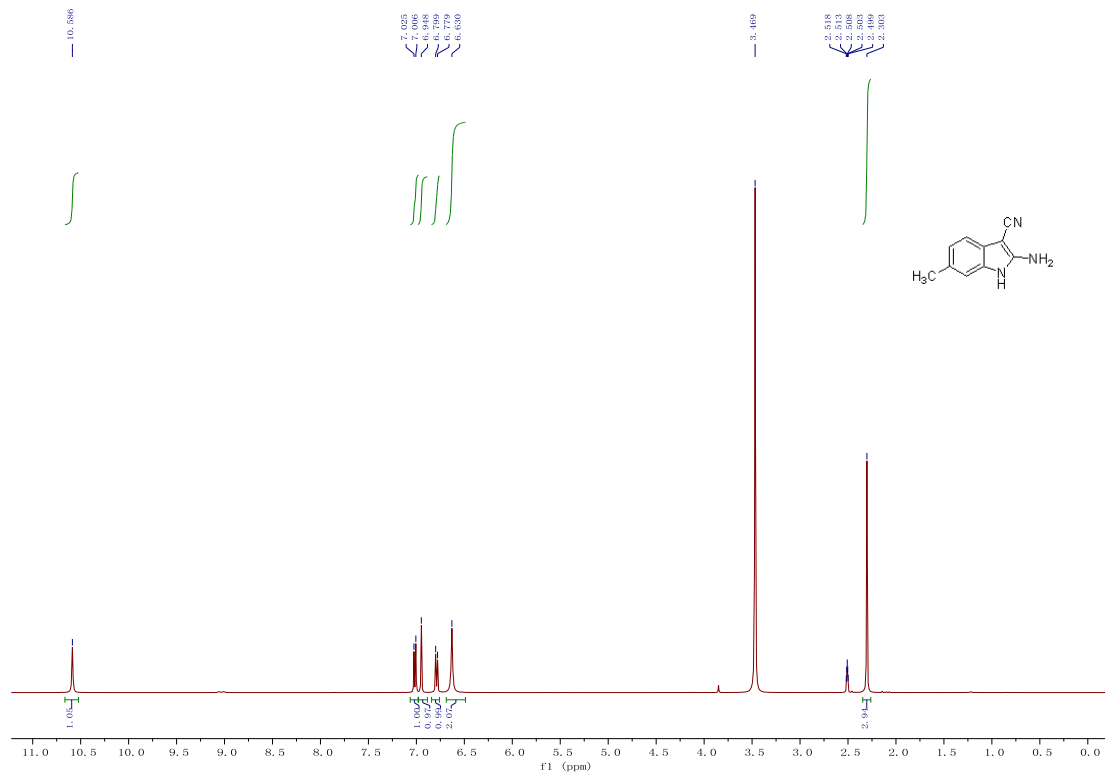

**[ $^{13}\text{C-NMR}$ \_151 MHz\_(DMSO- $d_6$ : 39.5 ppm)]**

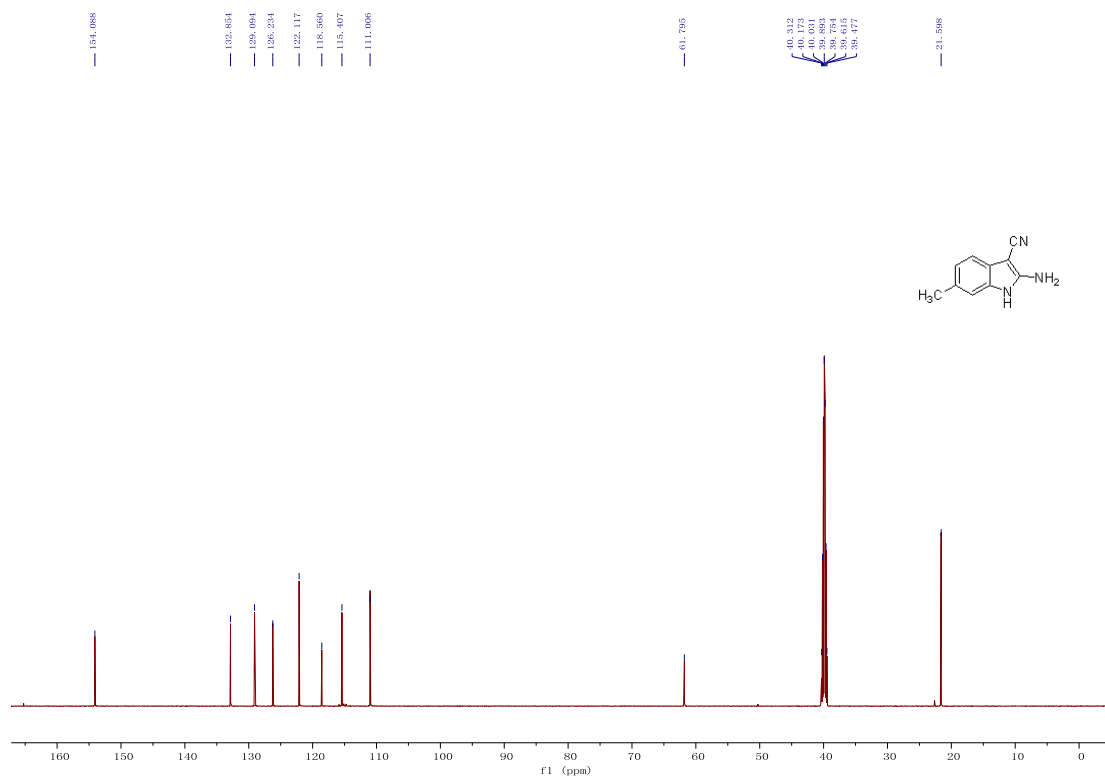

**2-Amino-5-chloro-1H-indole-3-carbonitrile (1g).** [ $^1\text{H-NMR}$ \_400 MHz\_(DMSO- $d_6$ : 3.36, 2.50 ppm)]

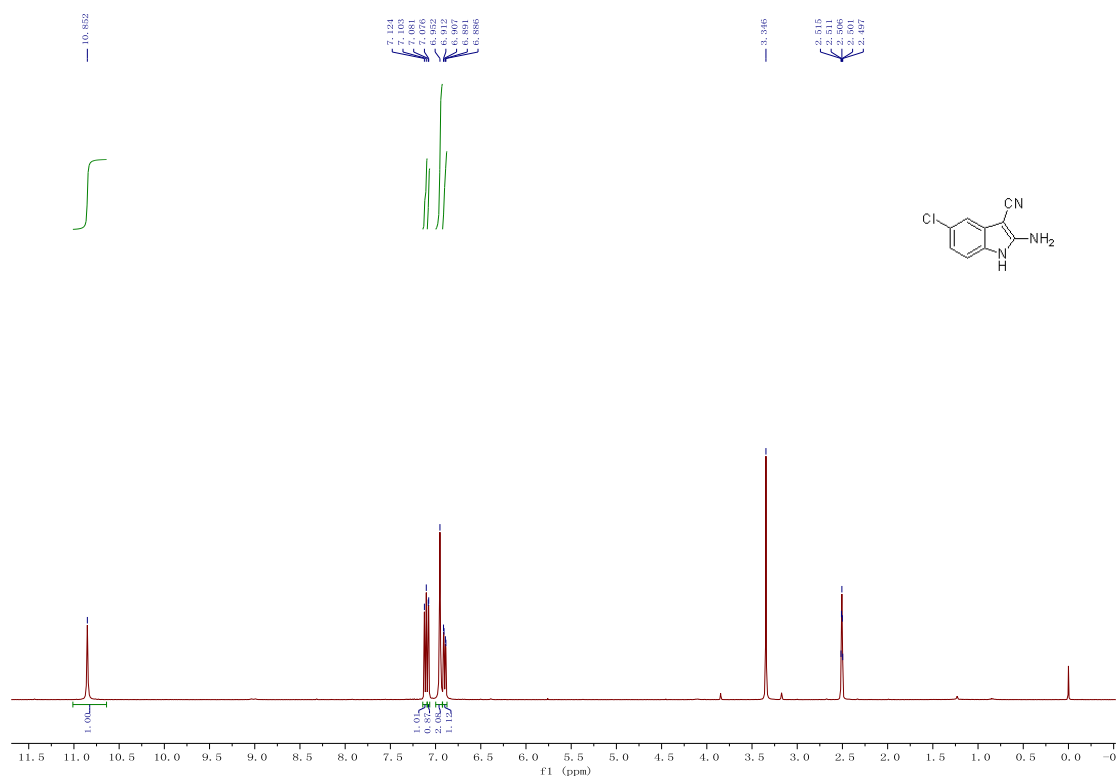

[<sup>13</sup>C\_NMR\_151 MHz\_(DMSO-*d*<sub>6</sub>: 39.5 ppm)]

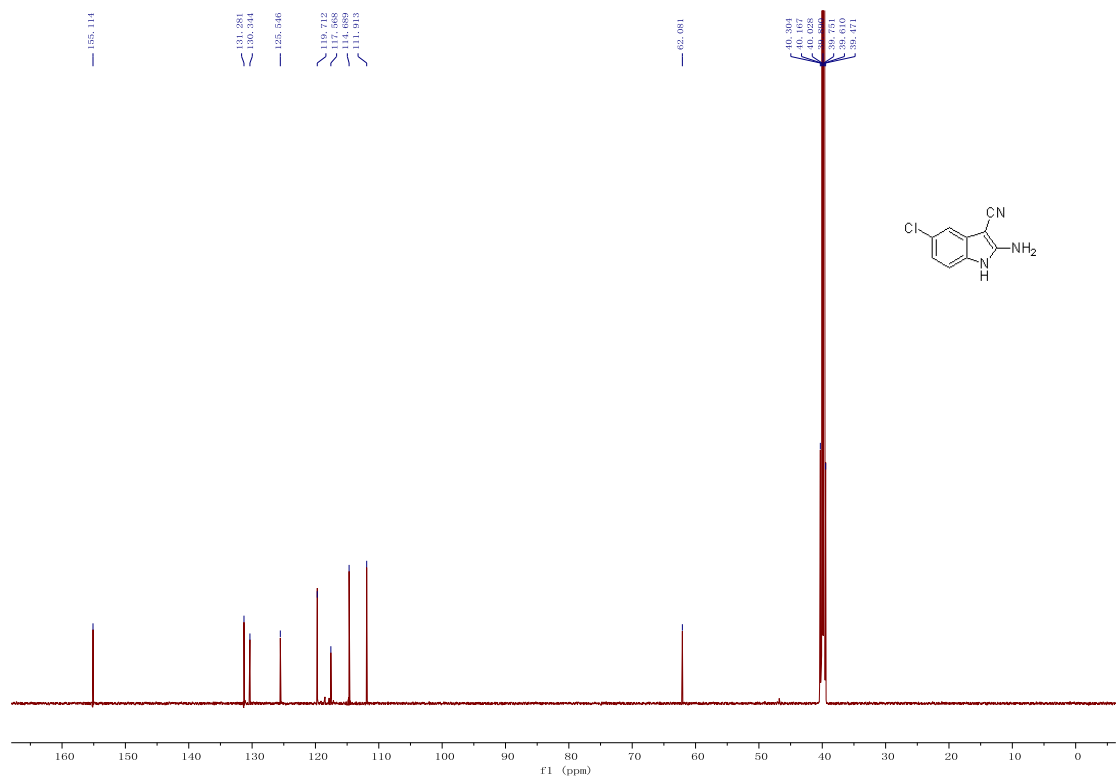

**2-Amino-5-methyl-1H-indole-3-carbonitrile (1h).** [<sup>1</sup>H\_NMR\_400 MHz\_(DMSO-*d*<sub>6</sub>: 3.36, 2.50 ppm)]

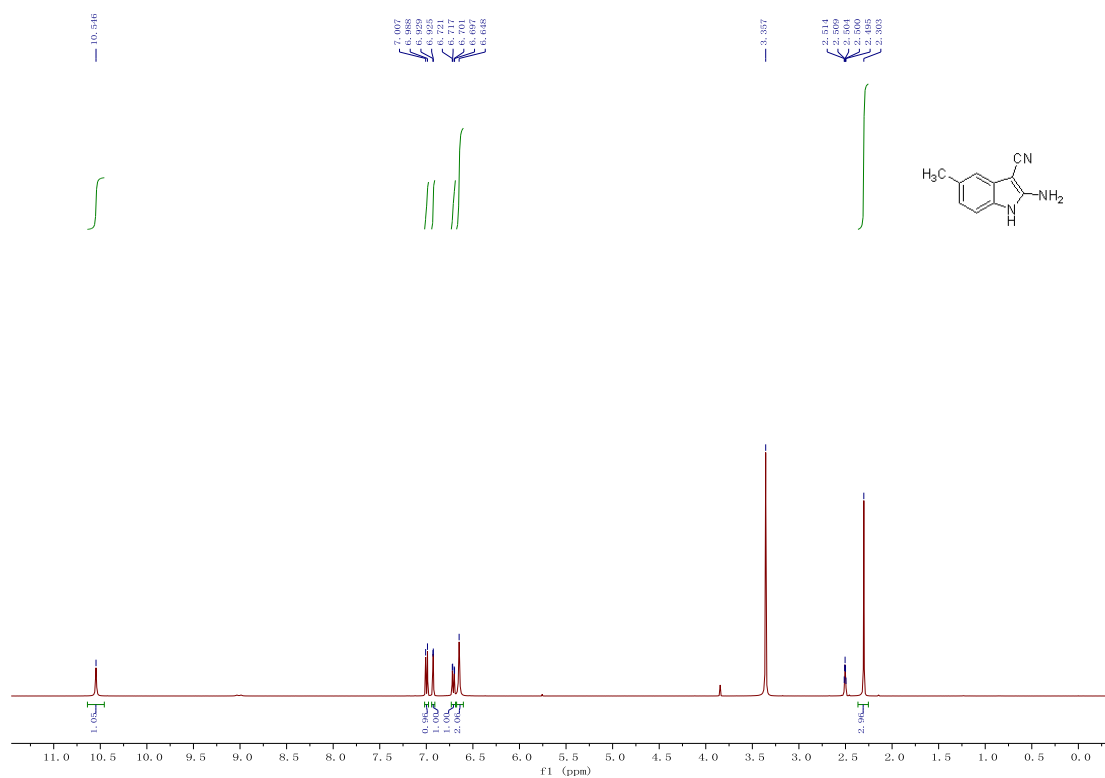

[<sup>13</sup>C\_NMR\_151 MHz\_(DMSO-*d*<sub>6</sub>: 39.5 ppm)]

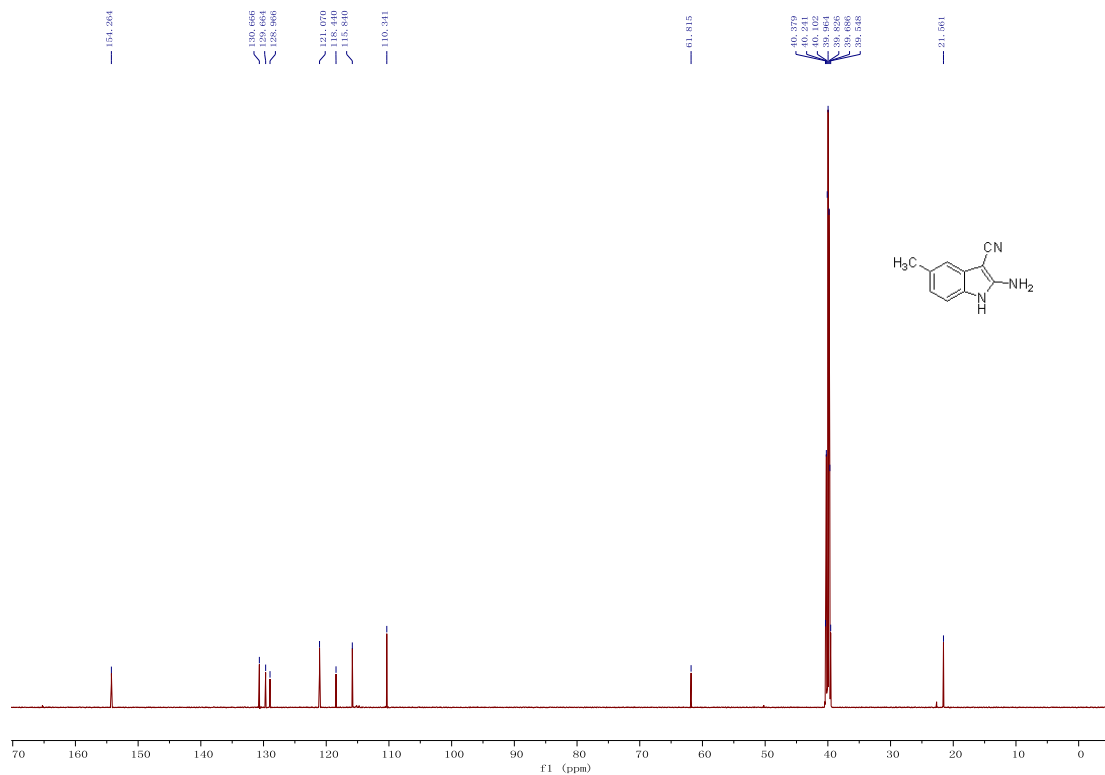

**2-Amino-5-methoxy-1H-indole-3-carbonitrile (1i).** [<sup>1</sup>H\_NMR\_600 MHz\_(DMSO-*d*<sub>6</sub>: 3.36, 2.50 ppm)]

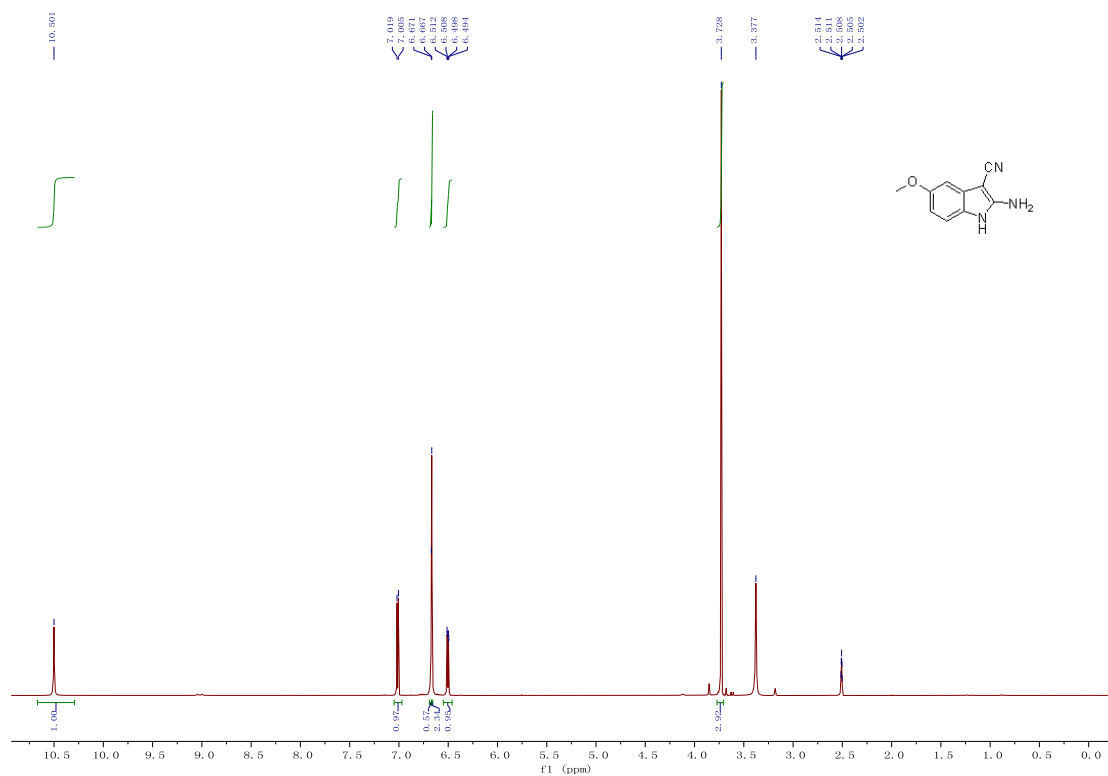

[<sup>13</sup>C\_NMR\_151 MHz\_(DMSO-*d*<sub>6</sub>: 39.5 ppm)]

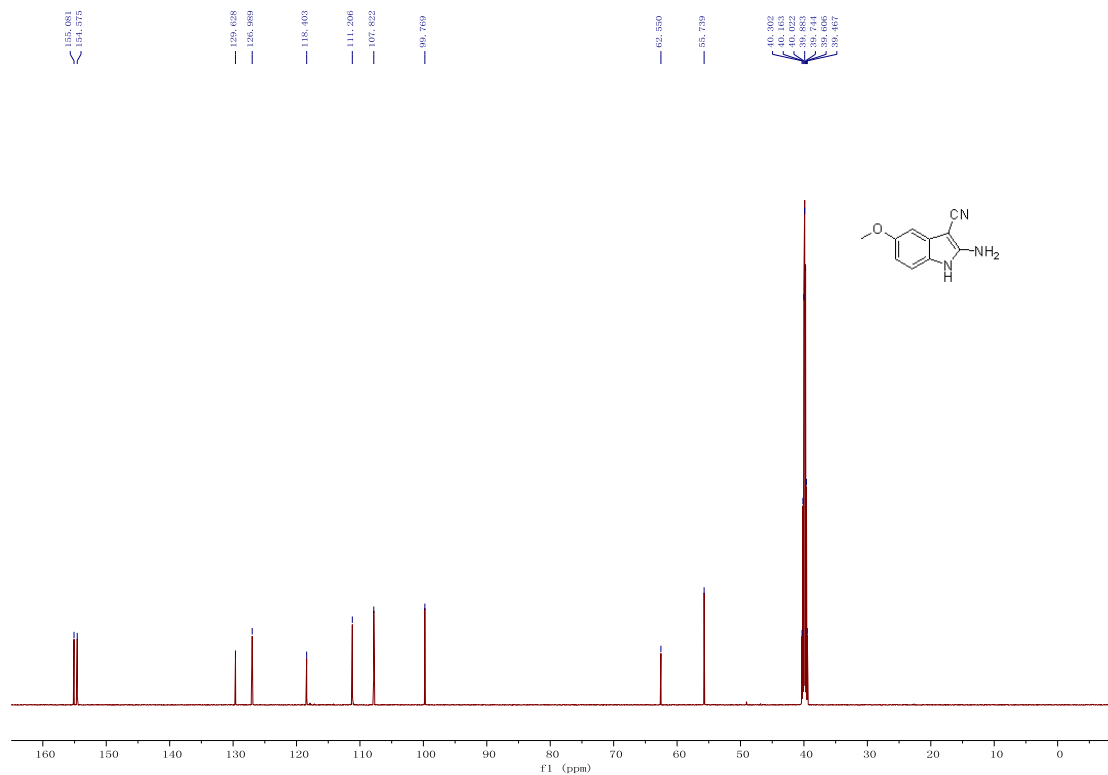

**2-Amino-4-chloro-1H-indole-3-carbonitrile (1j).** [<sup>1</sup>H\_NMR\_400 MHz\_(DMSO-*d*<sub>6</sub>: 3.36, 2.50 ppm)]

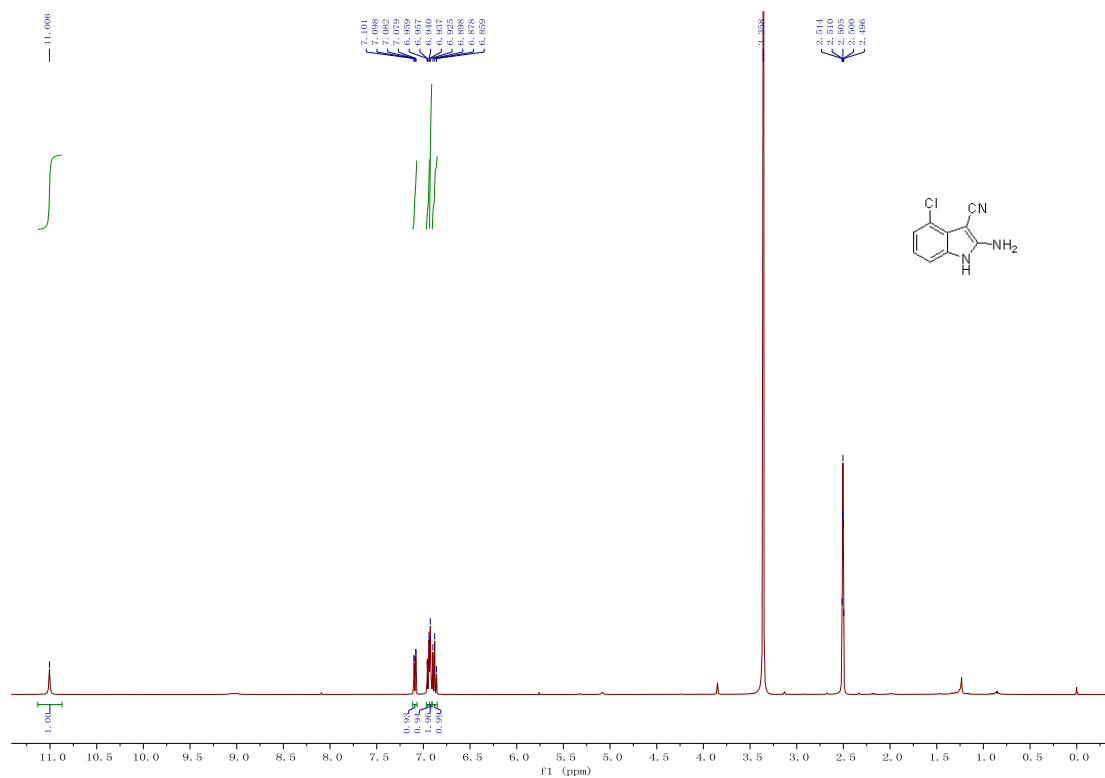

[<sup>13</sup>C\_NMR\_151 MHz\_(DMSO-d<sub>6</sub>: 39.5 ppm)]

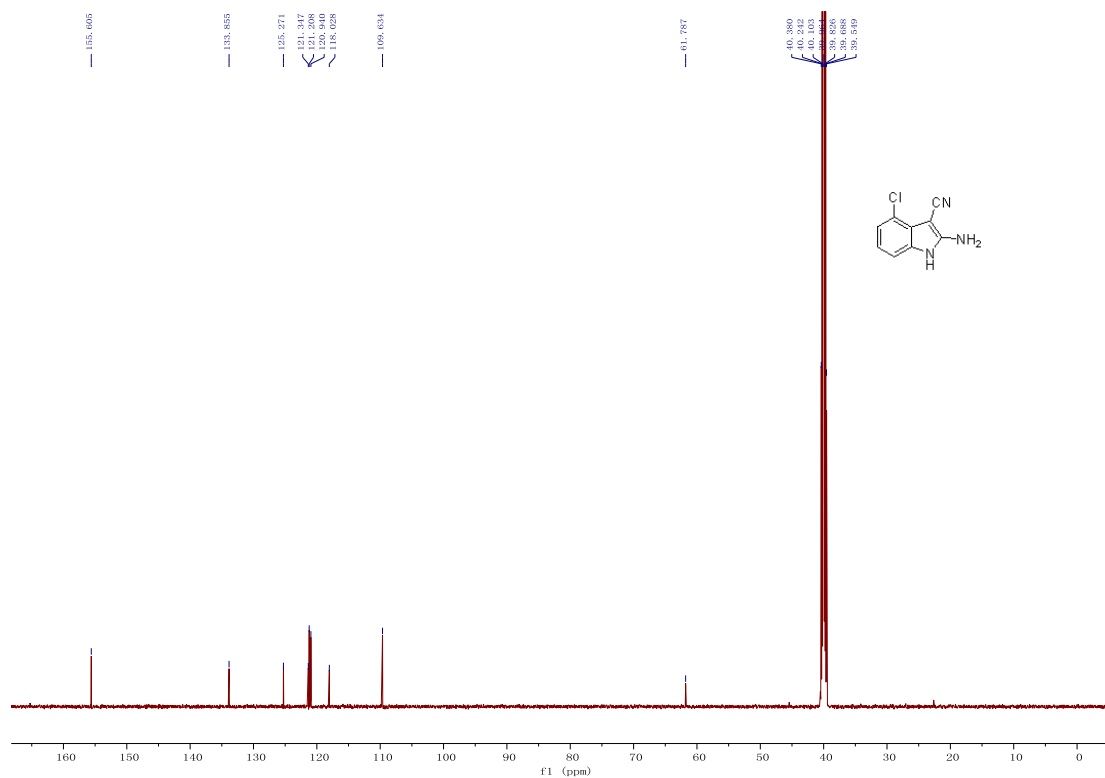

**2-Amino-4-fluoro-1H-indole-3-carbonitrile (1k).** [ $^1\text{H\_NMR}$ \_400 MHz\_(DMSO- $d_6$ : 3.36, 2.50 ppm)]

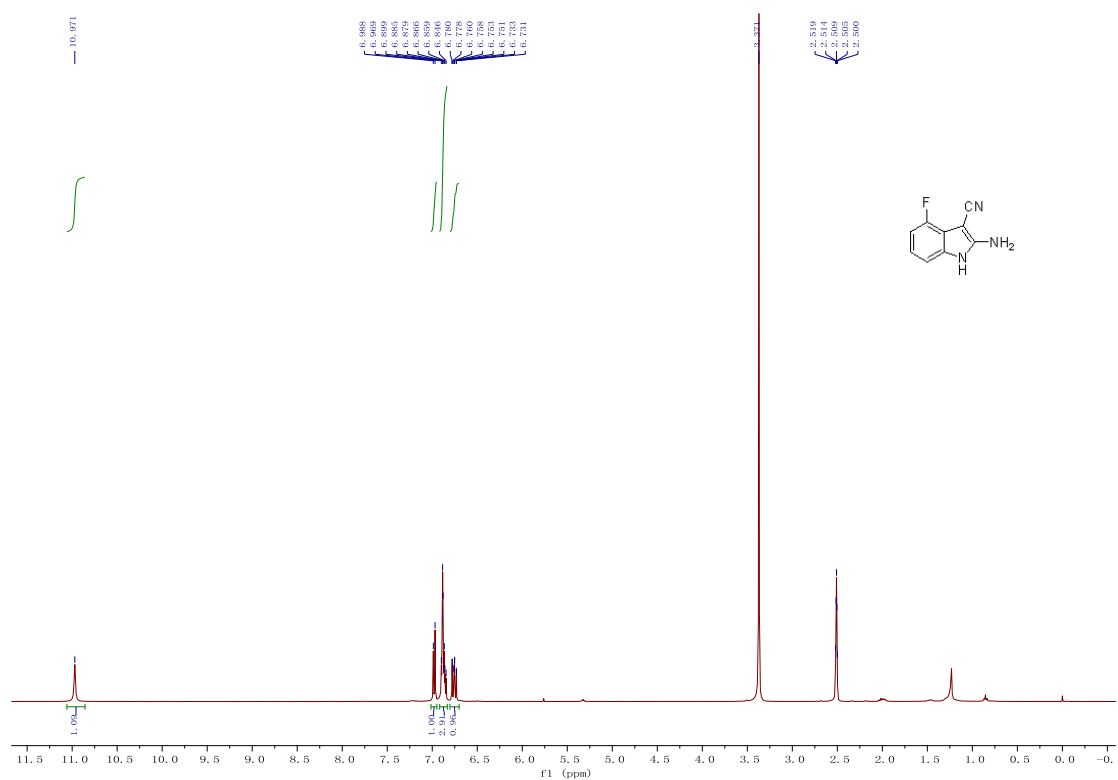

[ $^{13}\text{C\_NMR}$ \_151 MHz\_(DMSO- $d_6$ : 39.5 ppm)]

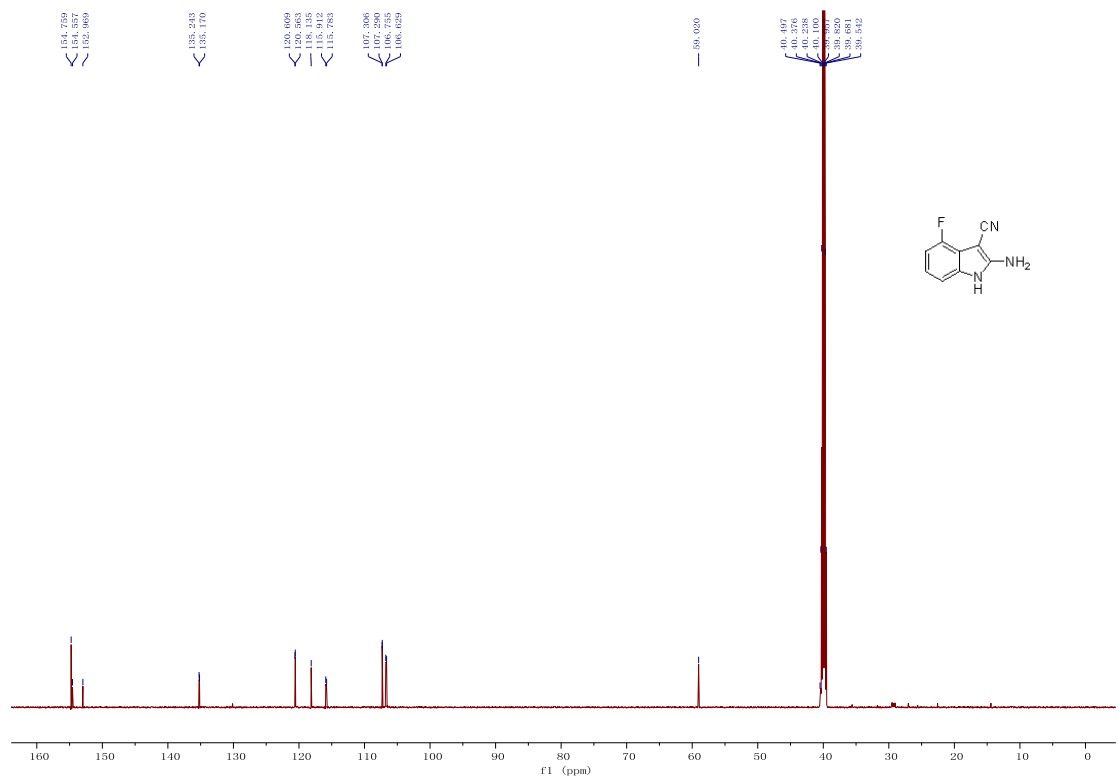

[ $^{19}\text{F\_NMR}$ \_565 MHz]

128.448  
128.463  
128.477  
128.489

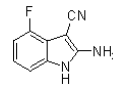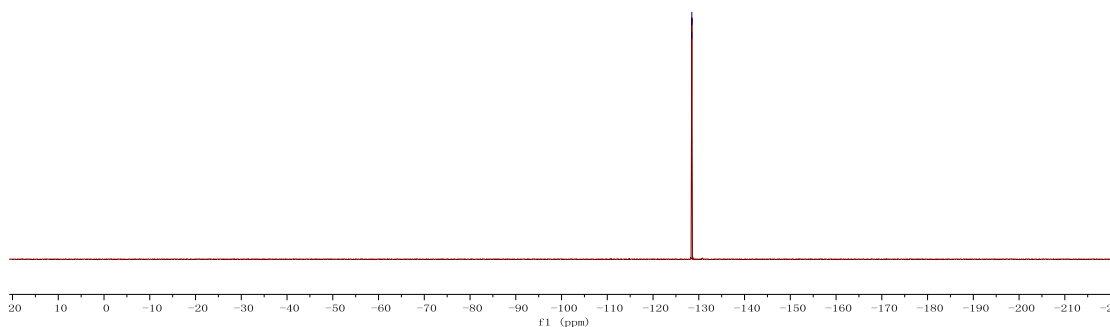

**2-Amino-4-methyl-1H-indole-3-carbonitrile (11).** [<sup>1</sup>H\_NMR\_400 MHz\_(DMSO-*d*<sub>6</sub>: 3.36, 2.50 ppm)]

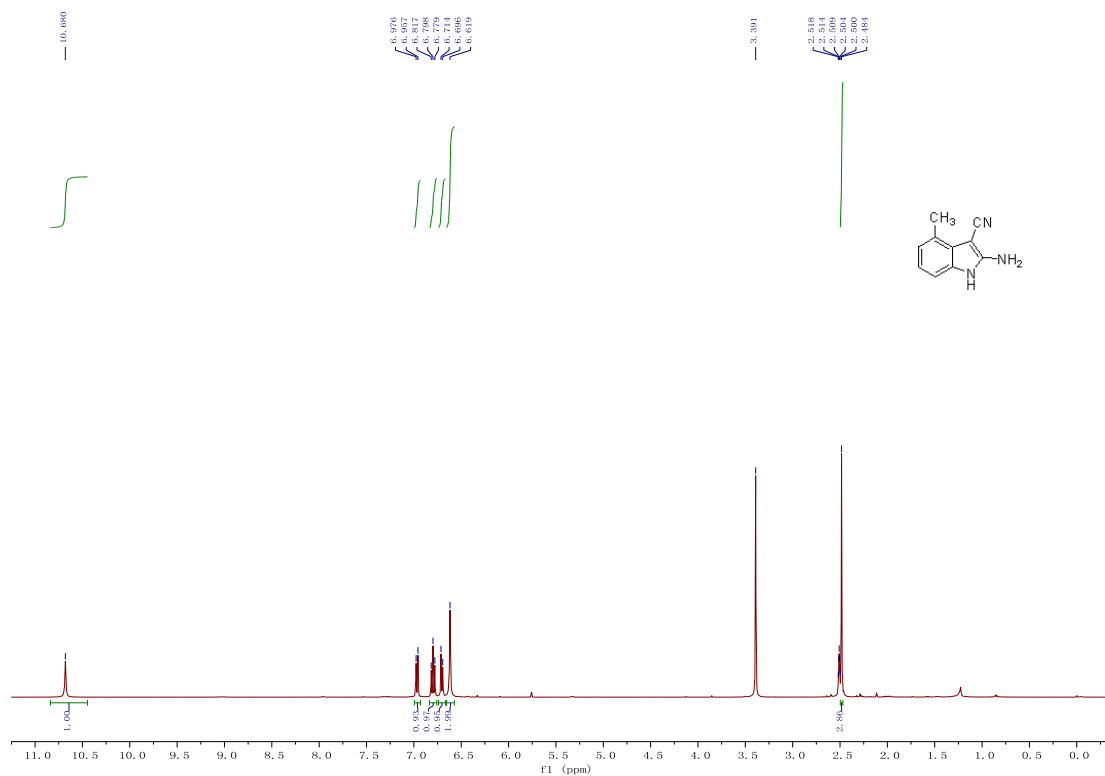

**[<sup>13</sup>C\_NMR\_151 MHz\_(DMSO-*d*<sub>6</sub>: 39.5 ppm)]**

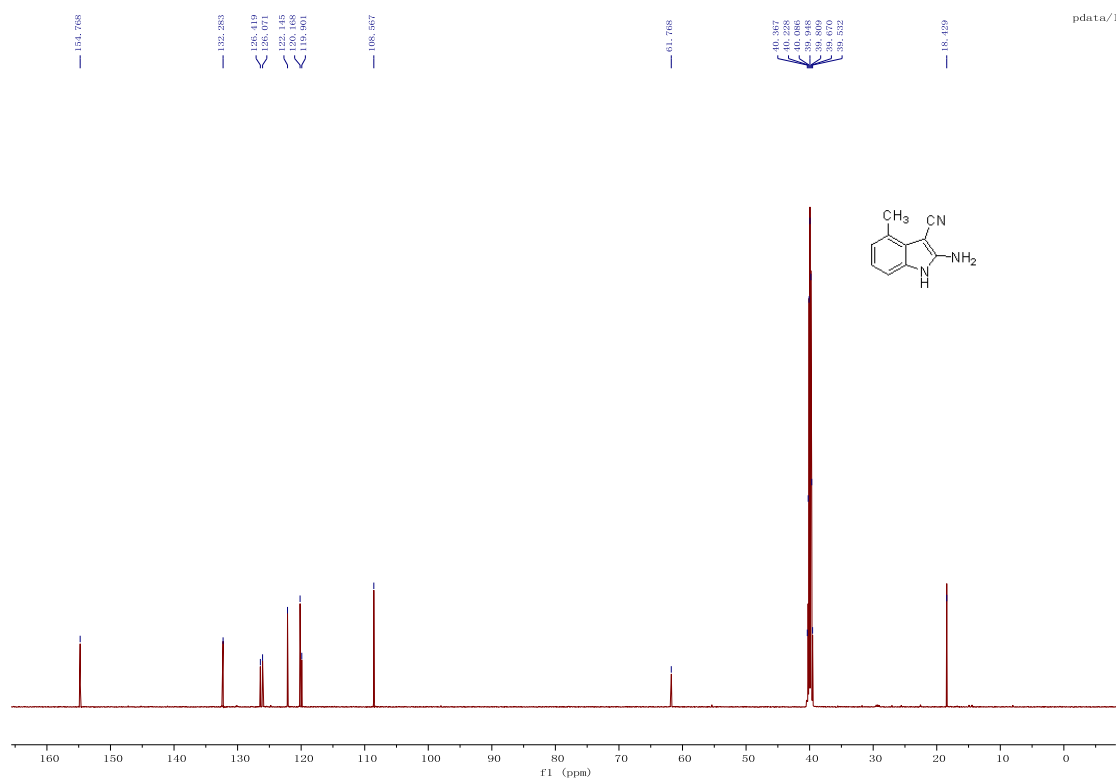

**(R)-4-Oxo-2-phenyl-1,2,3,4-tetrahydropyrimido[1,2-a]indole-10-carbonitrile (3a).** [<sup>1</sup>H\_NMR\_400 MHz\_( DMSO-*d*<sub>6</sub>: 3.35, 2.50 ppm)]



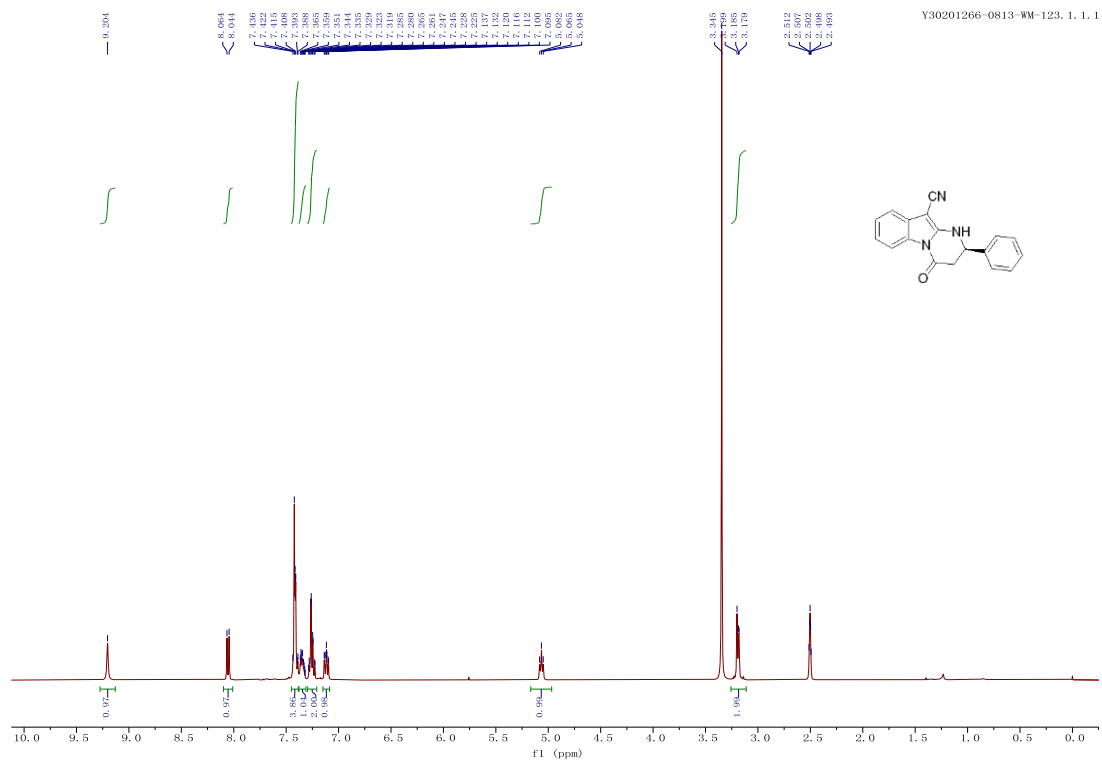

[<sup>13</sup>C\_NMR\_151 MHz\_(DMSO-d<sub>6</sub>: 39.5 ppm)]

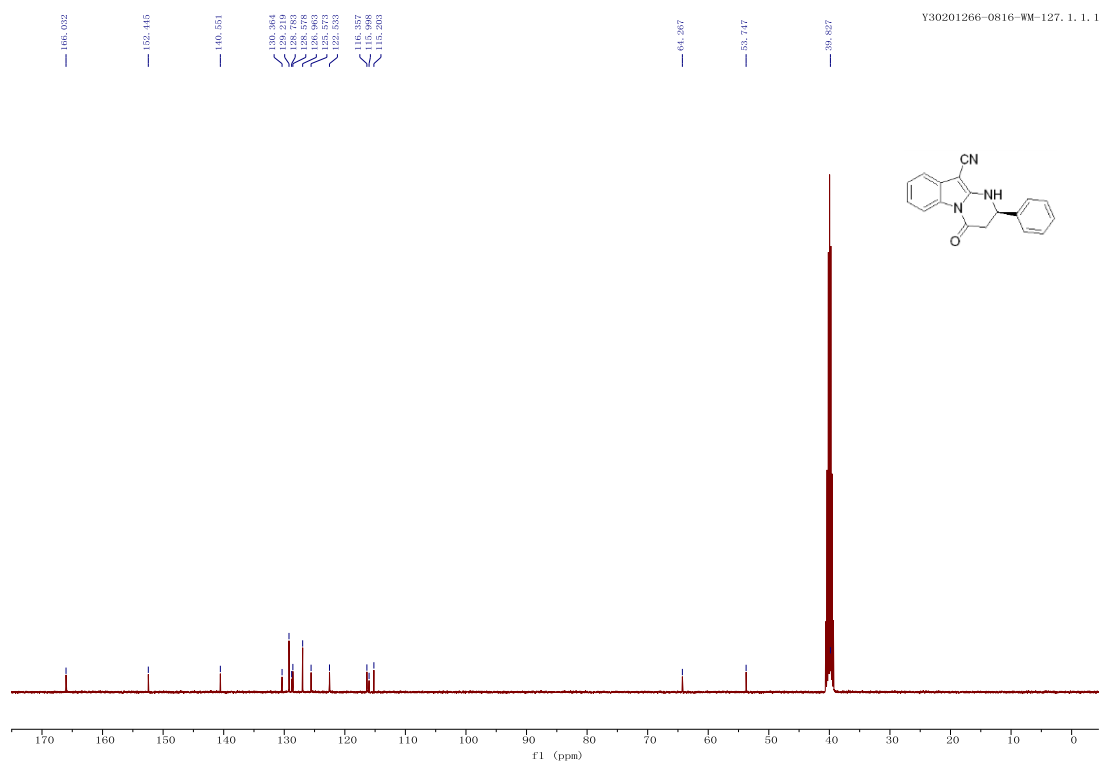

**(R)-1-Acetyl-6-bromo-4-oxo-2-phenyl-1,2,3,4-tetrahydropyrimido[1,2-a]indole-**

**10-carbonitrile (3b').** [<sup>1</sup>H\_NMR\_400 MHz\_(CDCl<sub>3</sub>: 7.26 ppm)]

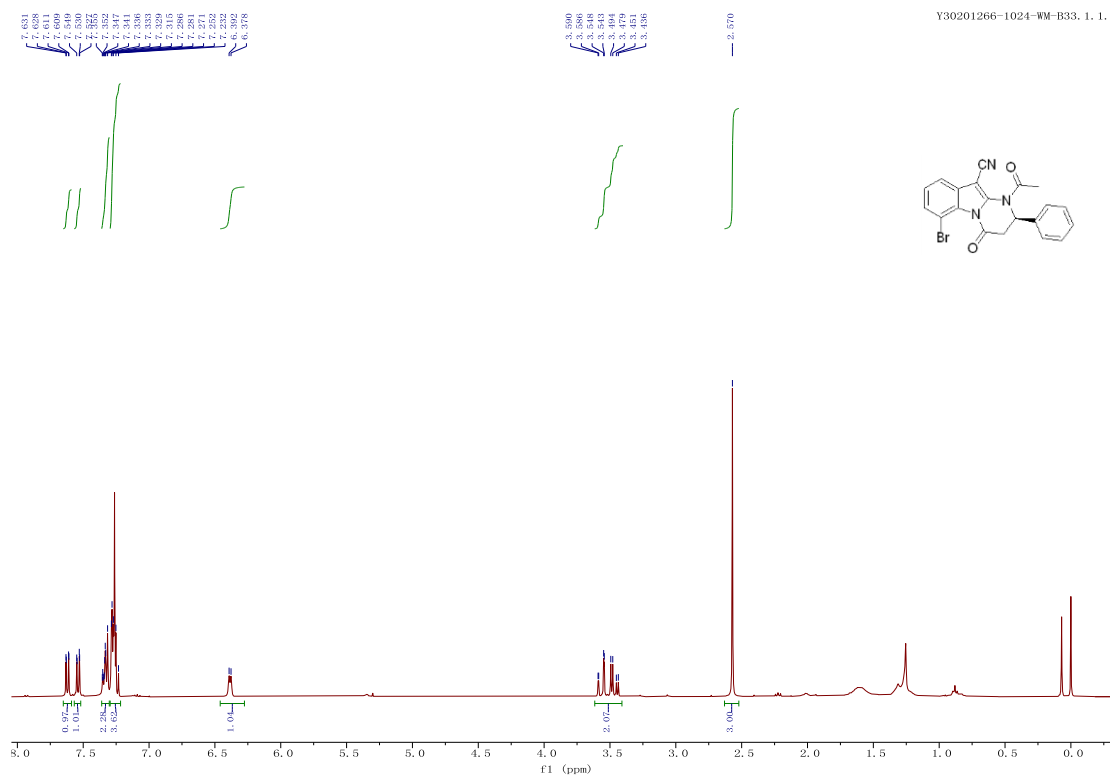

**[<sup>13</sup>C\_NMR\_151 MHz\_(CDCl<sub>3</sub>: 77.00 ppm)]**

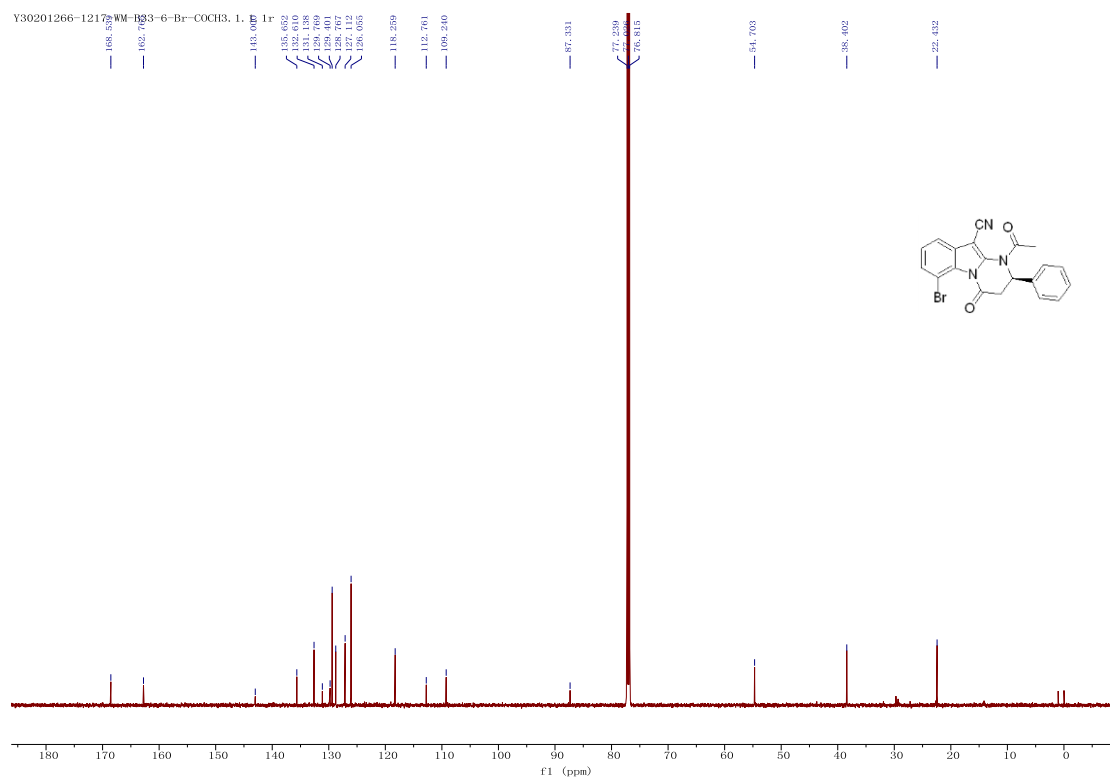

**(R)-1-Acetyl-6-chloro-4-oxo-2-phenyl-1,2,3,4-tetrahydropyrimido[1,2-a]indole-10-carbonitrile (3c').** [<sup>1</sup>H\_NMR\_400 MHz\_(CDCl<sub>3</sub>: 7.26 ppm)]

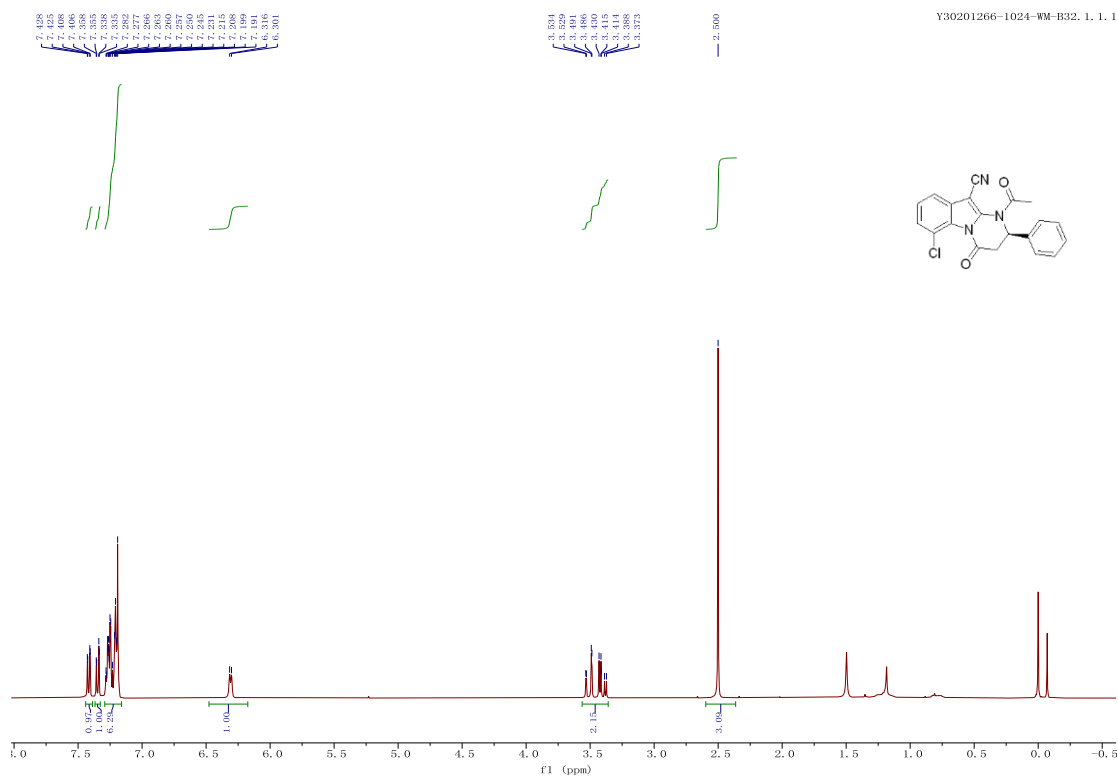

[<sup>13</sup>C\_NMR\_151 MHz\_(CDCl<sub>3</sub>: 77.00 ppm)]

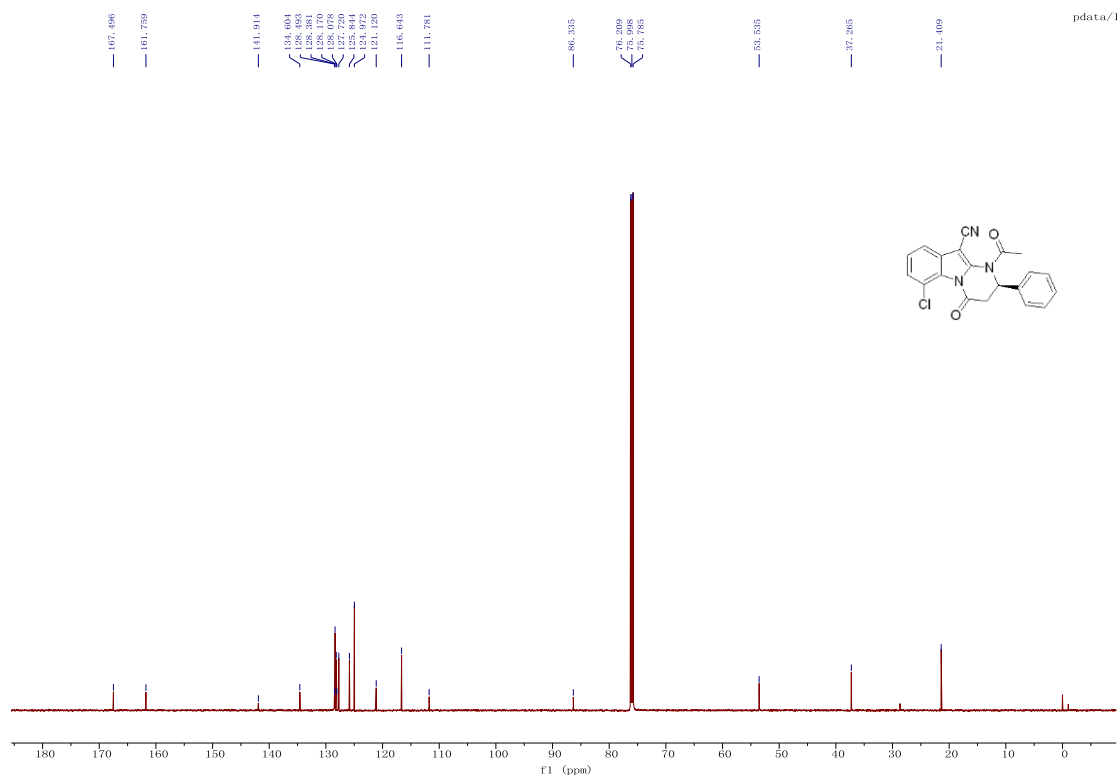

**(R)-1-Acetyl-6-methyl-4-oxo-2-phenyl-1,2,3,4-tetrahydropyrimido[1,2-a]indole-10-carbonitrile (3d').** [<sup>1</sup>H\_NMR\_600 MHz\_(CDCl<sub>3</sub>: 7.26 ppm)]

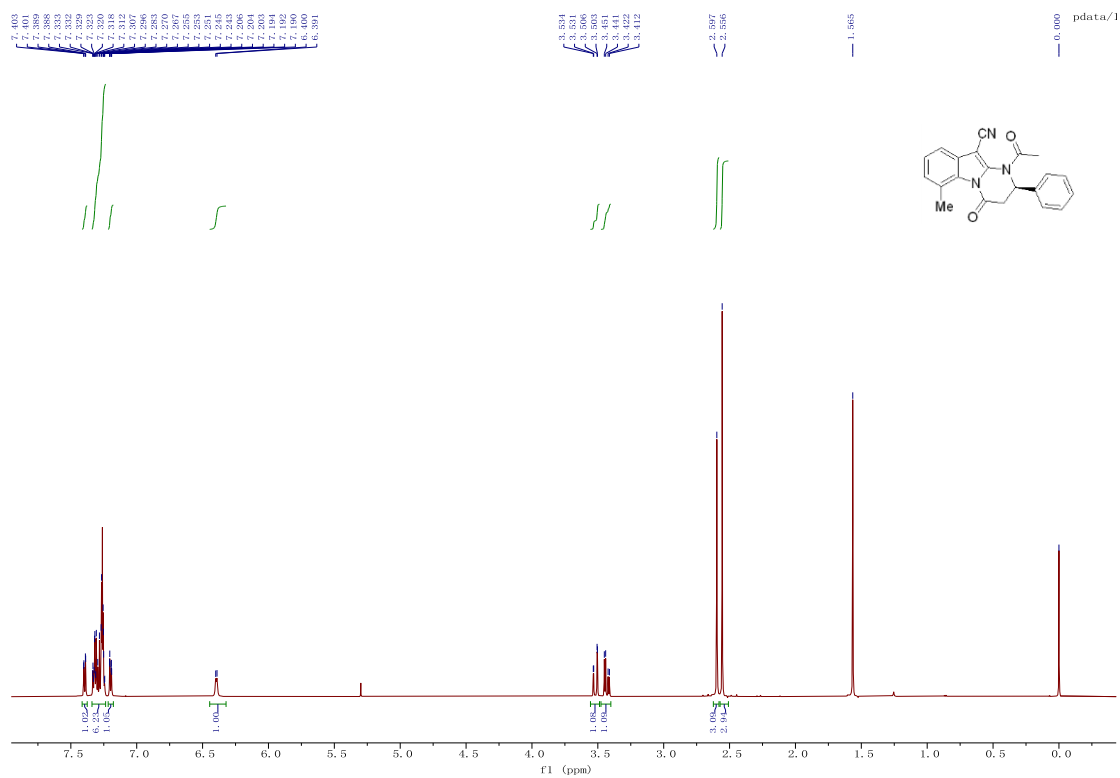

[<sup>13</sup>C\_NMR\_151 MHz\_(CDCl<sub>3</sub>: 77.00 ppm)]

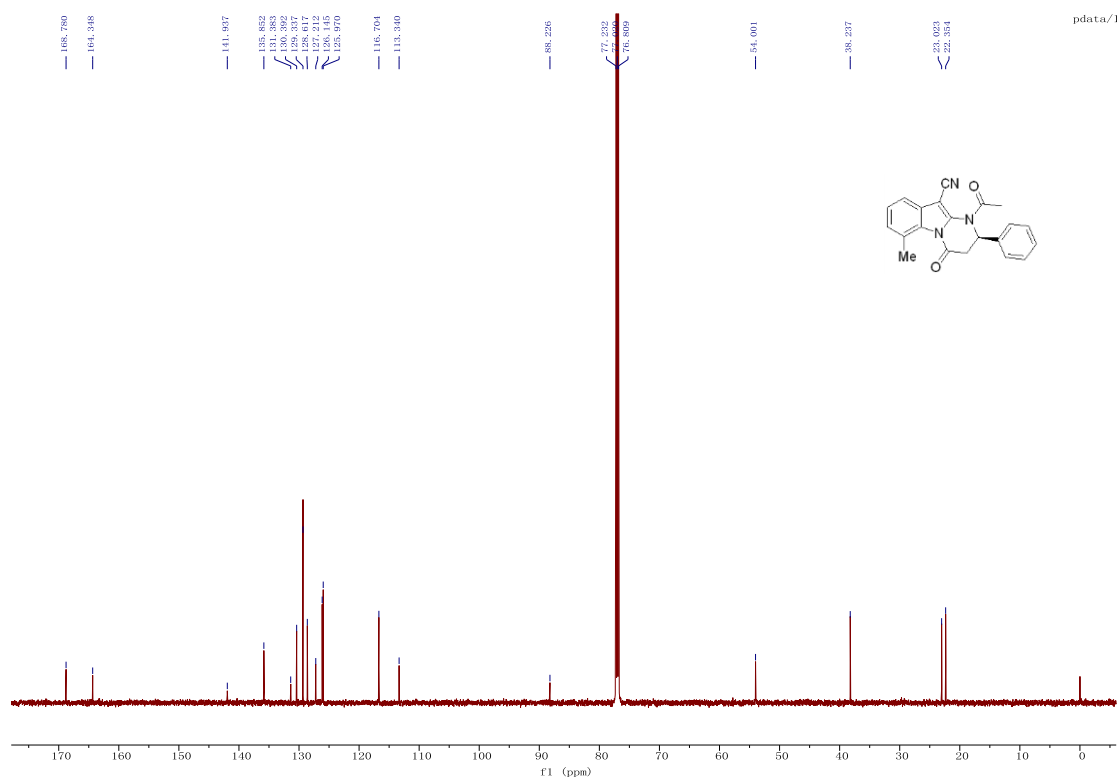

**(R)-7-Fluoro-4-oxo-2-phenyl-1,2,3,4-tetrahydropyrimido[1,2-a]indole-10-carbonitrile (3e).** [<sup>1</sup>H\_NMR\_600 MHz\_(DMSO-*d*<sub>6</sub>: 3.36, 2.50 ppm)]

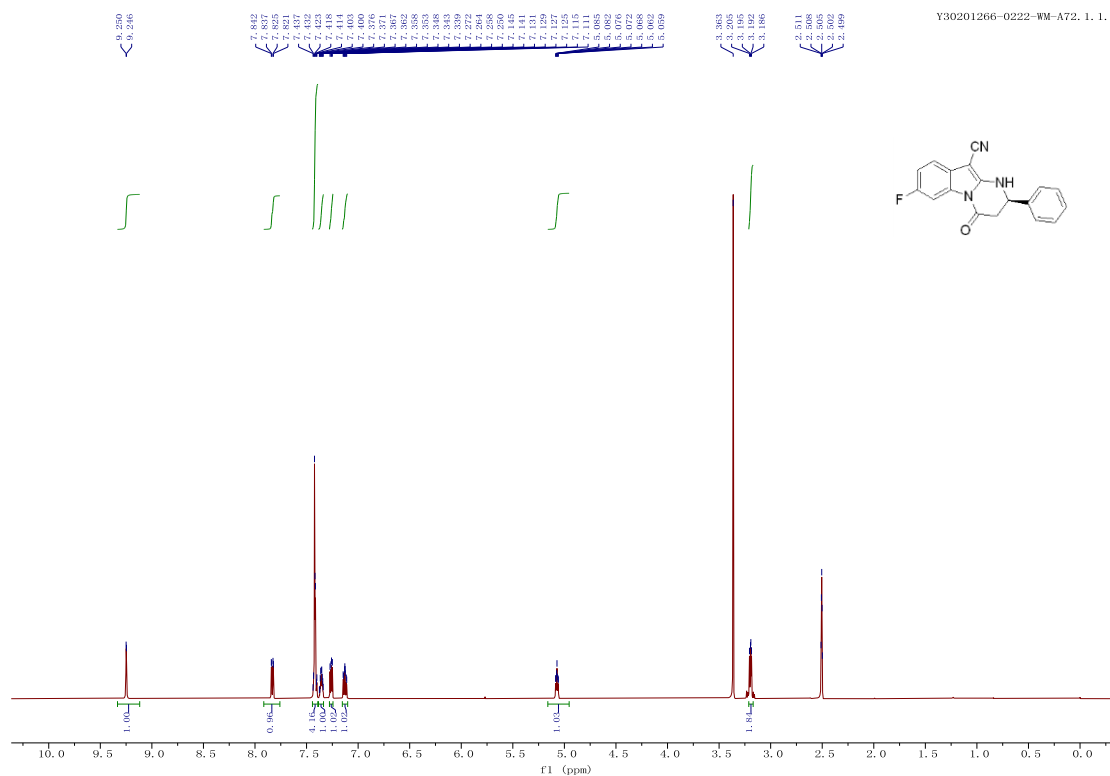

[<sup>13</sup>C\_NMR\_151 MHz\_(DMSO-d<sub>6</sub>: 39.5 ppm)]

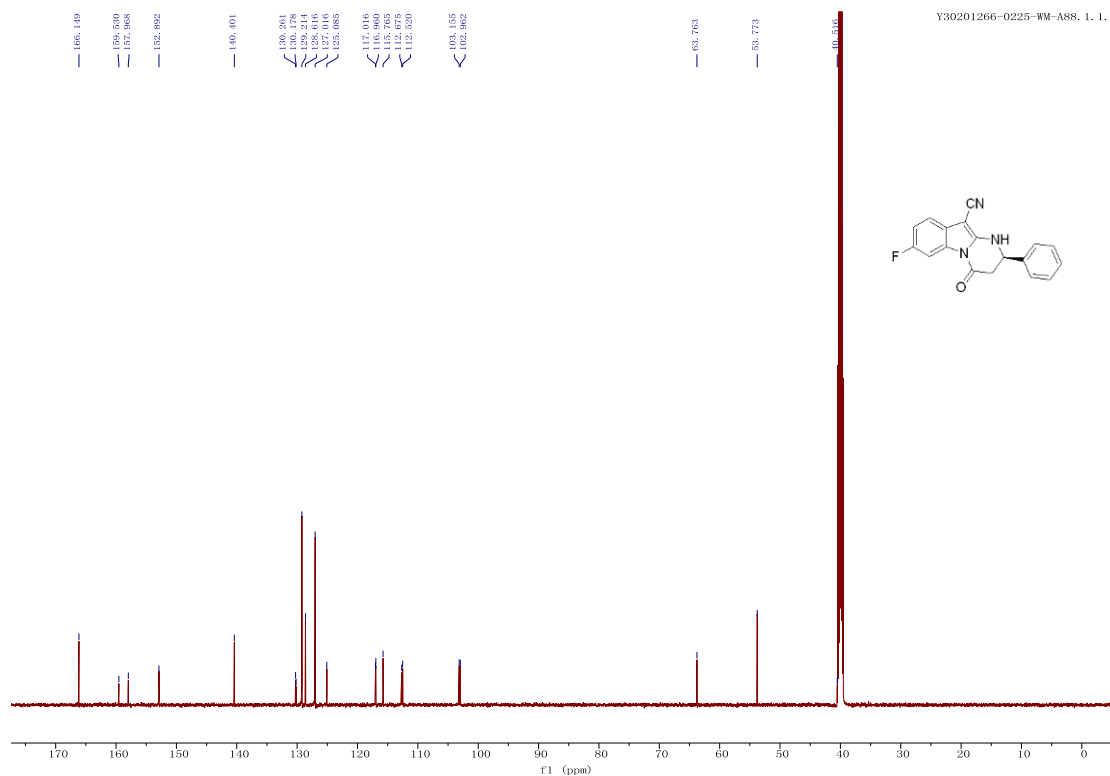

[<sup>19</sup>F\_NMR\_565 MHz]

120.364  
120.362

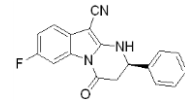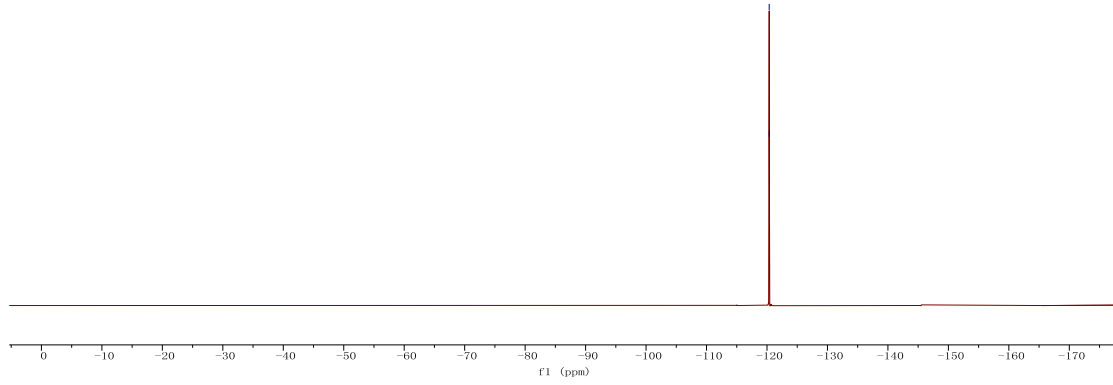

**(R)-7-Methyl-4-oxo-2-phenyl-1,2,3,4-tetrahydropyrimido[1,2-a]indole-10-carbonitrile (3f).** [<sup>1</sup>H\_NMR\_400 MHz\_(DMSO-d<sub>6</sub>: 3.36, 2.50 ppm)]

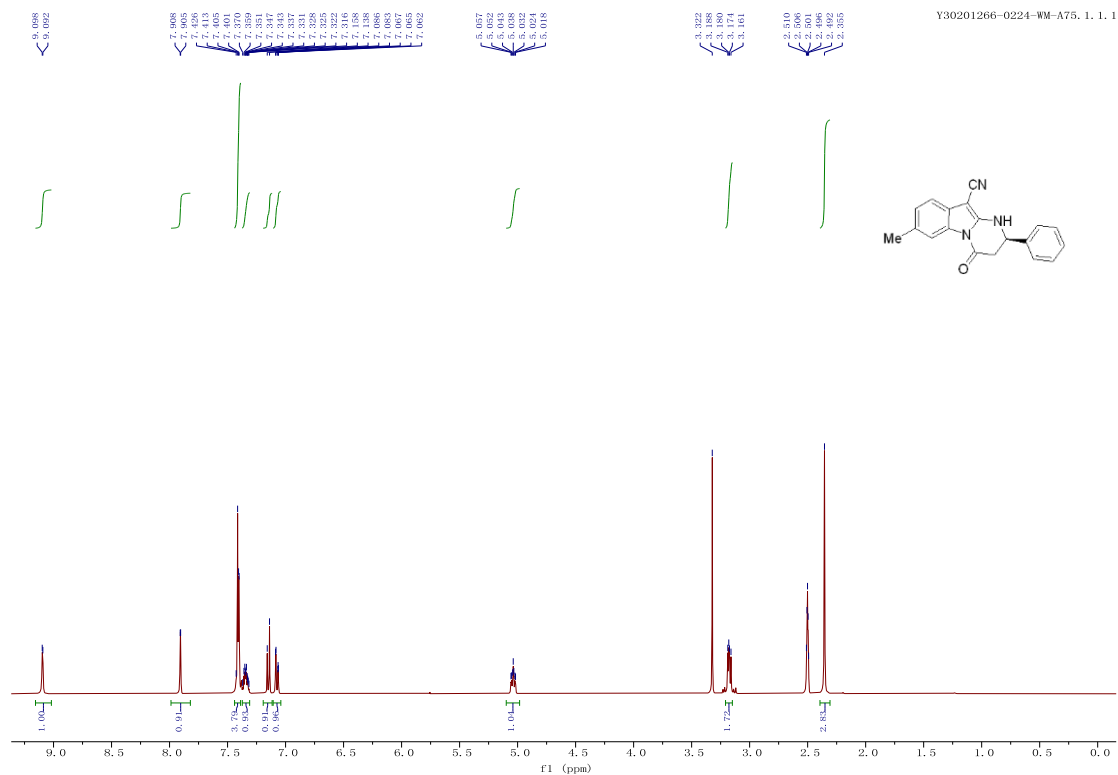

[<sup>13</sup>C\_NMR\_151 MHz\_(DMSO-d<sub>6</sub>: 39.5 ppm)]

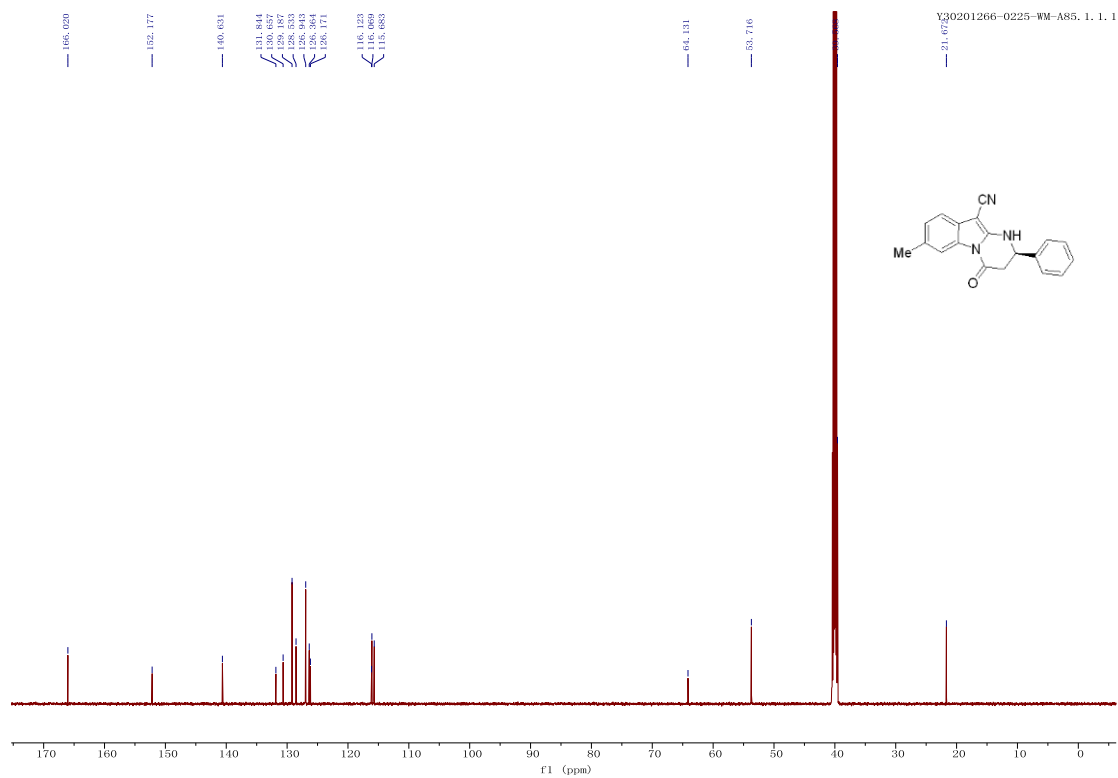

**(R)-1-Acetyl-8-chloro-4-oxo-2-phenyl-1,2,3,4-tetrahydropyrimido[1,2-a]indole-10-carbonitrile (3g<sup>3</sup>). [<sup>1</sup>H\_NMR\_400 MHz\_(CDCl<sub>3</sub>: 7.26 ppm)]**

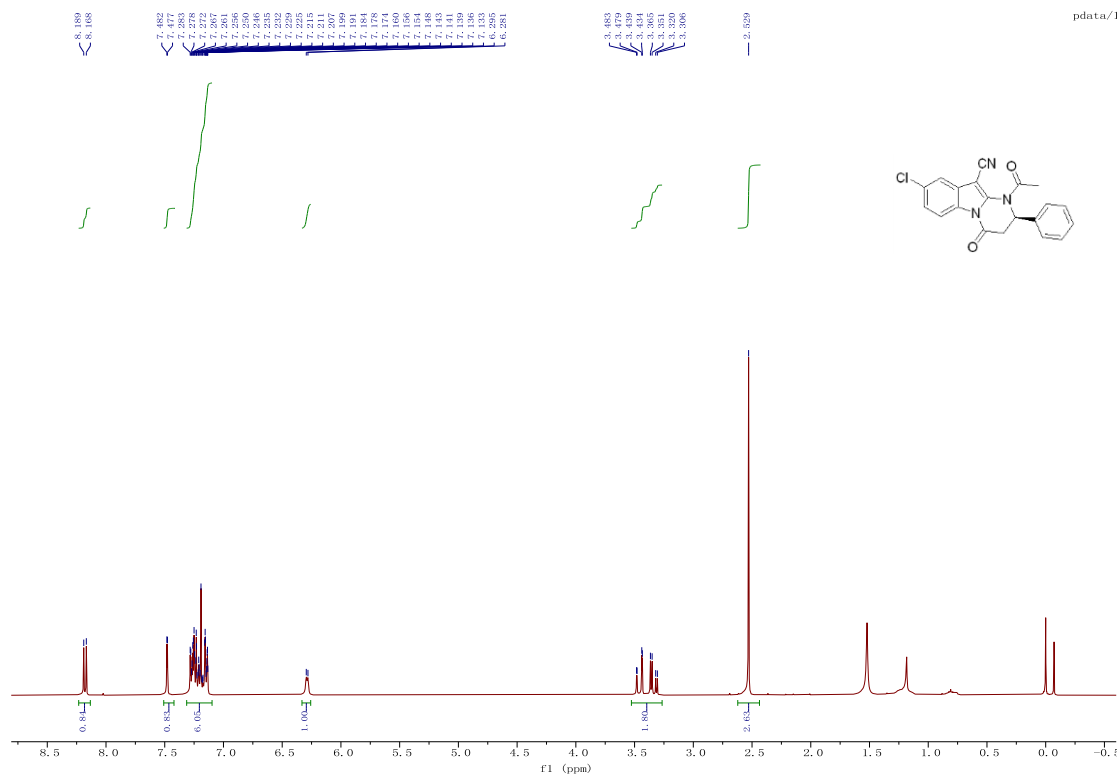

**[<sup>13</sup>C\_NMR\_151 MHz\_(CDCl<sub>3</sub>: 77.00 ppm)]**

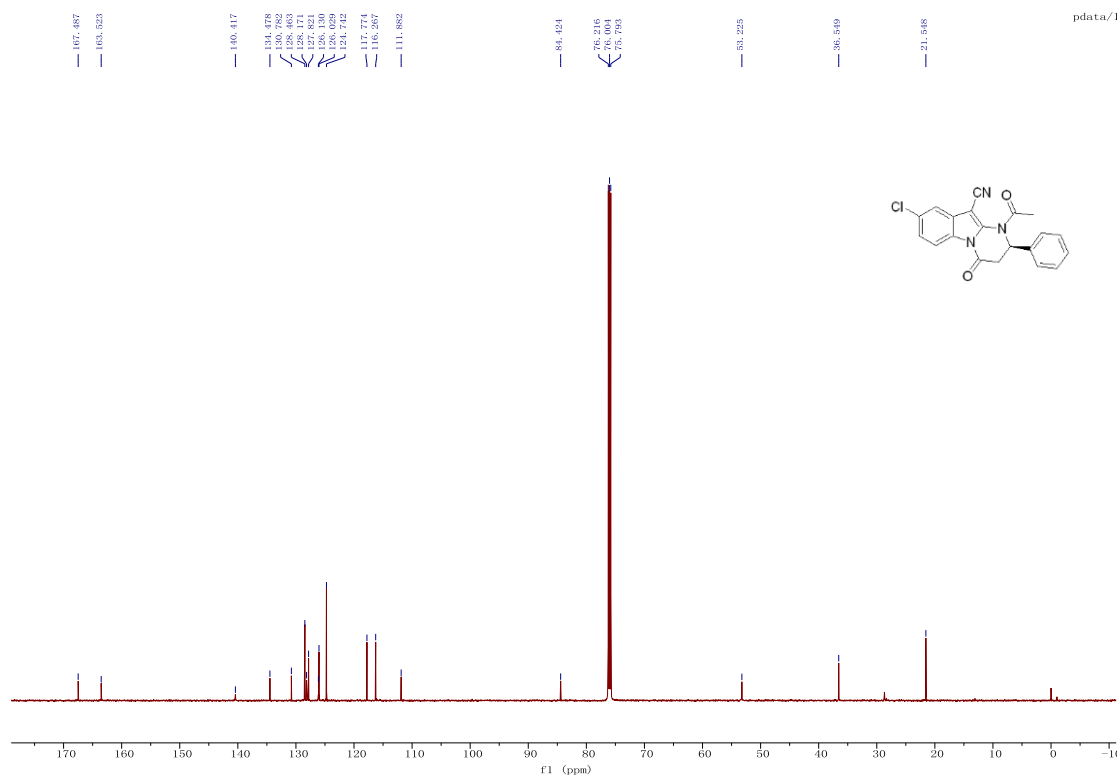

**(R)-8-Methyl-4-oxo-2-phenyl-1,2,3,4-tetrahydropyrimido[1,2-a]indole-10-**







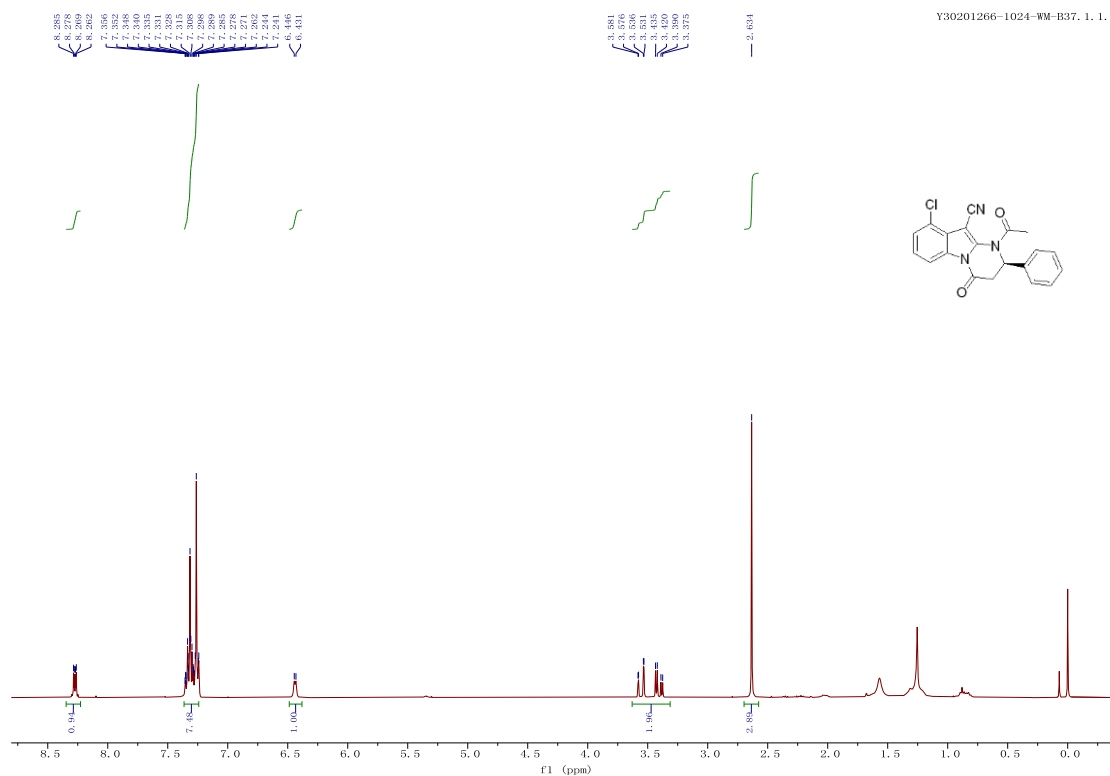

[<sup>13</sup>C NMR\_151 MHz\_(CDCl<sub>3</sub>: 77.00 ppm)]

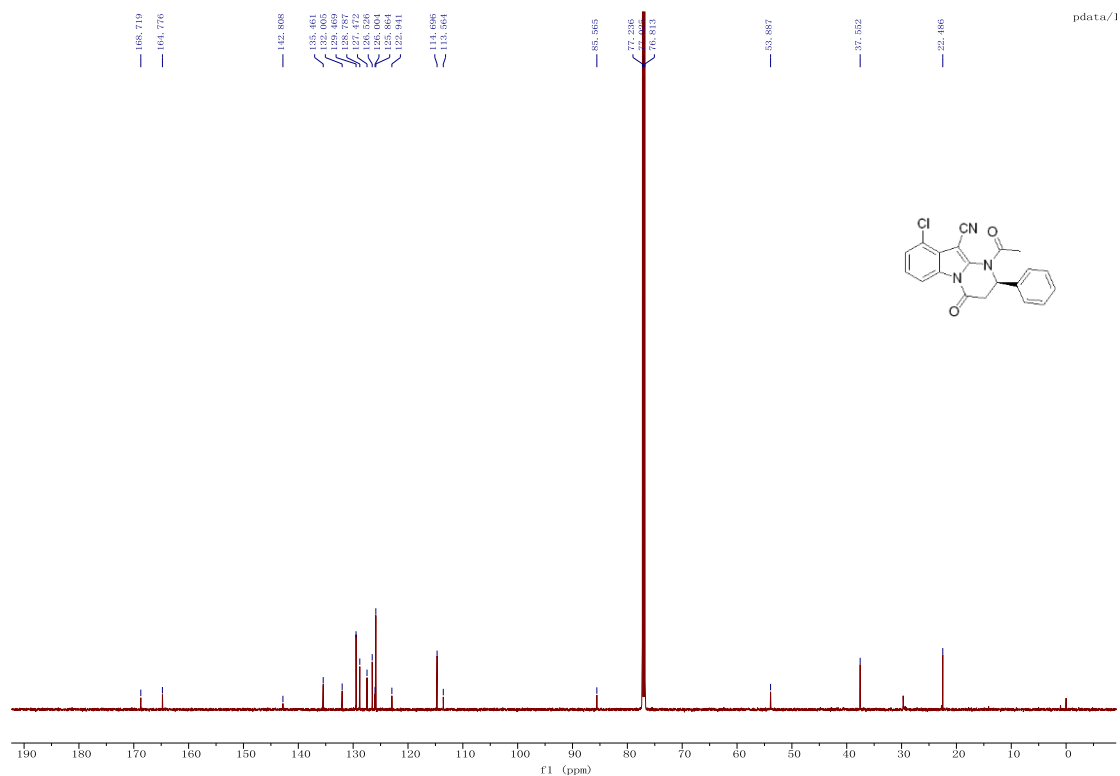

**(R)-9-Fluoro-4-oxo-2-phenyl-1,2,3,4-tetrahydropyrimido[1,2-a]indole-10-carbonitrile (3k).** [<sup>1</sup>H\_NMR\_400 MHz\_( DMSO-d<sub>6</sub>: 3.36, 2.50 ppm)]

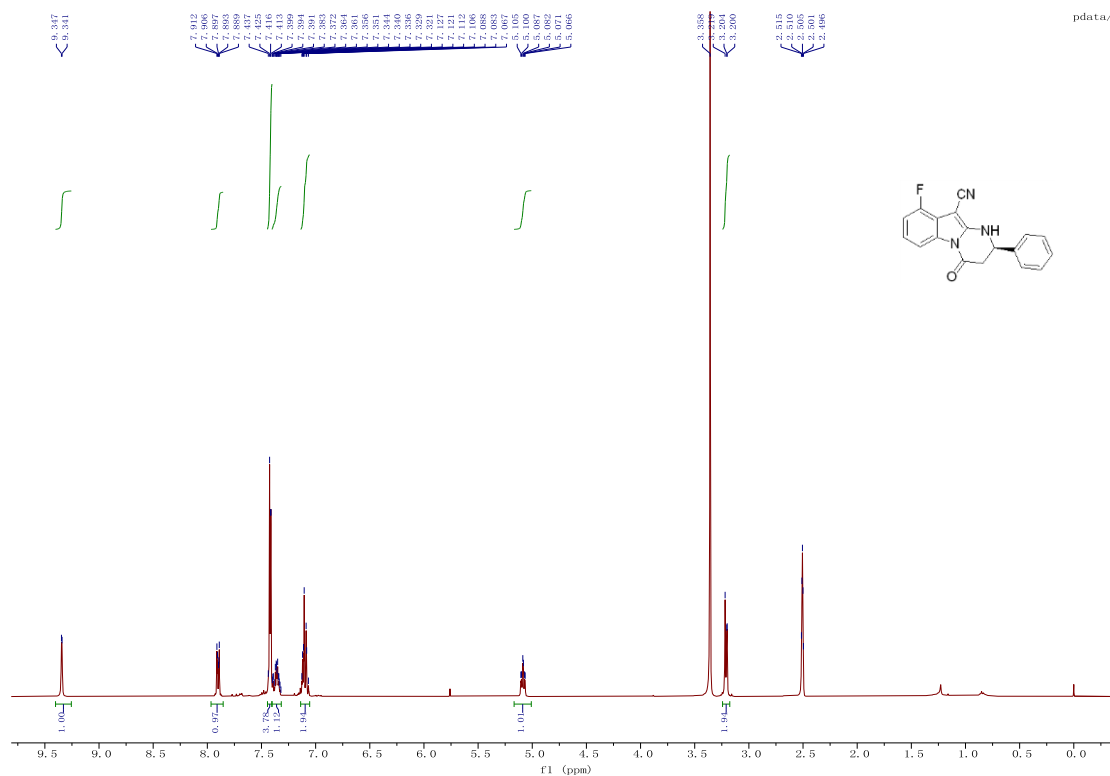

[<sup>13</sup>C\_NMR\_151 MHz\_(DMSO-d<sub>6</sub>: 39.5 ppm)]

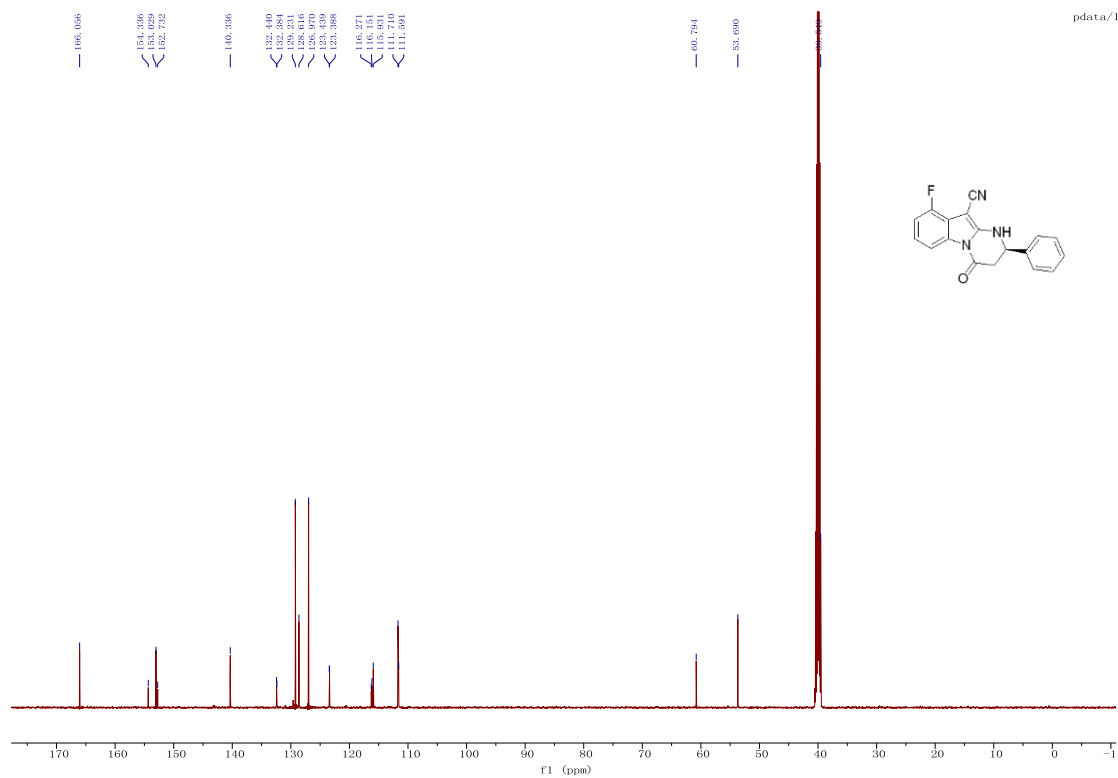

[<sup>19</sup>F\_NMR\_565 MHz]

127.495  
127.496  
127.412  
127.422

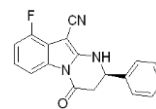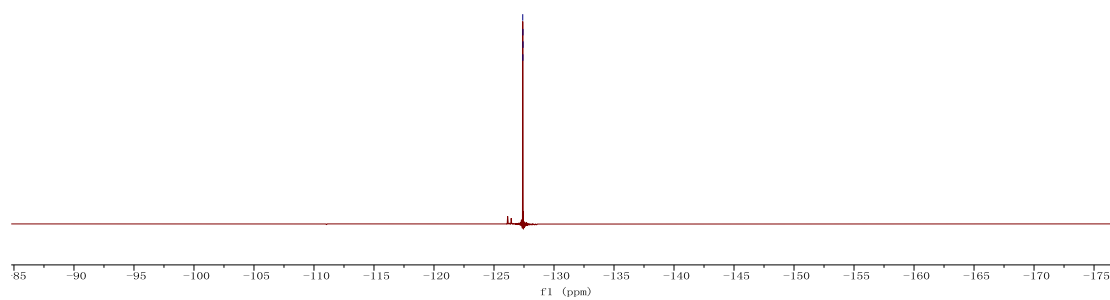

**(R)-1-Acetyl-9-methyl-4-oxo-2-phenyl-1,2,3,4-tetrahydropyrimido[1,2-a]indole-10-carbonitrile (3l').** [<sup>1</sup>H\_NMR\_400 MHz\_(CDCl<sub>3</sub>: 7.26 ppm)]

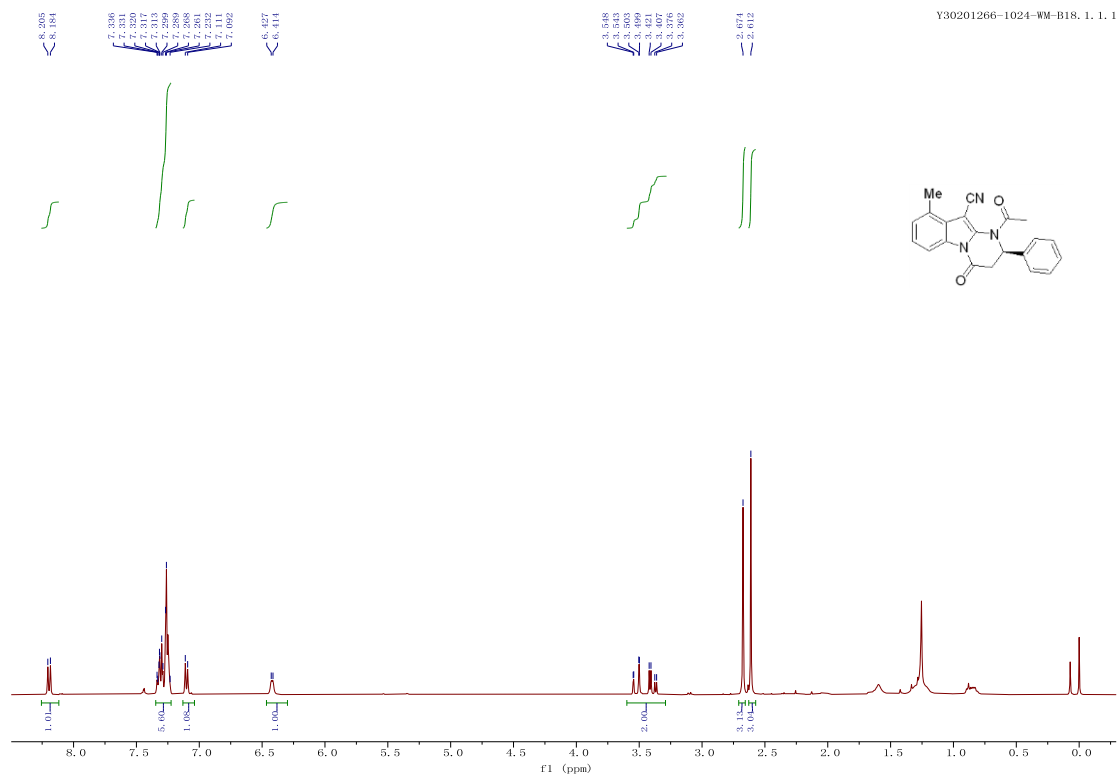

**[<sup>13</sup>C\_NMR\_151 MHz\_(CDCl<sub>3</sub>: 77.00 ppm)]**

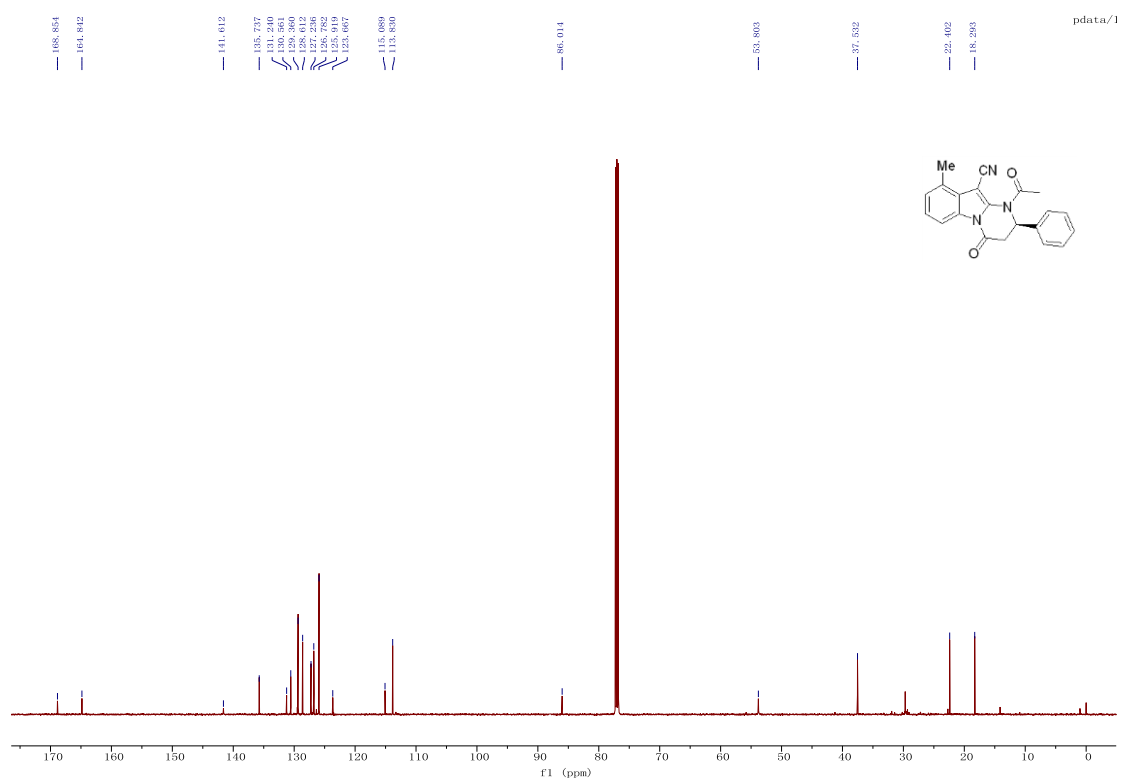

**(R)-2-(4-Bromophenyl)-4-oxo-1,2,3,4-tetrahydropyrimido[1,2-a]indole-10-**

**carbonitrile (3m).** [ $^1\text{H\_NMR\_600 MHz\_}(\text{DMSO-}d_6: 3.36, 2.50 \text{ ppm})]$

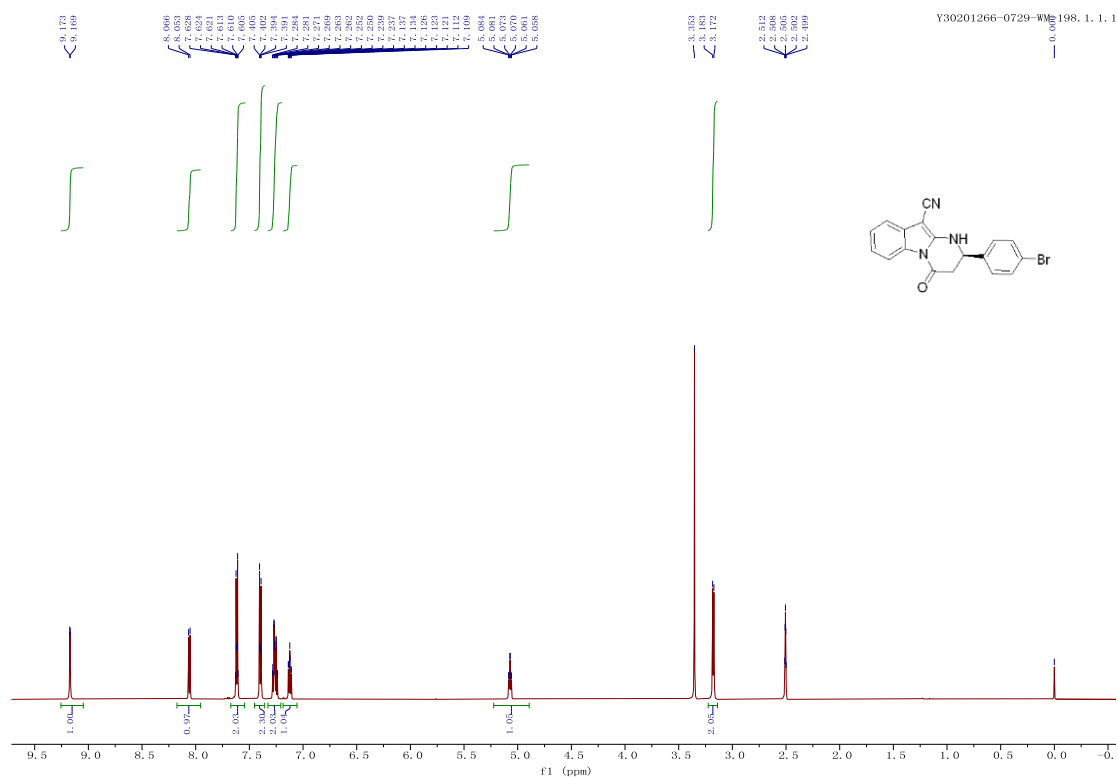

**[ $^{13}\text{C\_NMR\_151 MHz\_}(\text{DMSO-}d_6: 39.5 \text{ ppm})]$**

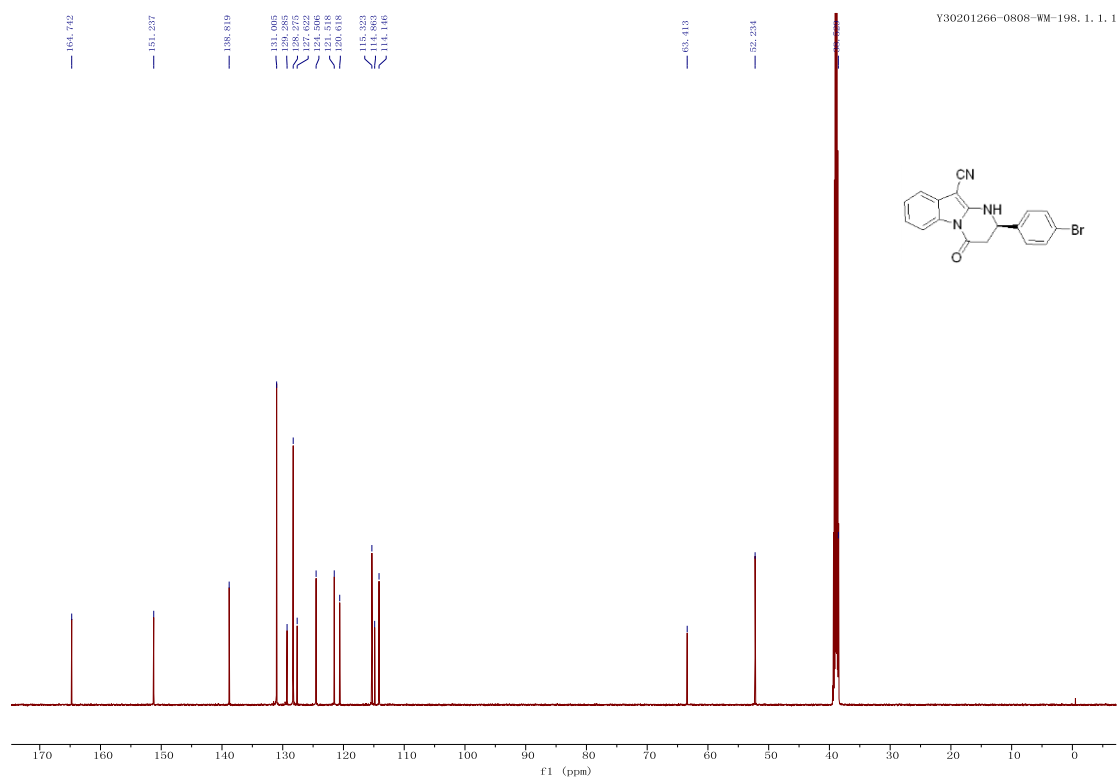

**(R)-2-(4-Chlorophenyl)-4-oxo-1,2,3,4-tetrahydropyrimido[1,2-a]indole-10-carbonitrile (3n).** [ $^1\text{H\_NMR\_400 MHz\_}(\text{DMSO-}d_6: 3.36, 2.50 \text{ ppm})]$

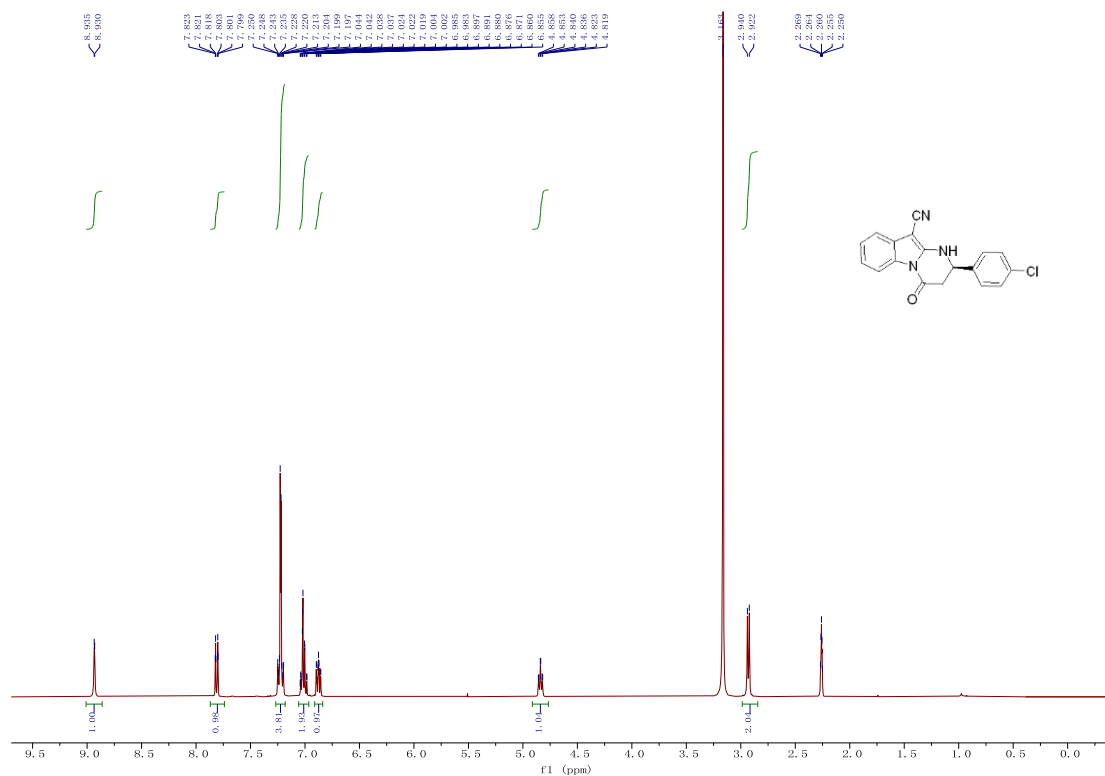

[<sup>13</sup>C\_NMR\_151 MHz\_(DMSO-*d*<sub>6</sub>: 39.5 ppm)]

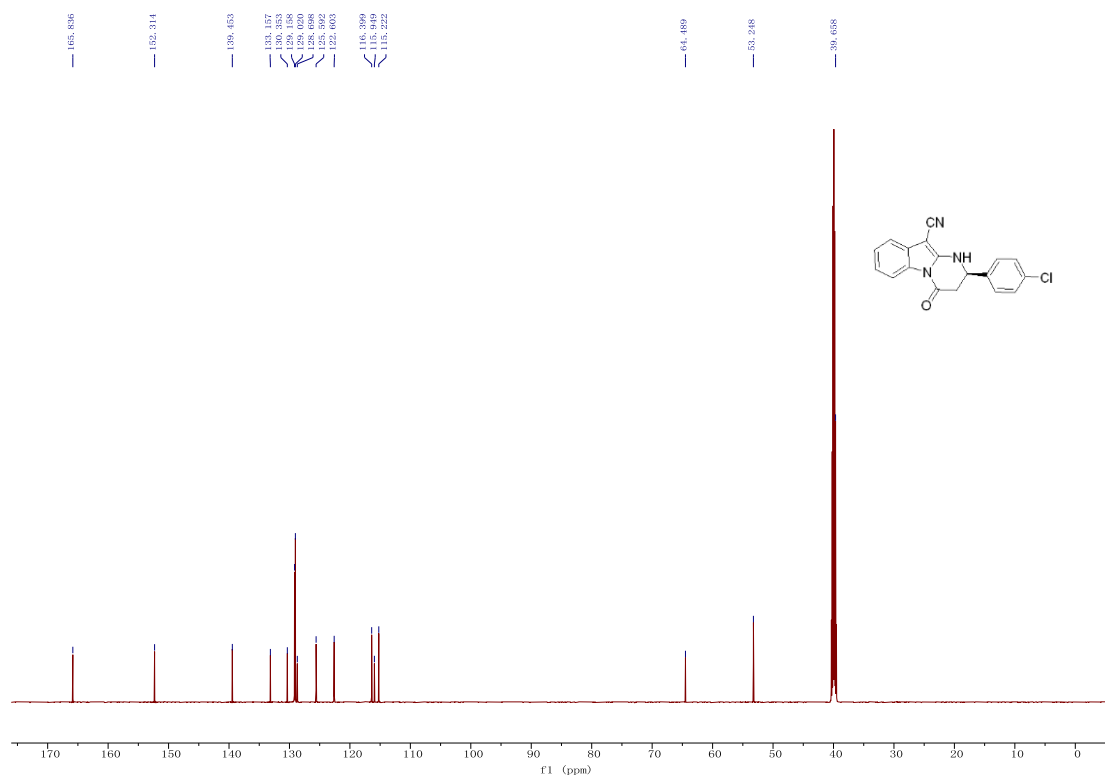

**(R)-2-(4-Fluorophenyl)-4-oxo-1,2,3,4-tetrahydropyrimido[1,2-a]indole-10-carbonitrile (30).** [<sup>1</sup>H\_NMR\_600 MHz\_(DMSO-*d*<sub>6</sub>: 3.36, 2.50 ppm)]



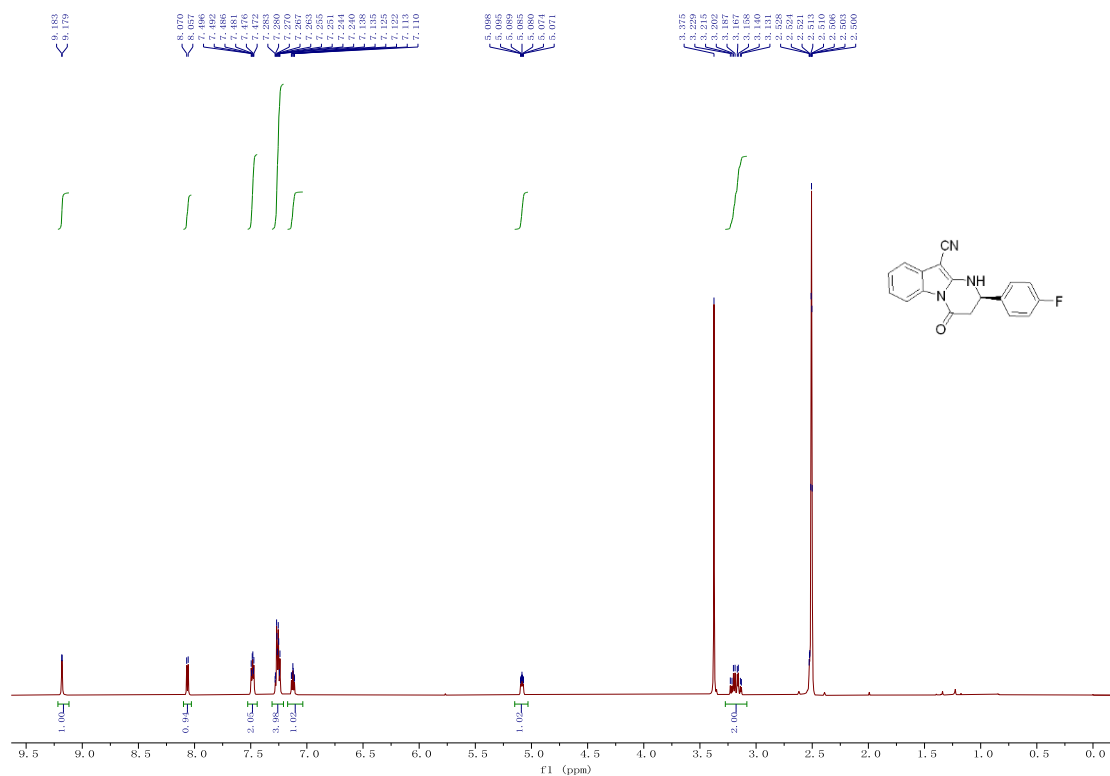

[<sup>13</sup>C\_NMR\_151 MHz\_(DMSO-*d*<sub>6</sub>: 39.5 ppm)]

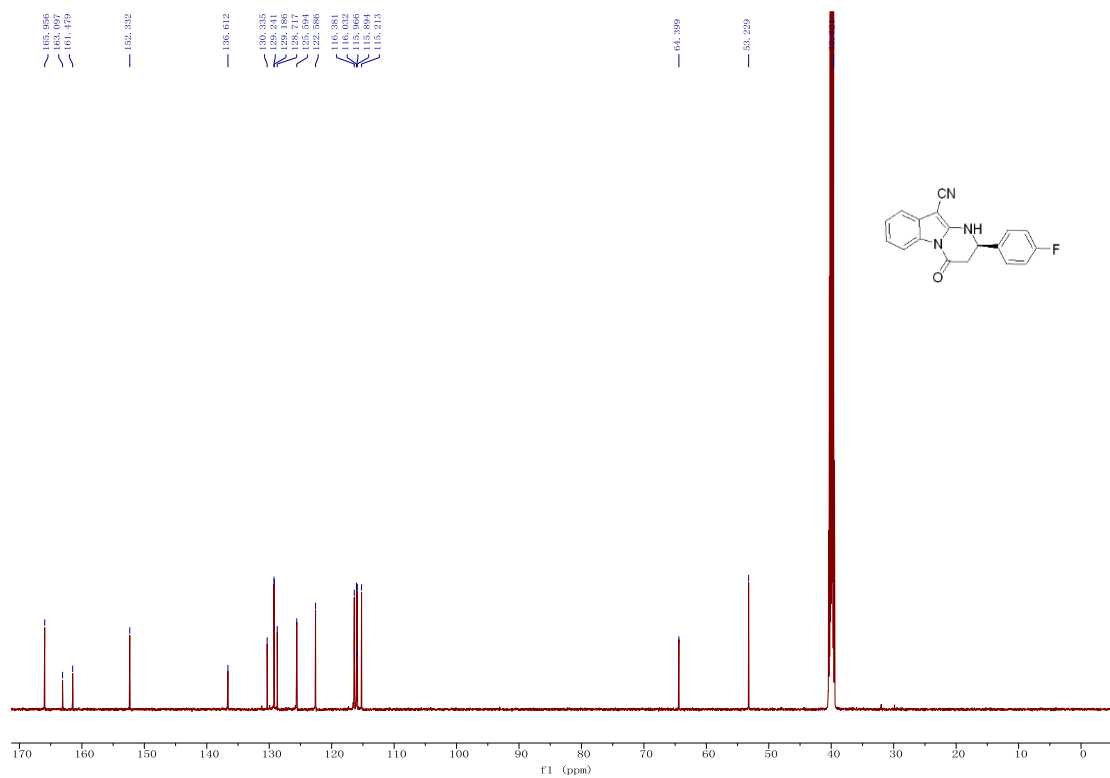

[<sup>19</sup>F\_NMR\_565 MHz]

114.205  
114.215  
114.225  
114.235  
114.244

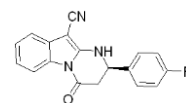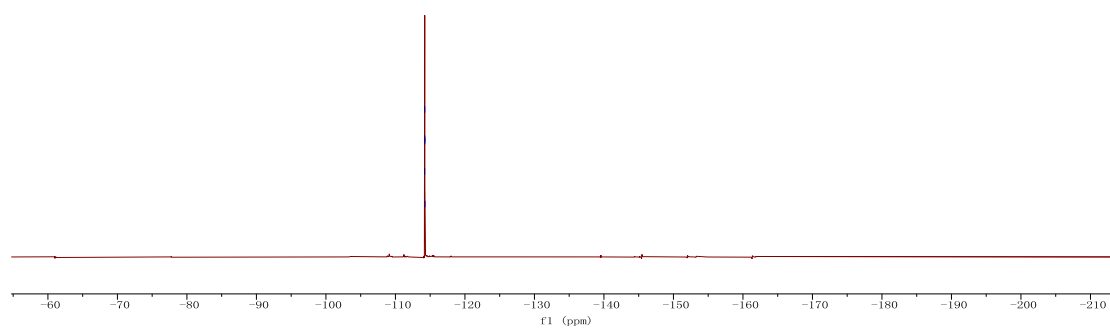

**(R)-4-Oxo-2-(4-(trifluoromethyl)phenyl)-1,2,3,4-tetrahydropyrimido[1,2-a]indole-10-carbonitrile (3p).** [<sup>1</sup>H\_NMR\_400 MHz\_(DMSO-d<sub>6</sub>: 3.36, 2.50 ppm)]

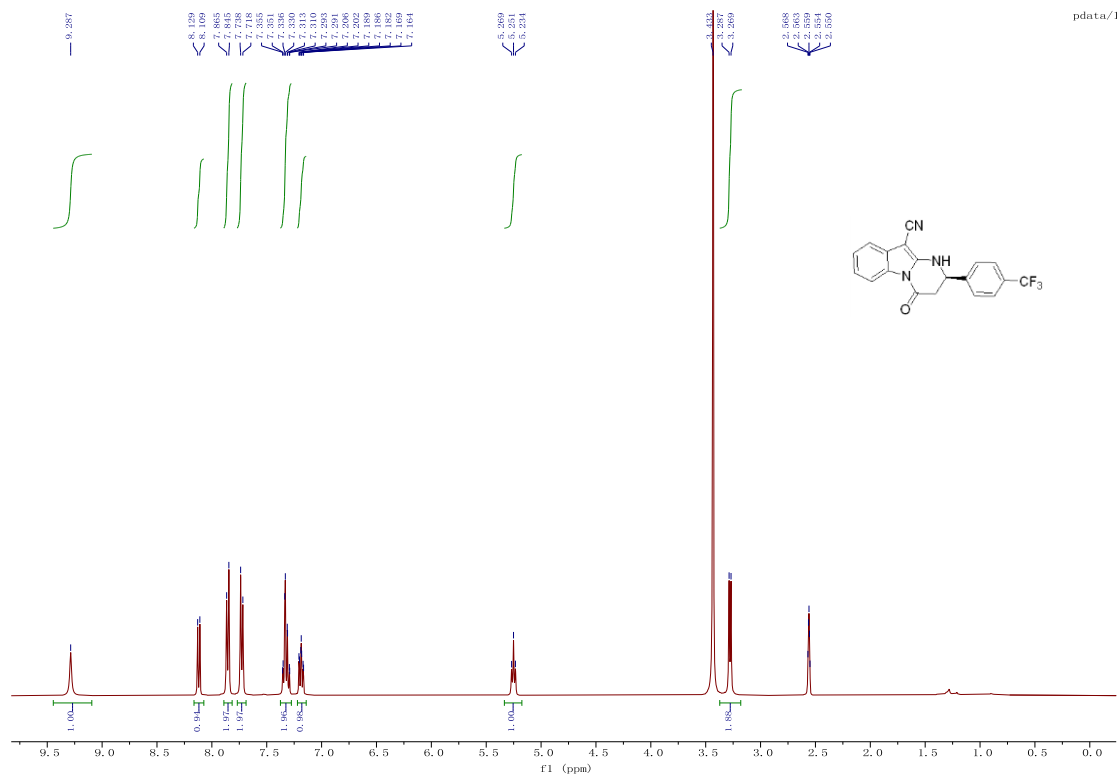

[<sup>13</sup>C\_NMR\_151 MHz\_(DMSO-d<sub>6</sub>: 39.5 ppm)]

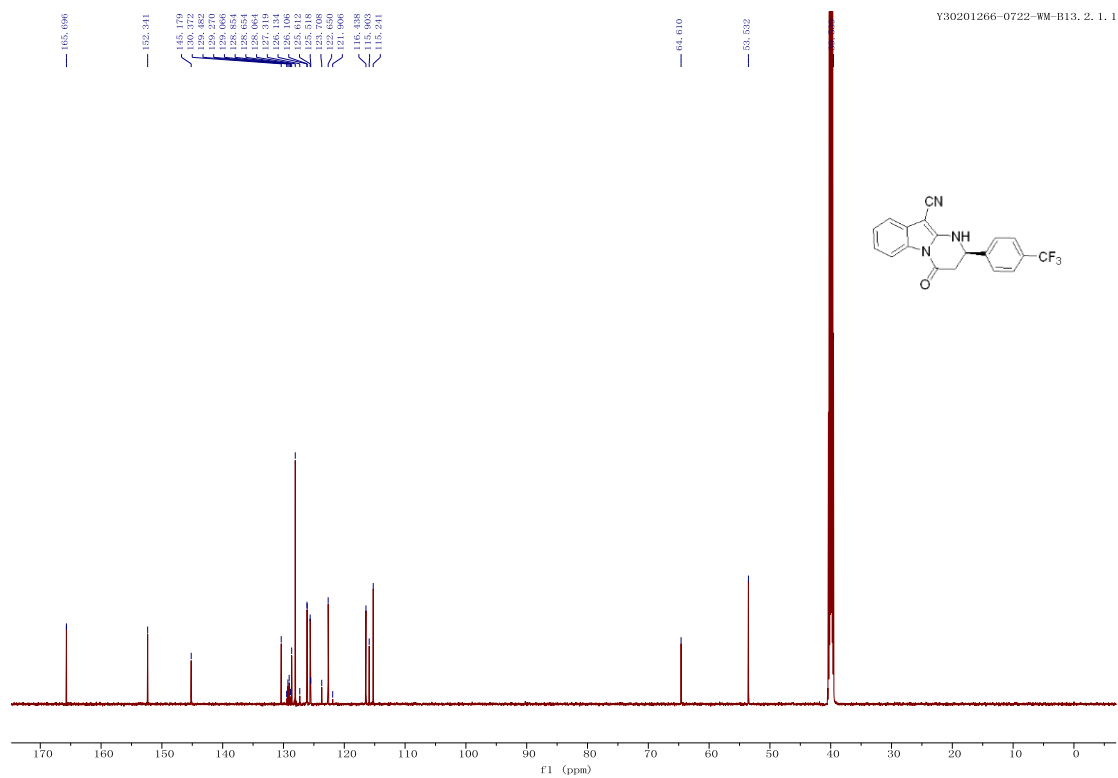

[<sup>19</sup>F\_NMR\_565 MHz]

100.999

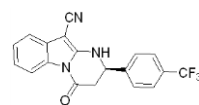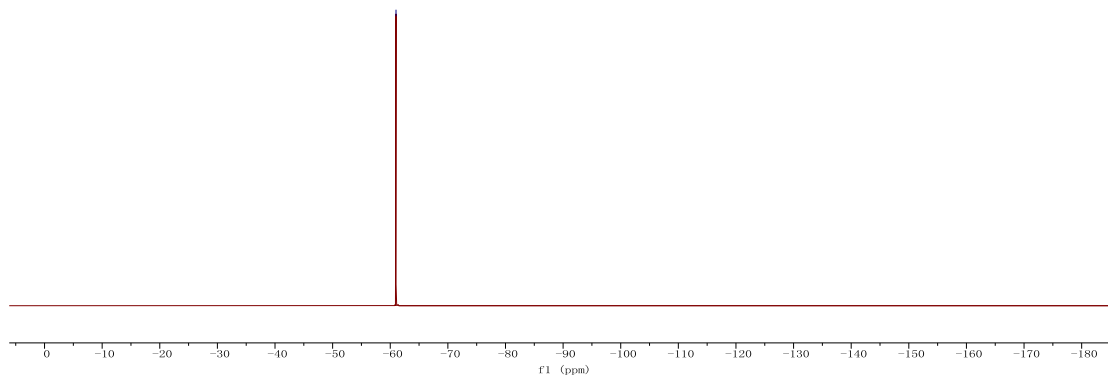

**(R)-4-Oxo-2-(p-tolyl)-1,2,3,4-tetrahydropyrimido[1,2-a]indole-10-carbonitrile**

**(3q).** [<sup>1</sup>H\_NMR\_400 MHz\_(DMSO-d<sub>6</sub>: 3.36, 2.50 ppm)]

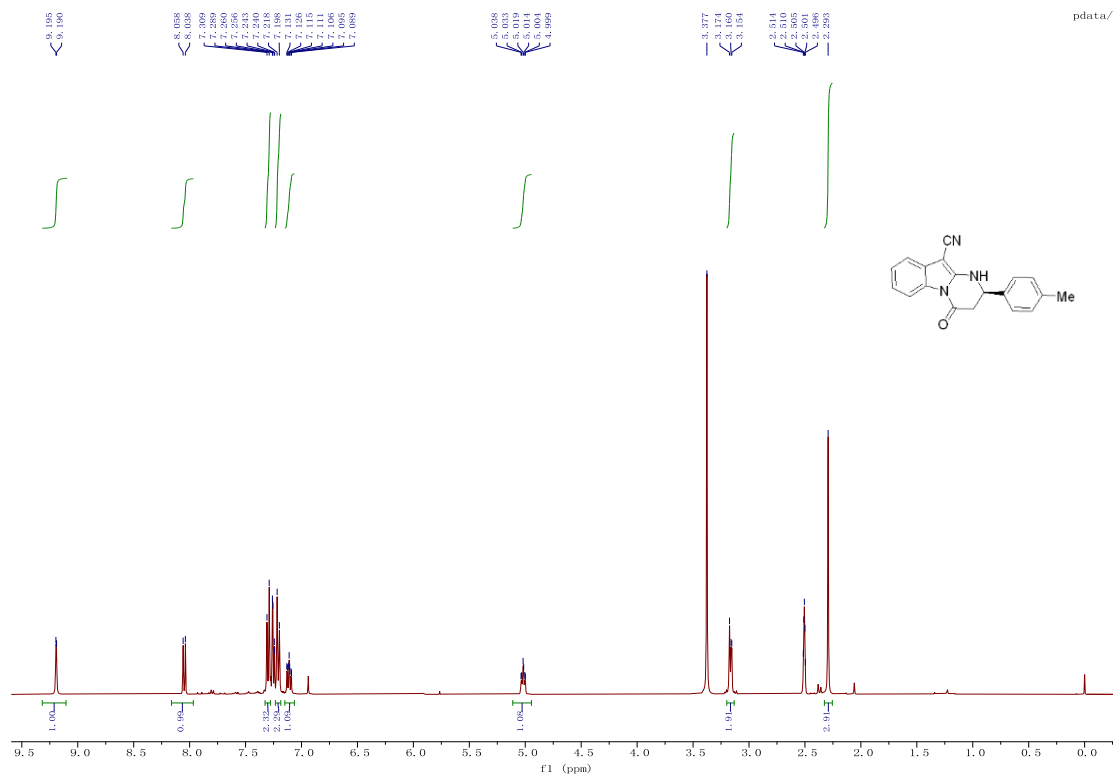

[<sup>13</sup>C\_NMR\_151 MHz\_(DMSO-d<sub>6</sub>: 39.5 ppm)]

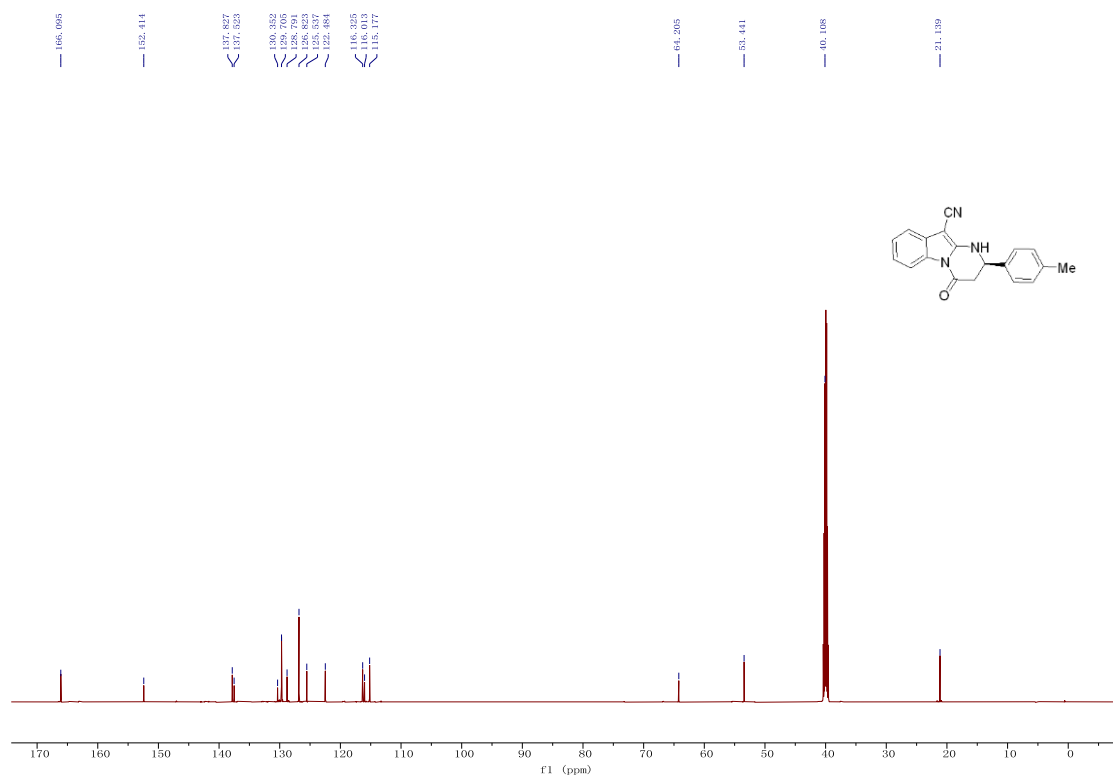

**(R)-2-(4-Methoxyphenyl)-4-oxo-1,2,3,4-tetrahydropyrimido[1,2-a]indole-10-**

**carbonitrile (3r).** [<sup>1</sup>H\_NMR\_400 MHz\_(DMSO-*d*<sub>6</sub>: 3.36, 2.50 ppm)]

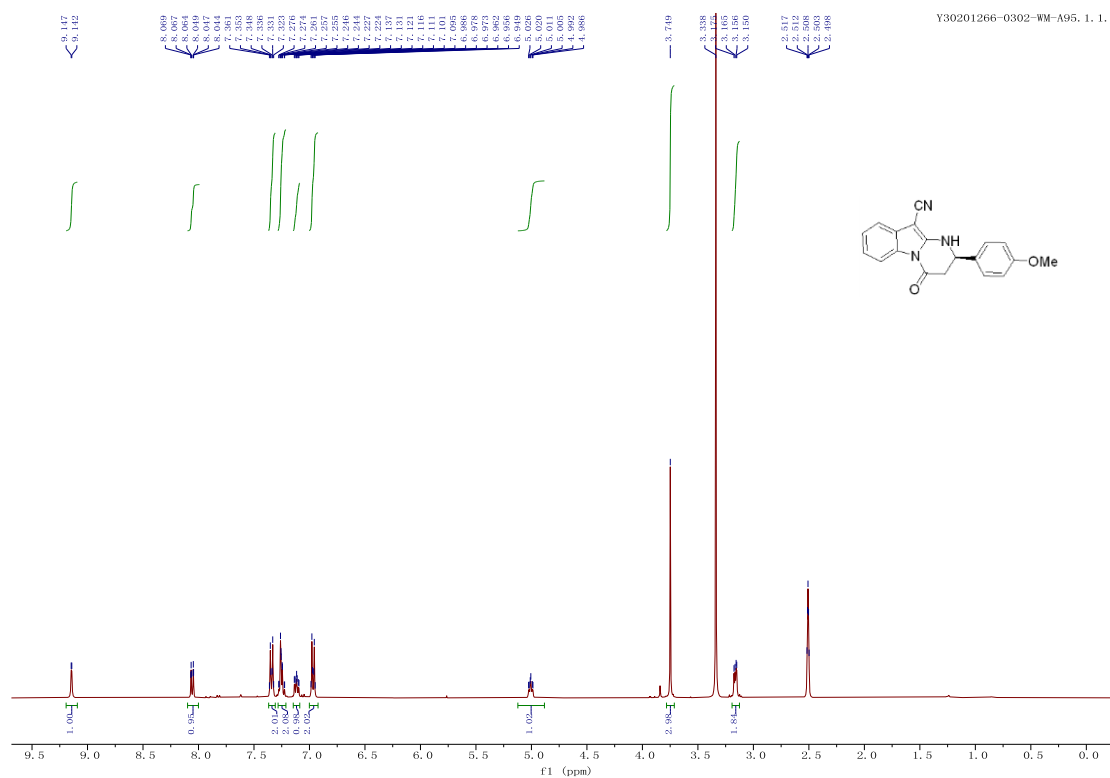

**[<sup>13</sup>C\_NMR\_151 MHz\_(DMSO-*d*<sub>6</sub>: 39.5 ppm)]**

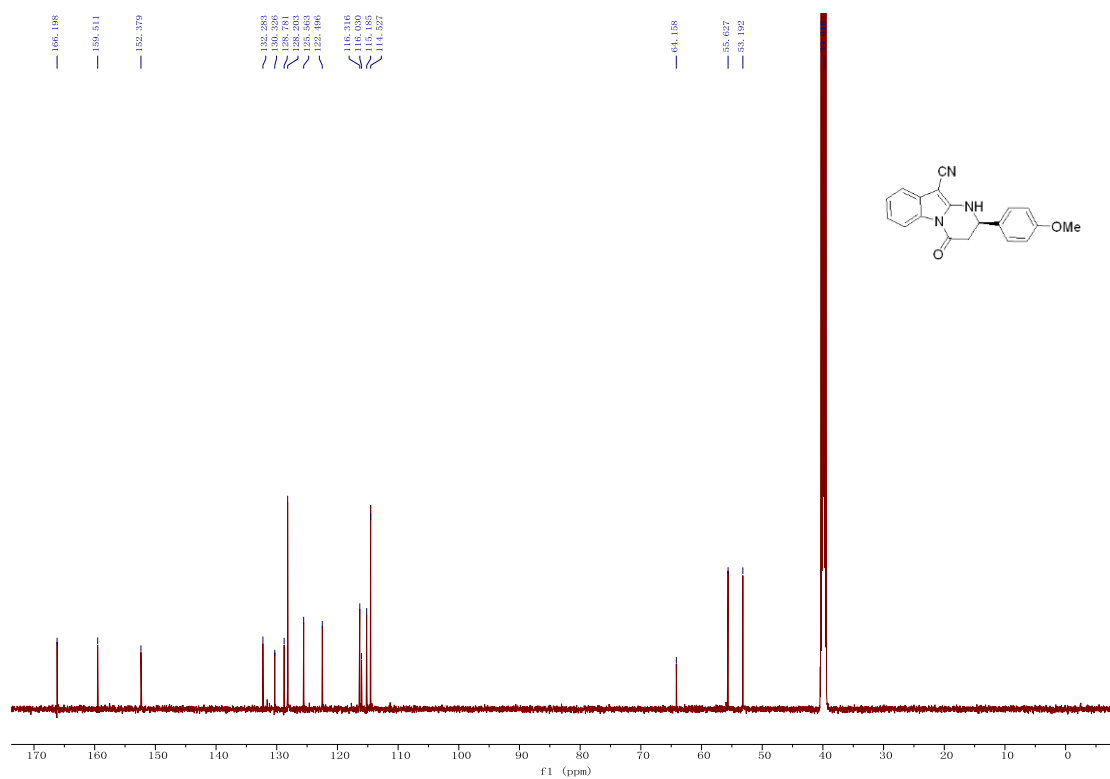

**(*R*)-2-(3-Bromophenyl)-4-oxo-1,2,3,4-tetrahydropyrimido[1,2-*a*]indole-10-carbonitrile (3s).** [<sup>1</sup>H\_NMR\_400 MHz\_(DMSO-*d*<sub>6</sub>: 3.36, 2.50 ppm)]

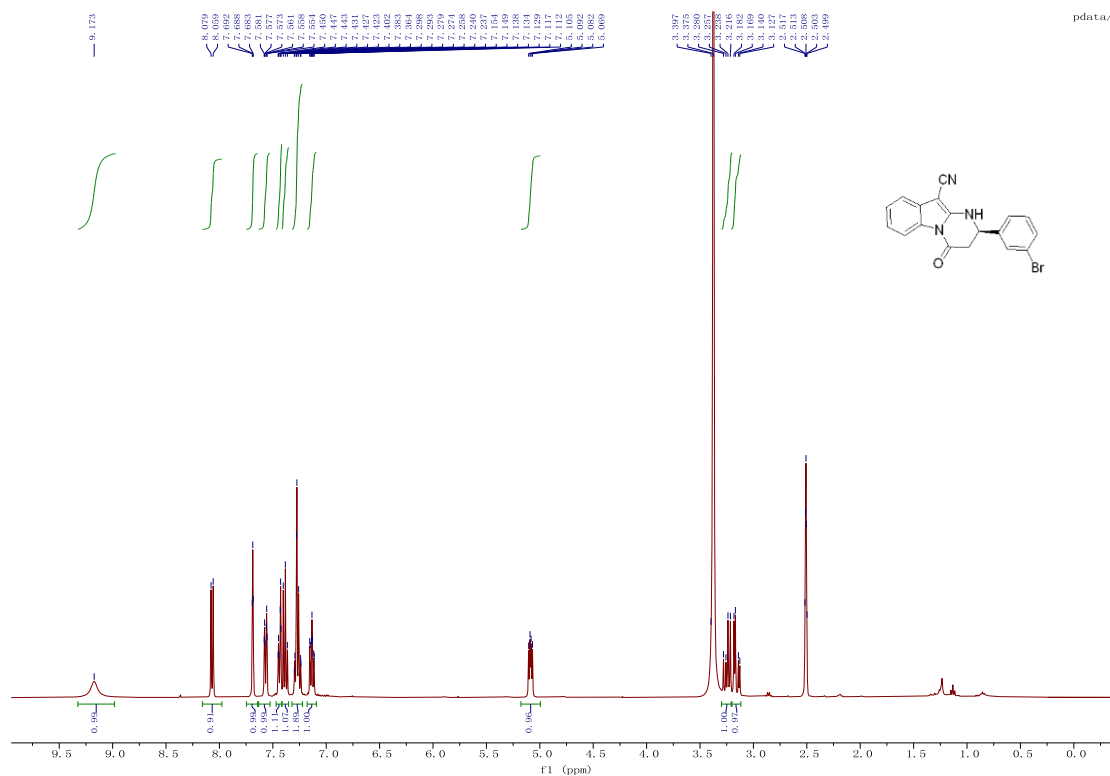

[<sup>13</sup>C\_NMR\_151 MHz\_( DMSO-*d*<sub>6</sub>: 39.5 ppm)]

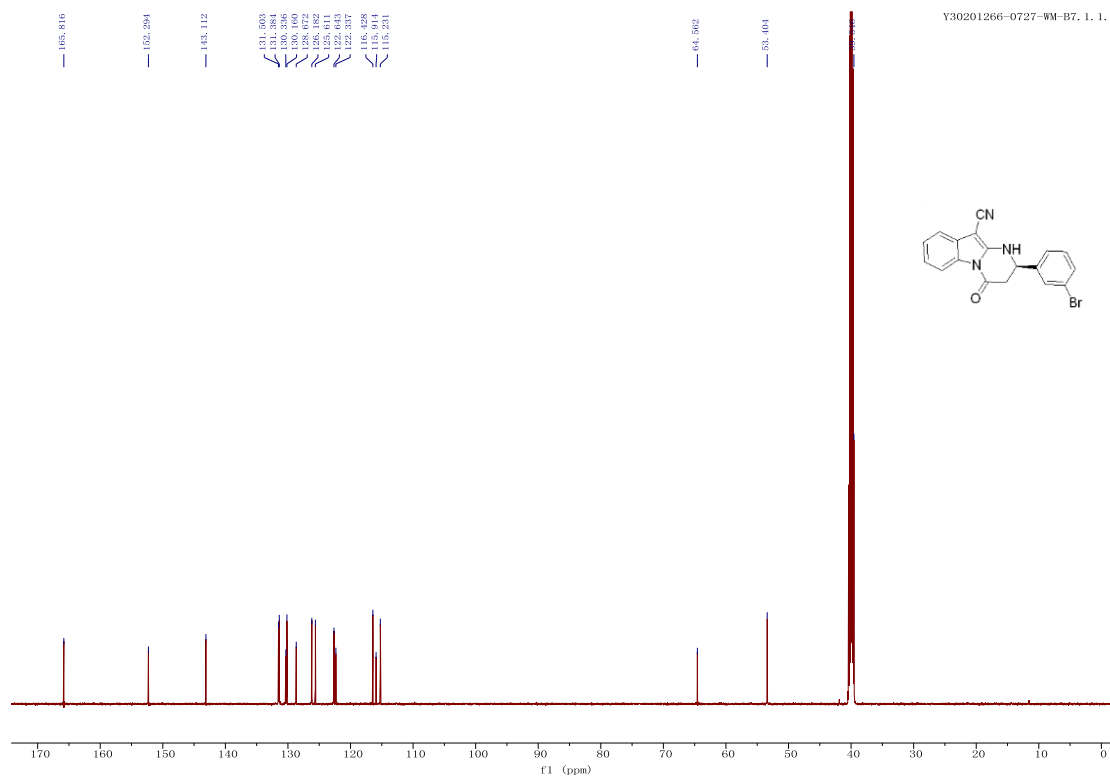

**(*R*)-2-(3-Chlorophenyl)-4-oxo-1,2,3,4-tetrahydropyrimido[1,2-*a*]indole-10-carbonitrile (3t).** [<sup>1</sup>H\_NMR\_400 MHz\_(DMSO-*d*<sub>6</sub>: 3.36, 2.50 ppm)]

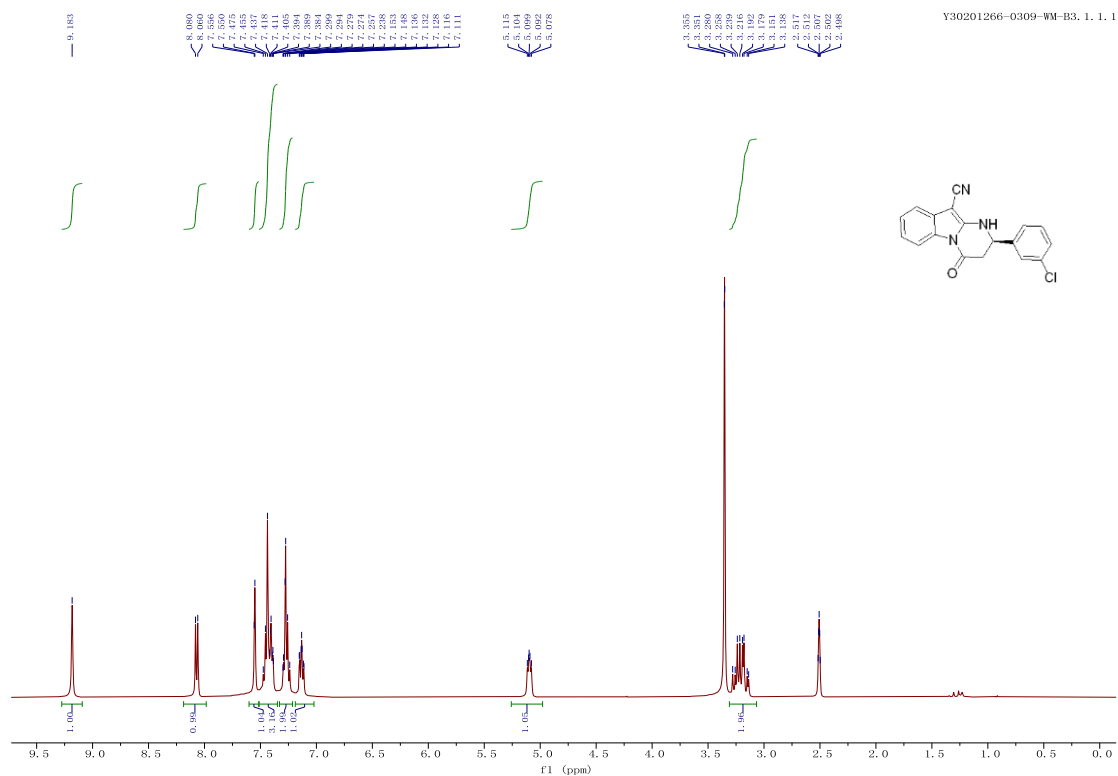

[<sup>13</sup>C\_NMR\_151 MHz\_(DMSO-*d*<sub>6</sub>: 39.5 ppm)]

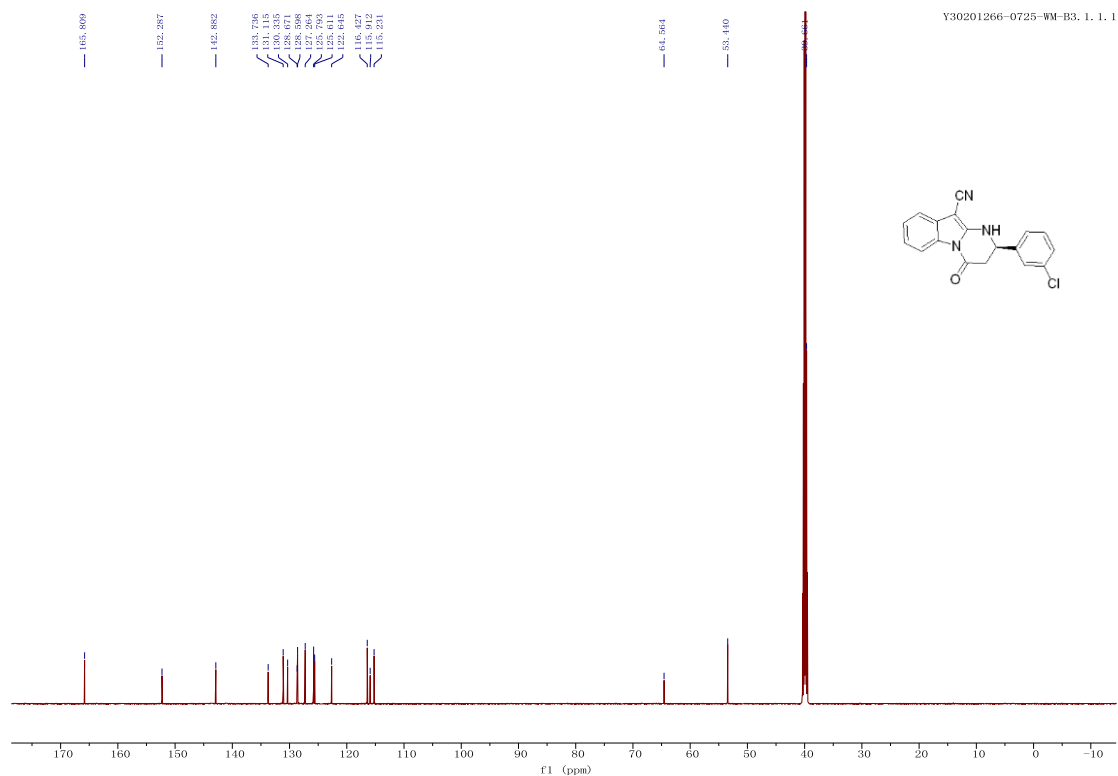

**(R)-2-(3-Fluorophenyl)-4-oxo-1,2,3,4-tetrahydropyrimido[1,2-a]indole-10-carbonitrile (3u).** [<sup>1</sup>H\_NMR\_400 MHz\_(DMSO-*d*<sub>6</sub>: 3.36, 2.50 ppm)]



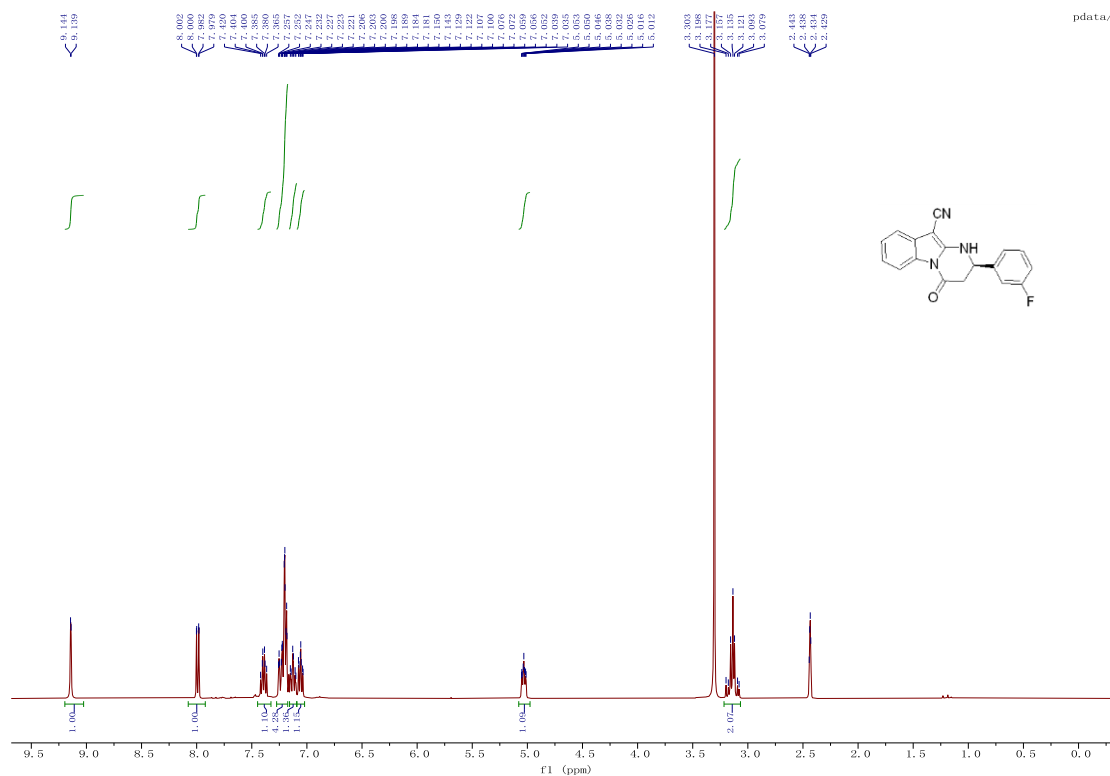

[<sup>13</sup>C\_NMR\_151 MHz\_(DMSO-d<sub>6</sub>: 39.5 ppm)]

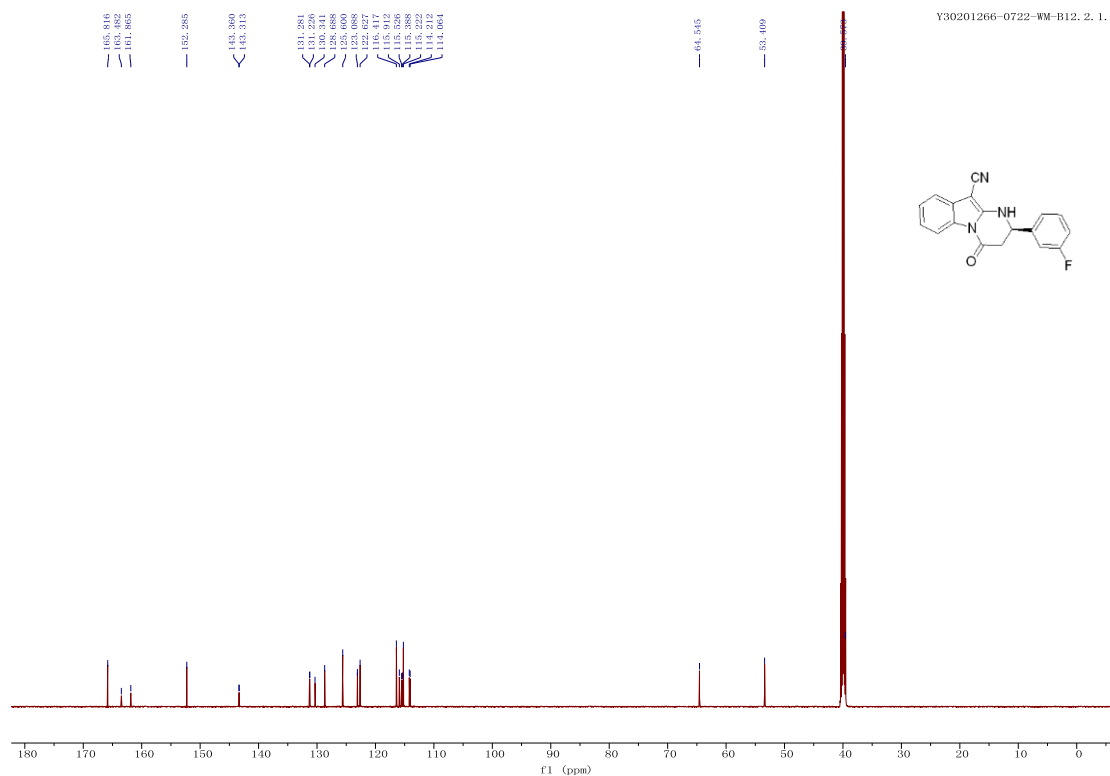

[<sup>19</sup>F\_NMR\_565 MHz]

112.463  
112.307  
112.538

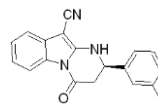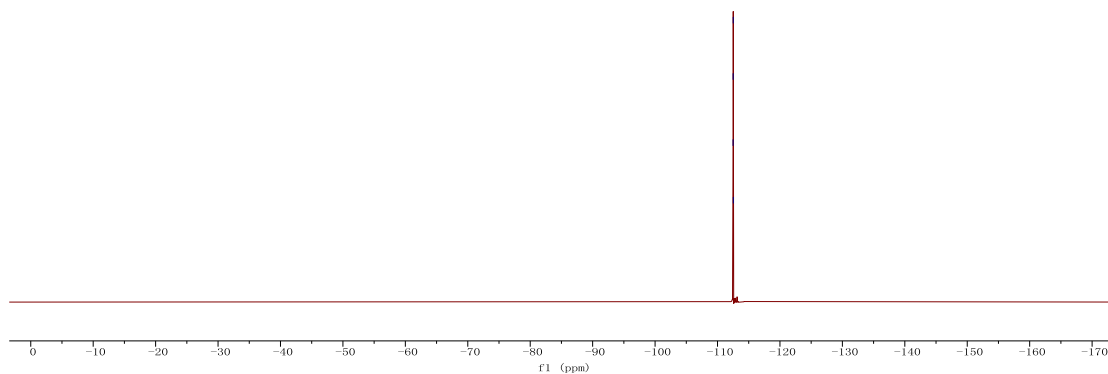

**(R)-4-Oxo-2-(3-(trifluoromethyl)phenyl)-1,2,3,4-tetrahydropyrimido[1,2-a]indole-10-carbonitrile (3v).** [<sup>1</sup>H\_NMR\_400 MHz\_(DMSO-d<sub>6</sub>: 3.36, 2.50 ppm)]

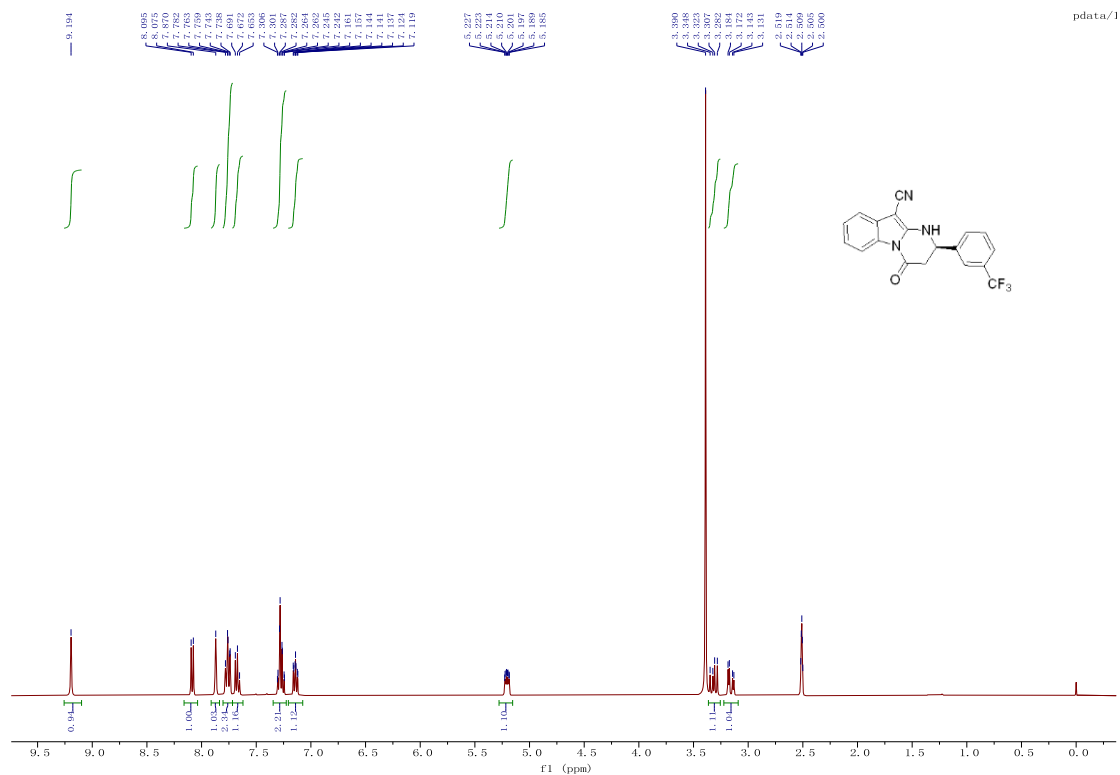

[<sup>13</sup>C\_NMR\_151 MHz\_(DMSO-d<sub>6</sub>: 39.5 ppm)]

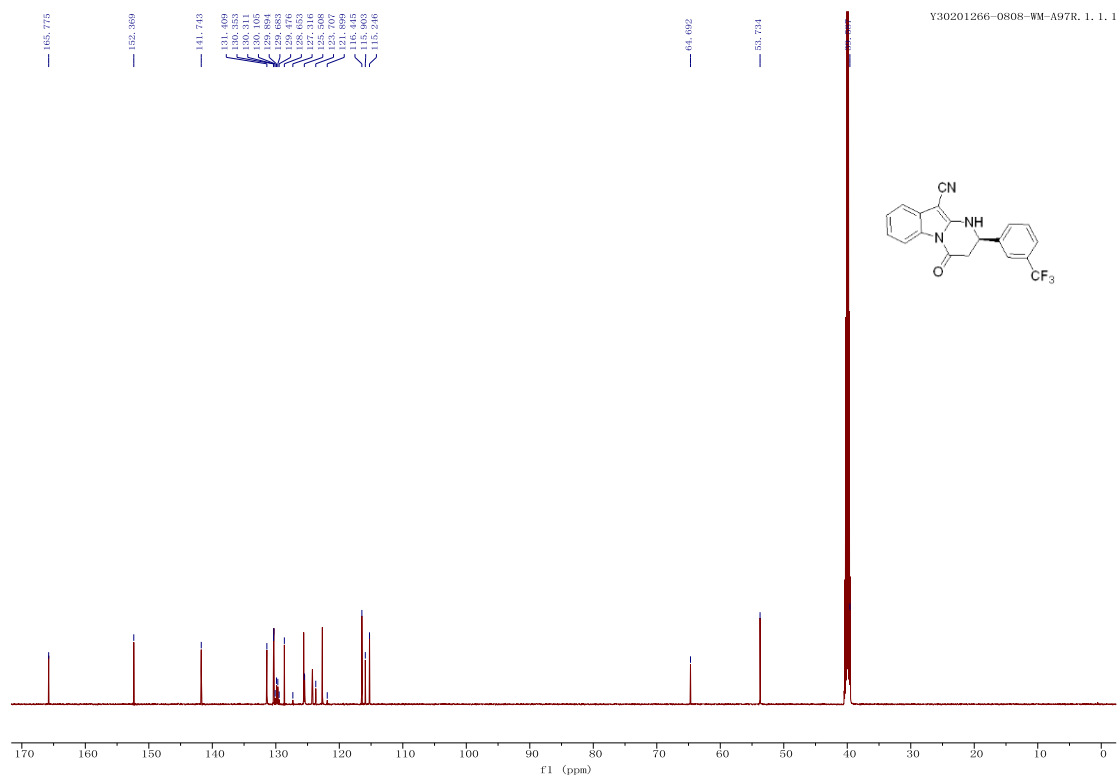

[<sup>19</sup>F\_NMR\_565 MHz]

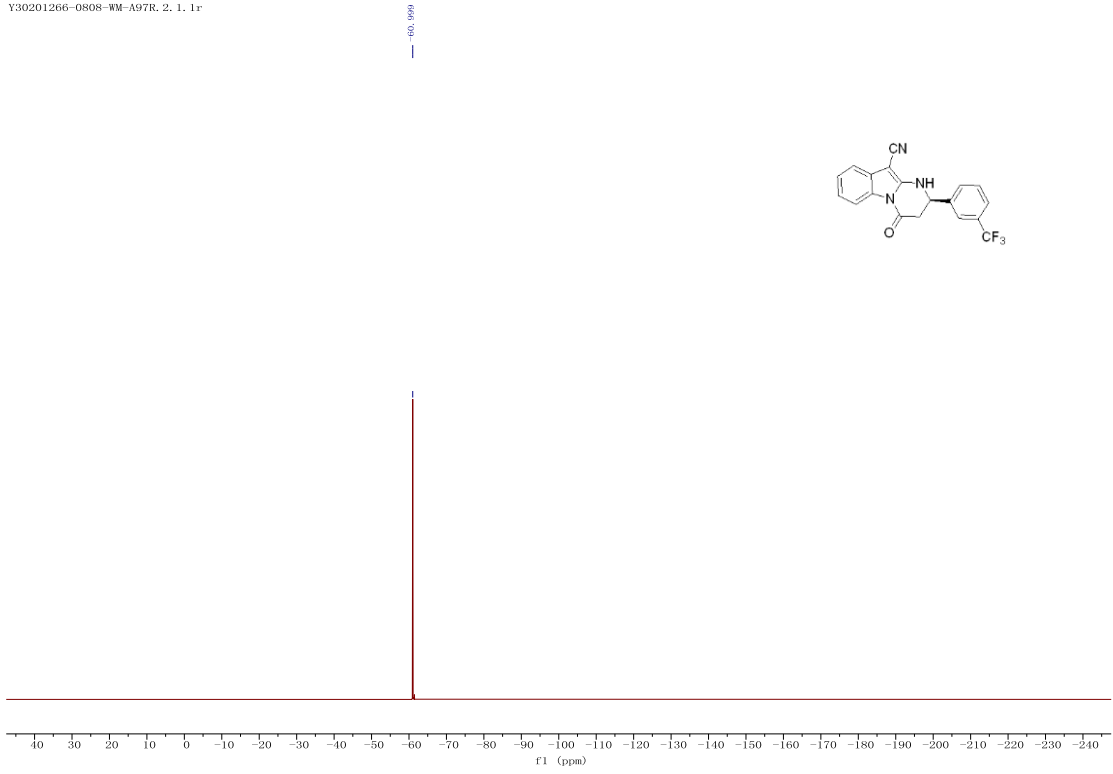

**(R)-4-Oxo-2-(m-tolyl)-1,2,3,4-tetrahydropyrimido[1,2-a]indole-10-carbonitrile**

**(3w).** [<sup>1</sup>H\_NMR\_400 MHz\_(DMSO-d<sub>6</sub>: 3.36, 2.50 ppm)]

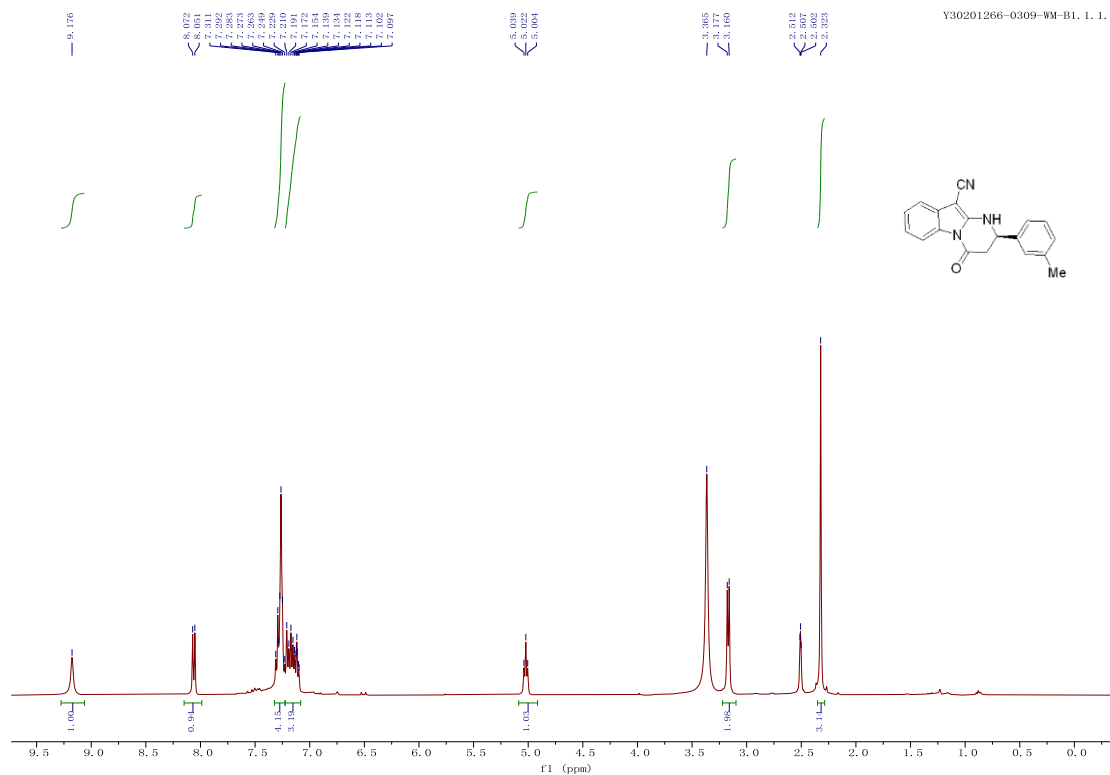

[<sup>13</sup>C\_NMR\_151 MHz\_( DMSO-d<sub>6</sub>: 39.5 ppm)]

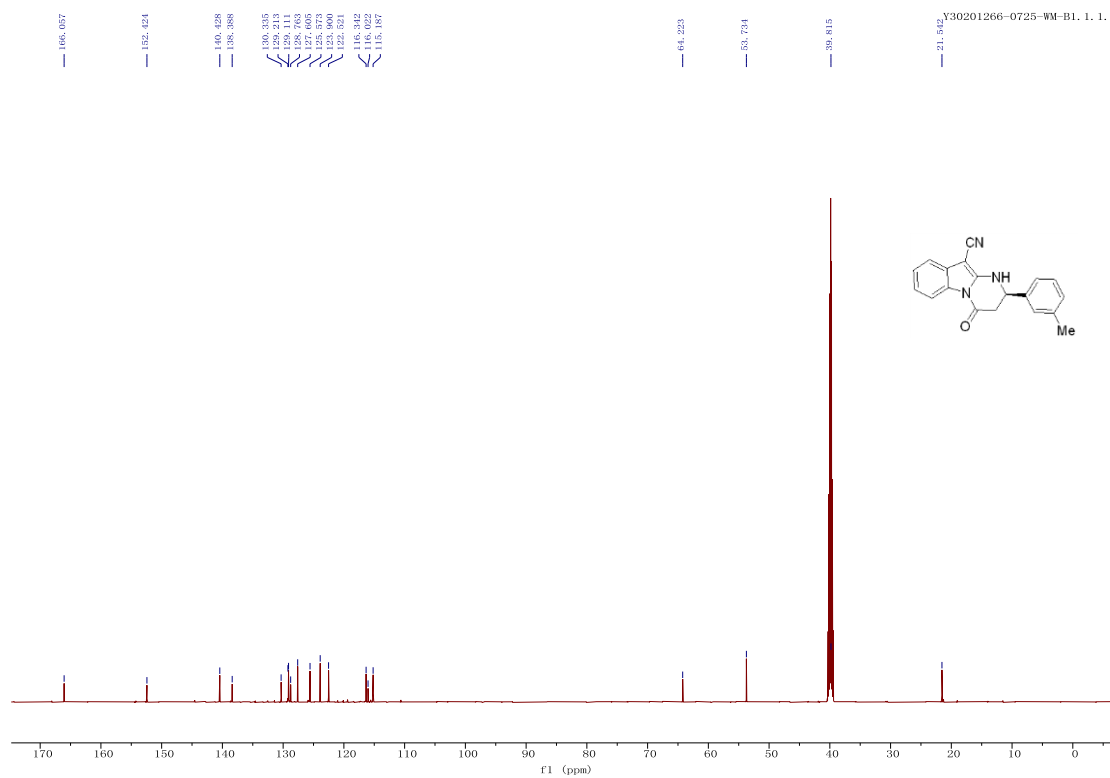

**(R)-4-Oxo-2-phenyl-1,2,3,4-tetrahydropyrimido[1,2-a]indole-10-carboxamide**

(4a). [<sup>1</sup>H\_NMR\_400 MHz\_(DMSO-d<sub>6</sub>: 3.36, 2.50 ppm)]

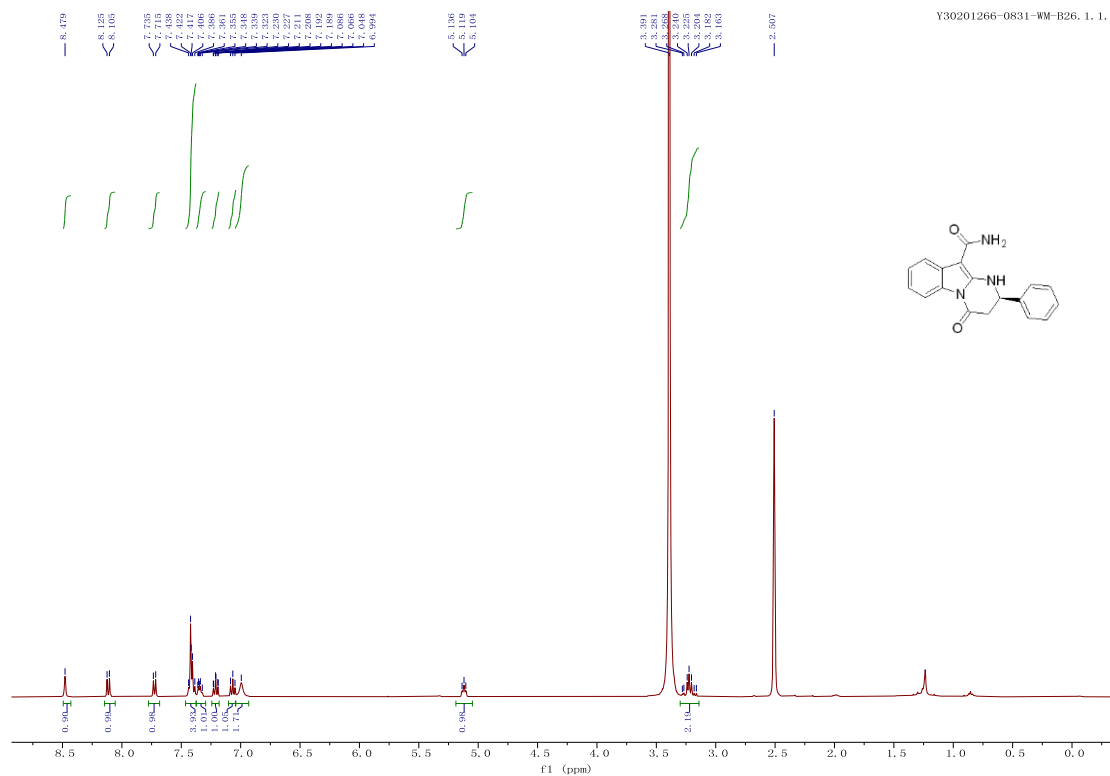

<sup>13</sup>C NMR (151 MHz, DMSO-d<sub>6</sub>) spectrum of compound 4a

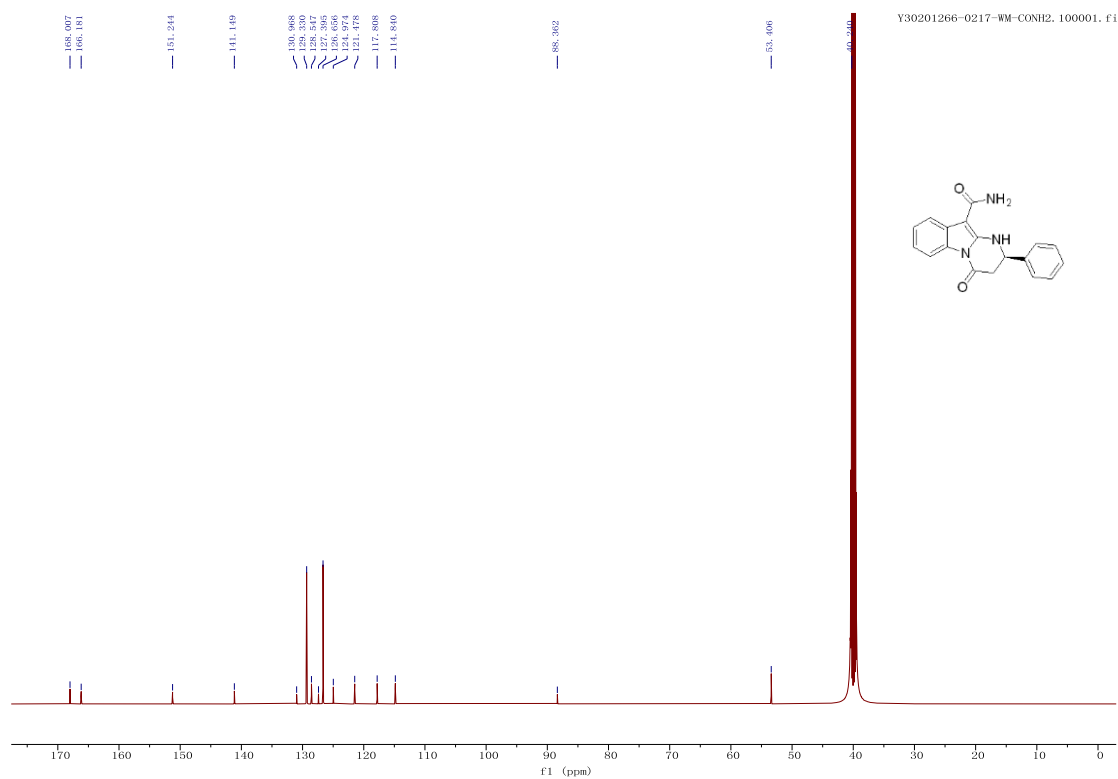

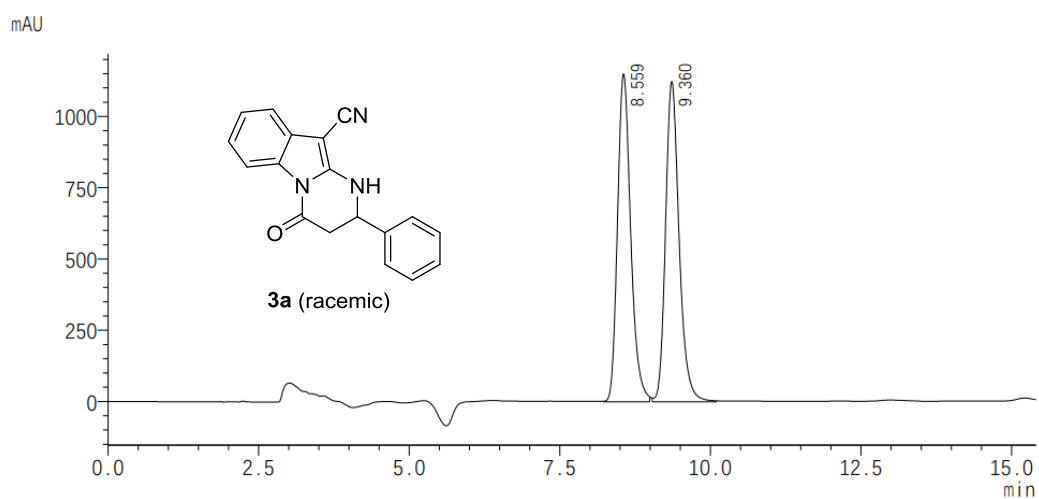

PDA Ch1 254nm

| Peak# | Ret. Time [min] | Area [mAU*s] | Height [mAU] | Area % | Hight % |
|-------|-----------------|--------------|--------------|--------|---------|
| 1     | 8.559           | 17472800     | 1149727      | 49.691 | 50.591  |
| 2     | 9.360           | 17689787     | 1122865      | 50.309 | 49.409  |

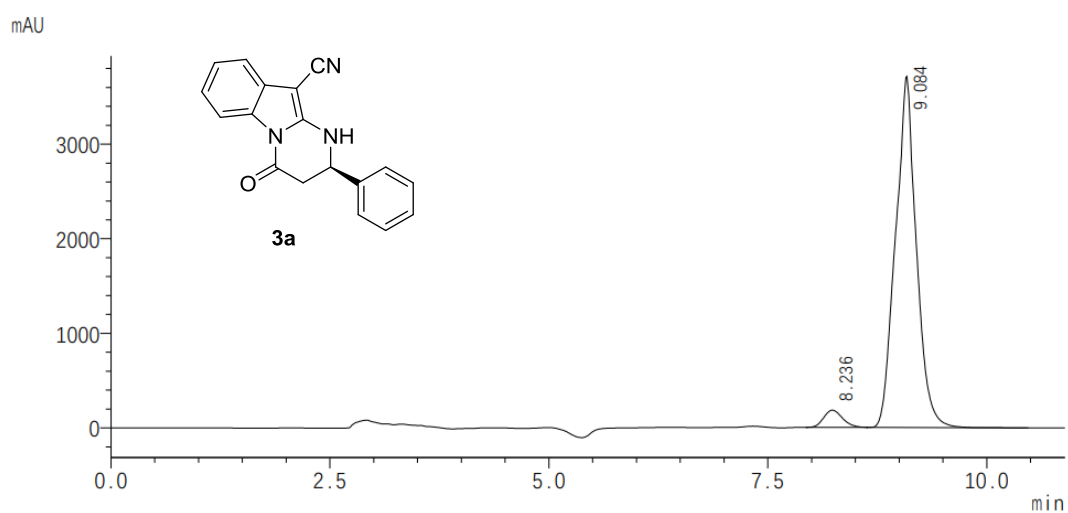

PDA Ch1 254nm

| Peak# | Ret. Time [min] | Area [mAU*s] | Height [mAU] | Area % | Hight % |
|-------|-----------------|--------------|--------------|--------|---------|
| 1     | 8.236           | 2695564      | 181755       | 4.205  | 4.669   |
| 2     | 9.084           | 61414595     | 3711178      | 95.795 | 95.331  |

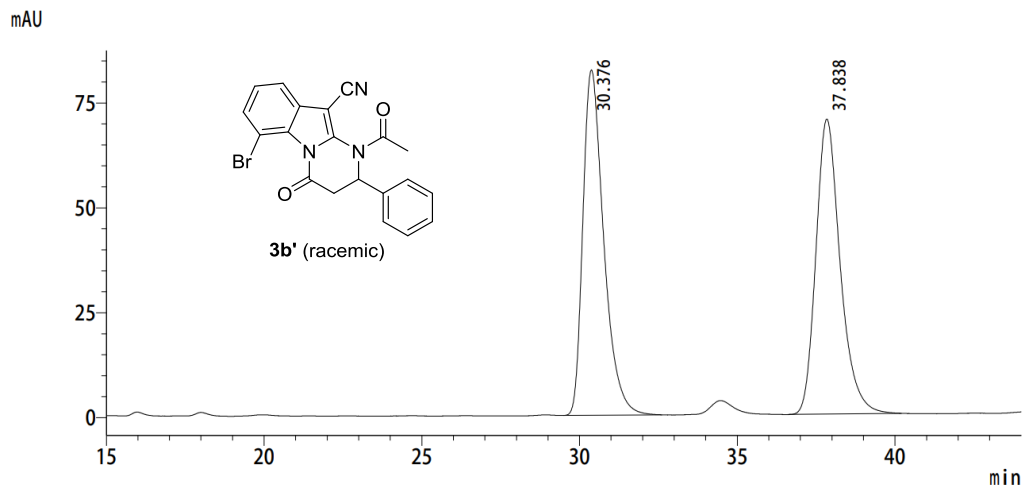

PDA Ch1 254nm

| Peak# | Ret. Time [min] | Area [mAU*s] | Hight [mAU] | Area % | Hight % |
|-------|-----------------|--------------|-------------|--------|---------|
| 1     | 30.376          | 3778053      | 82289       | 50.070 | 53.926  |
| 2     | 37.838          | 3767500      | 70308       | 49.930 | 46.074  |

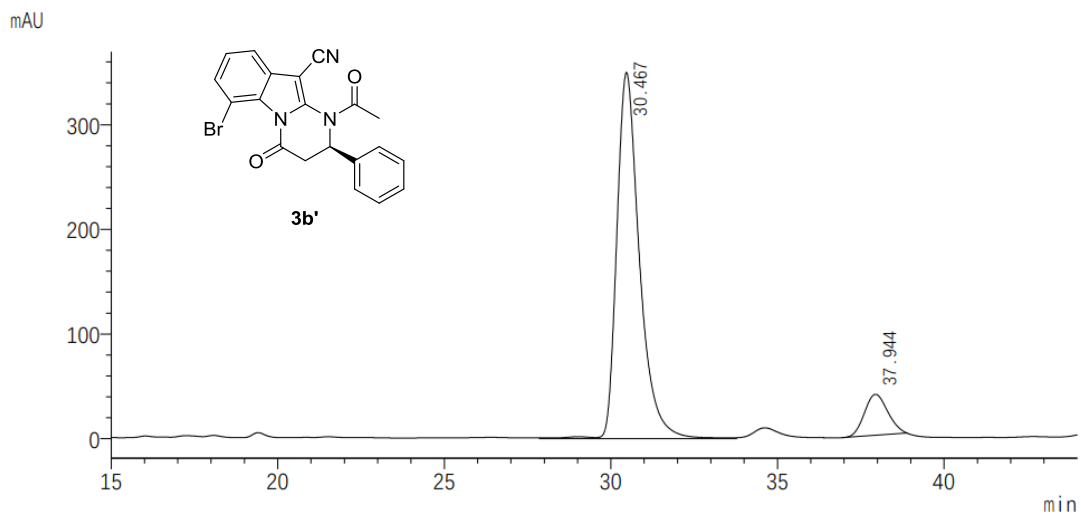

PDA Ch1 254nm

| Peak# | Ret. Time [min] | Area [mAU*s] | Hight [mAU] | Area % | Hight % |
|-------|-----------------|--------------|-------------|--------|---------|
| 1     | 30.467          | 16558116     | 349838      | 89.729 | 89.945  |
| 2     | 37.944          | 1895257      | 39110       | 10.271 | 10.055  |



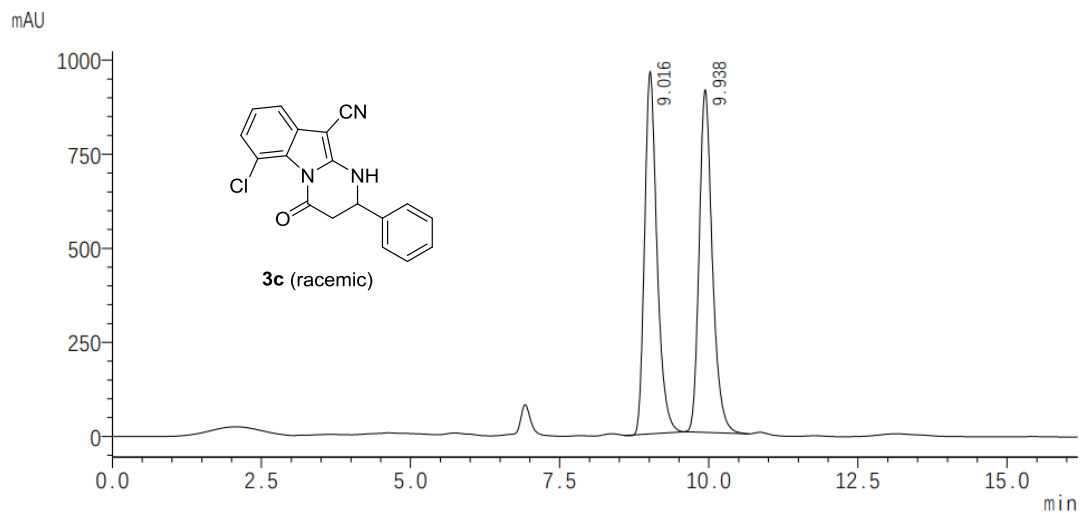

PDA Ch1 254nm

| Peak# | Ret. Time [min] | Area [mAU*s] | Height [mAU] | Area % | Hight % |
|-------|-----------------|--------------|--------------|--------|---------|
| 1     | 9.016           | 13923075     | 961822       | 49.855 | 51.371  |
| 2     | 9.938           | 14003852     | 910470       | 50.145 | 48.629  |

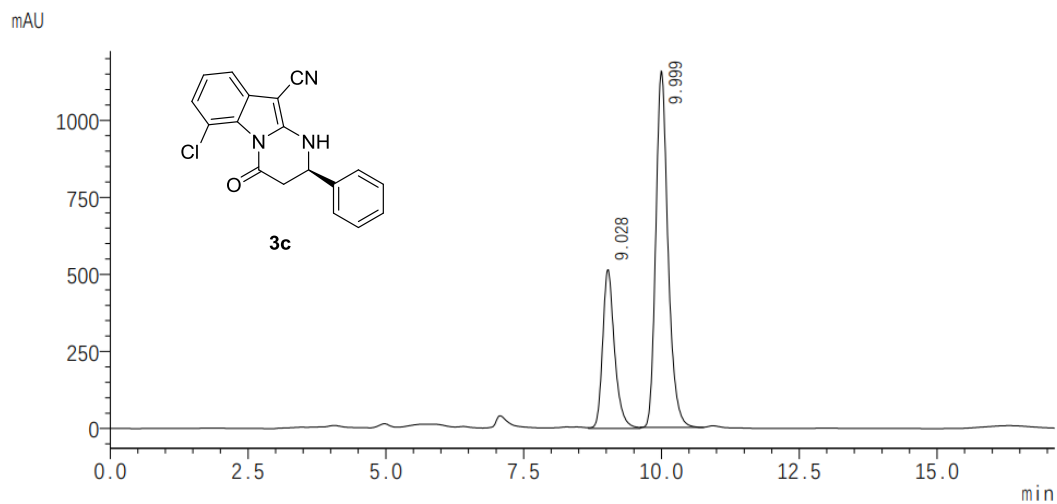

PDA Ch1 254nm

| Peak# | Ret. Time [min] | Area [mAU*s] | Height [mAU] | Area % | Hight % |
|-------|-----------------|--------------|--------------|--------|---------|
| 1     | 9.028           | 7789704      | 515591       | 30.379 | 30.857  |
| 2     | 9.999           | 17852313     | 1155331      | 69.621 | 69.143  |

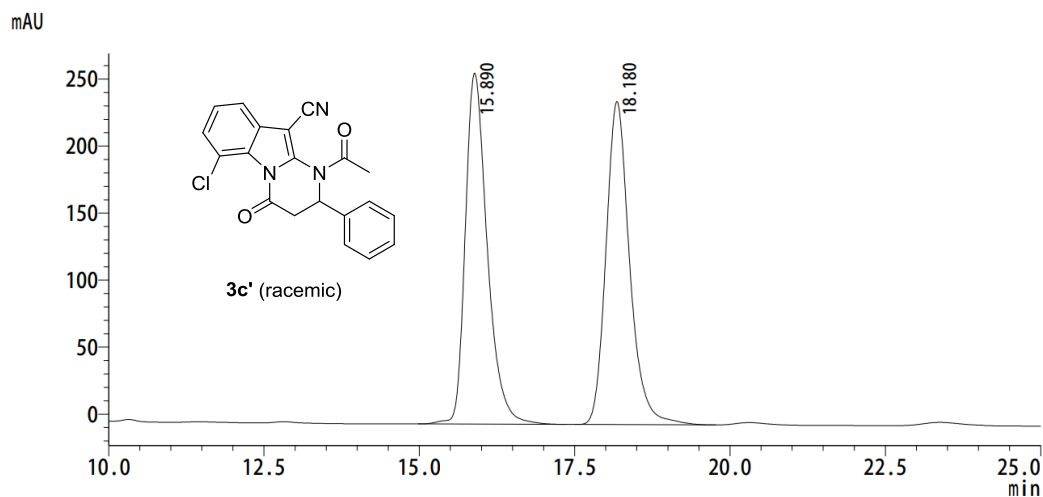

PDA Ch1 254nm

| Peak# | Ret. Time [min] | Area [mAU*s] | Hight [mAU] | Area % | Hight % |
|-------|-----------------|--------------|-------------|--------|---------|
| 1     | 15.890          | 6445577      | 261850      | 50.169 | 52.073  |
| 2     | 18.180          | 6402254      | 241005      | 49.831 | 47.927  |

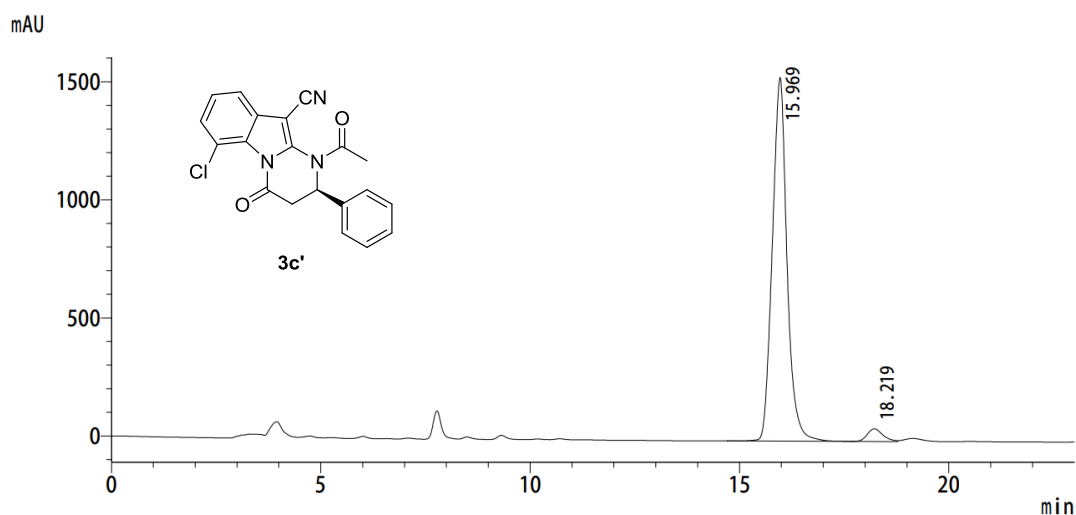

PDA Ch1 254nm

| Peak# | Ret. Time [min] | Area [mAU*s] | Hight [mAU] | Area % | Hight % |
|-------|-----------------|--------------|-------------|--------|---------|
| 1     | 15.969          | 37565870     | 1539364     | 96.441 | 96.637  |
| 2     | 18.219          | 1386317      | 53566       | 3.559  | 3.363   |

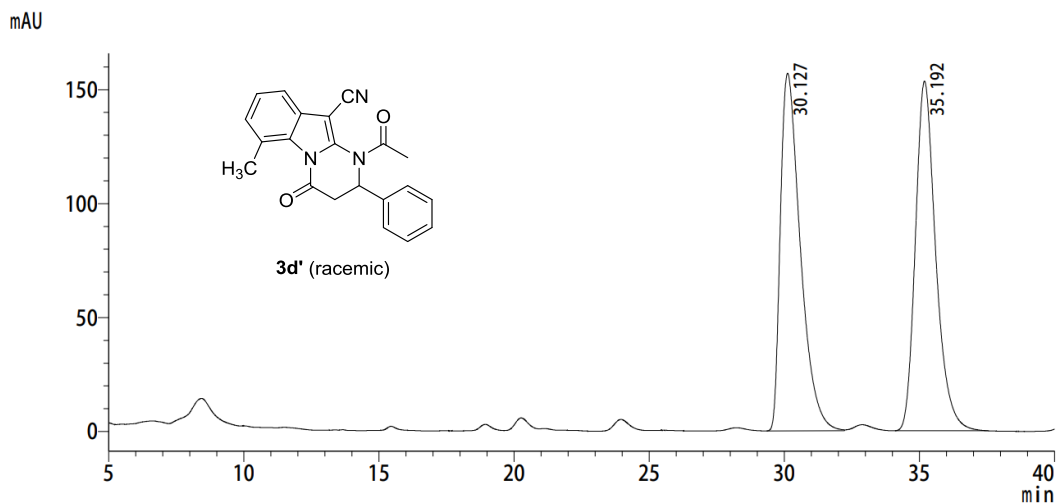

PDA Ch1 254nm

| Peak # | Ret. Time [min] | Area [mAU*s] | Hight [mAU] | Area % | Hight % |
|--------|-----------------|--------------|-------------|--------|---------|
| 1      | 30.127          | 8057517      | 156884      | 50.061 | 50.555  |
| 2      | 35.192          | 8037814      | 153440      | 49.939 | 49.445  |

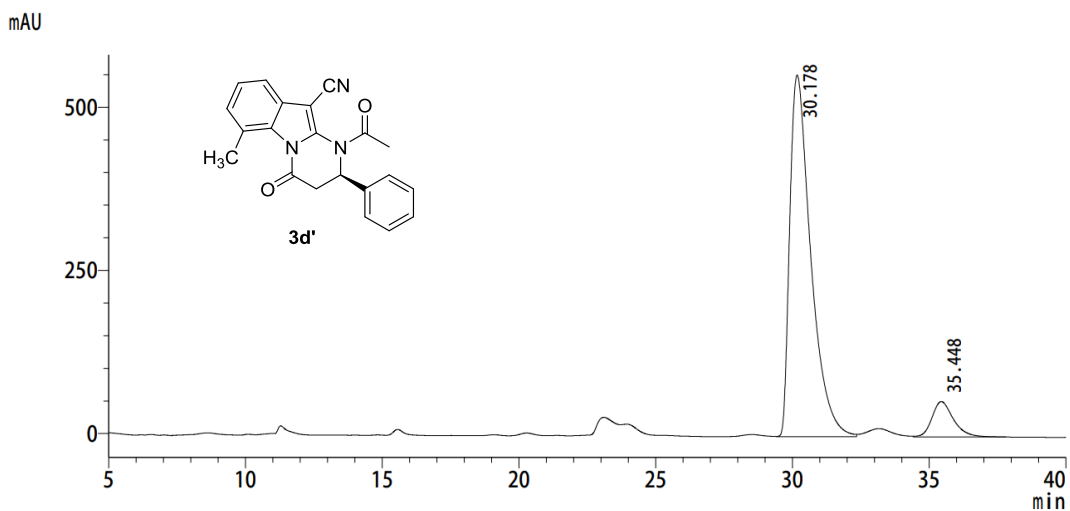

PDA Ch1 254nm

| Peak # | Ret. Time [min] | Area [mAU*s] | Hight [mAU] | Area % | Hight % |
|--------|-----------------|--------------|-------------|--------|---------|
| 1      | 30.178          | 29623830     | 554091      | 90.928 | 91.104  |
| 2      | 35.448          | 2955440      | 54105       | 9.072  | 8.896   |

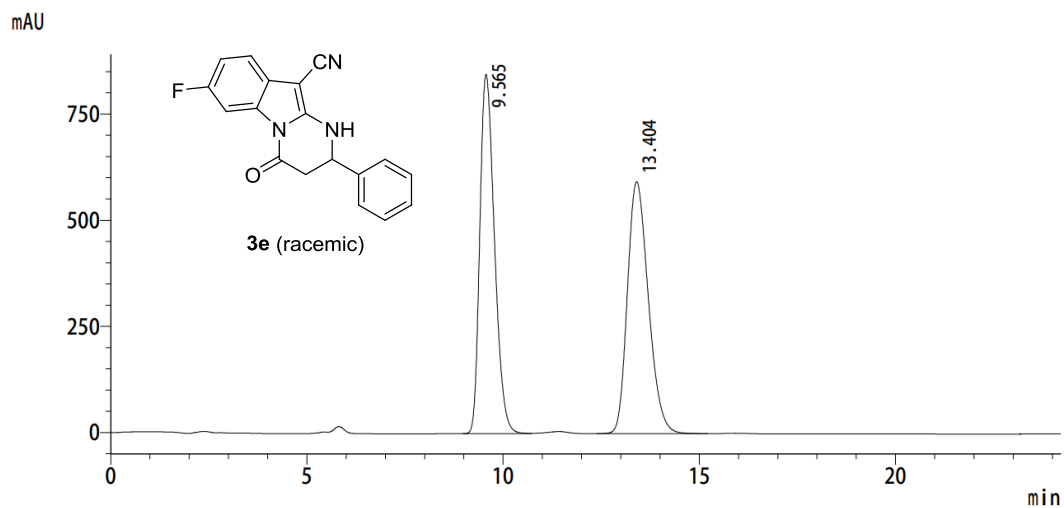

PDA Ch1 254nm

| Peak# | Ret. Time [min] | Area [mAU*s] | Height [mAU] | Area % | Height % |
|-------|-----------------|--------------|--------------|--------|----------|
| 1     | 9.565           | 21983654     | 846334       | 49.917 | 58.781   |
| 2     | 13.404          | 22056509     | 593472       | 50.083 | 41.219   |

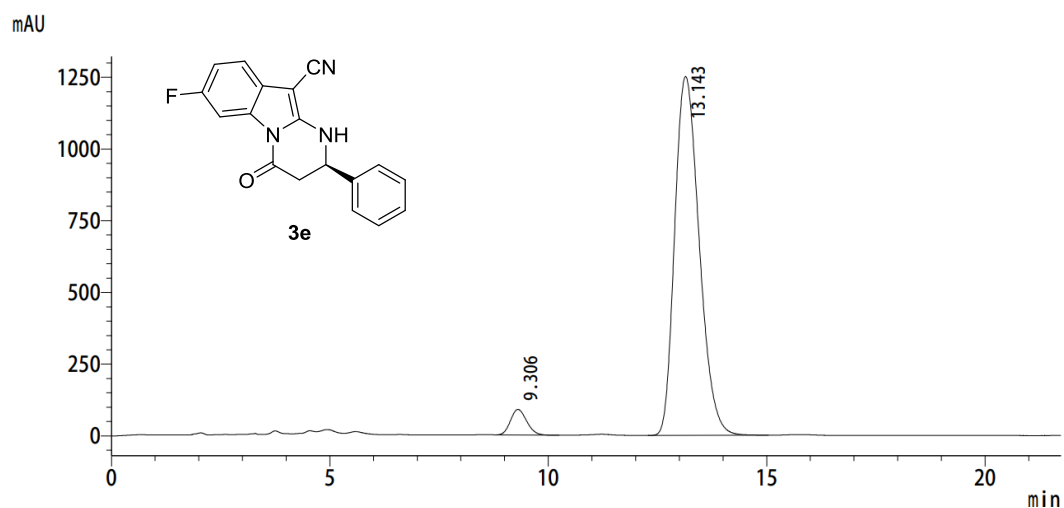

PDA Ch1 254nm

| Peak# | Ret. Time [min] | Area [mAU*s] | Height [mAU] | Area % | Height % |
|-------|-----------------|--------------|--------------|--------|----------|
| 1     | 9.306           | 2308916      | 89494        | 4.528  | 6.677    |
| 2     | 13.143          | 48686883     | 1250898      | 95.472 | 93.323   |

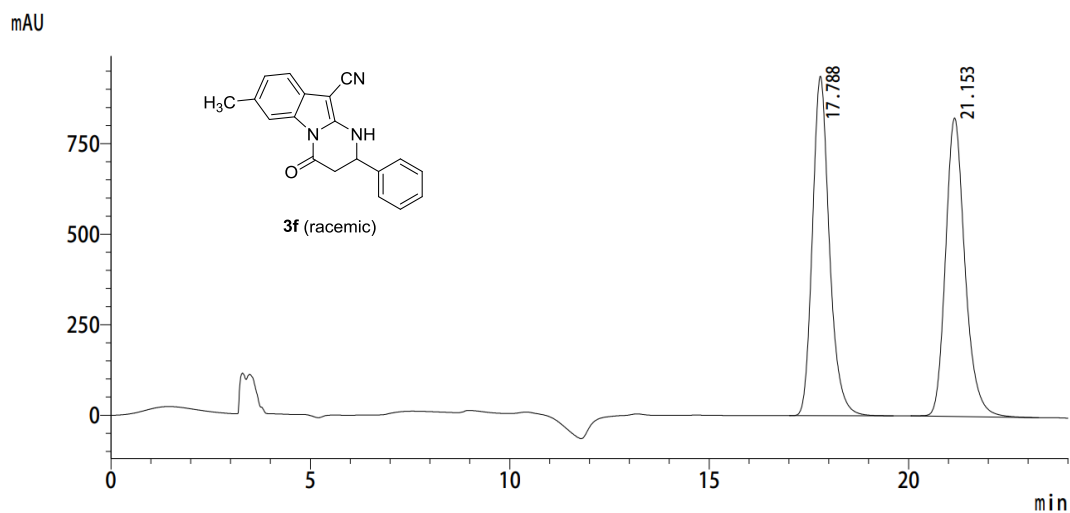

PDA Ch1 254nm

| Peak# | Ret. Time [min] | Area [mAU*s] | Height [mAU] | Area % | Height % |
|-------|-----------------|--------------|--------------|--------|----------|
| 1     | 17.788          | 27744260     | 937424       | 49.811 | 53.198   |
| 2     | 21.153          | 27954554     | 824710       | 50.189 | 46.802   |

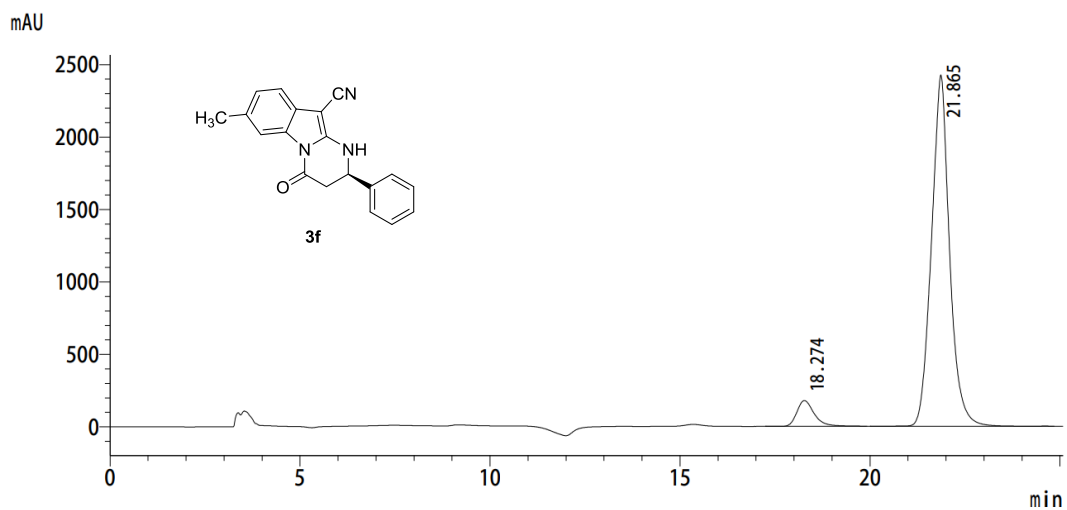

PDA Ch1 254nm

| Peak# | Ret. Time [min] | Area [mAU*s] | Hight [mAU] | Area % | Hight % |
|-------|-----------------|--------------|-------------|--------|---------|
| 1     | 18.274          | 5626591      | 177943      | 6.567  | 6.842   |
| 2     | 21.865          | 80049160     | 2422767     | 93.433 | 93.158  |

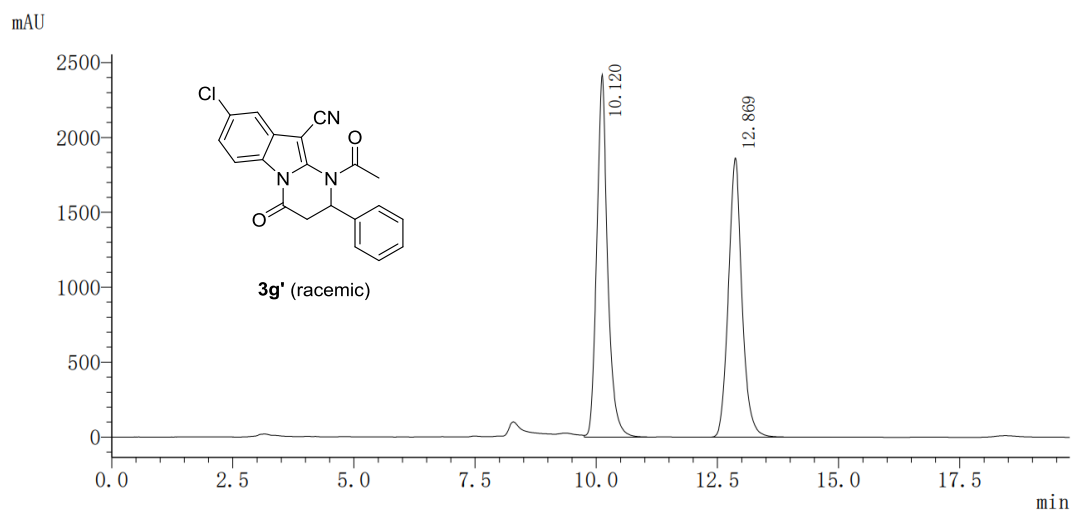

PDA Ch1 254nm

| Peak # | Ret. Time [min] | Area [mAU*s] | Hight [mAU] | Area % | Hight % |
|--------|-----------------|--------------|-------------|--------|---------|
| 1      | 10.120          | 37536444     | 2419430     | 50.854 | 56.499  |
| 2      | 12.869          | 36276278     | 1862798     | 49.146 | 43.501  |

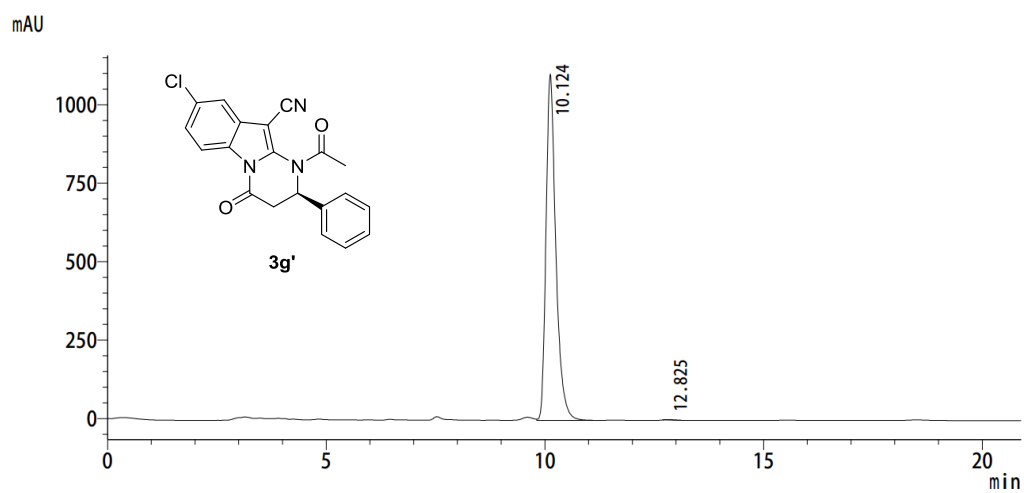

PDA Ch1 254nm

| Peak# | Ret. Time [min] | Area [mAU*s] | Hight [mAU] | Area % | Hight % |
|-------|-----------------|--------------|-------------|--------|---------|
| 1     | 10.124          | 17250470     | 1101452     | 99.869 | 99.855  |
| 2     | 12.825          | 22604        | 1600        | 0.131  | 0.145   |

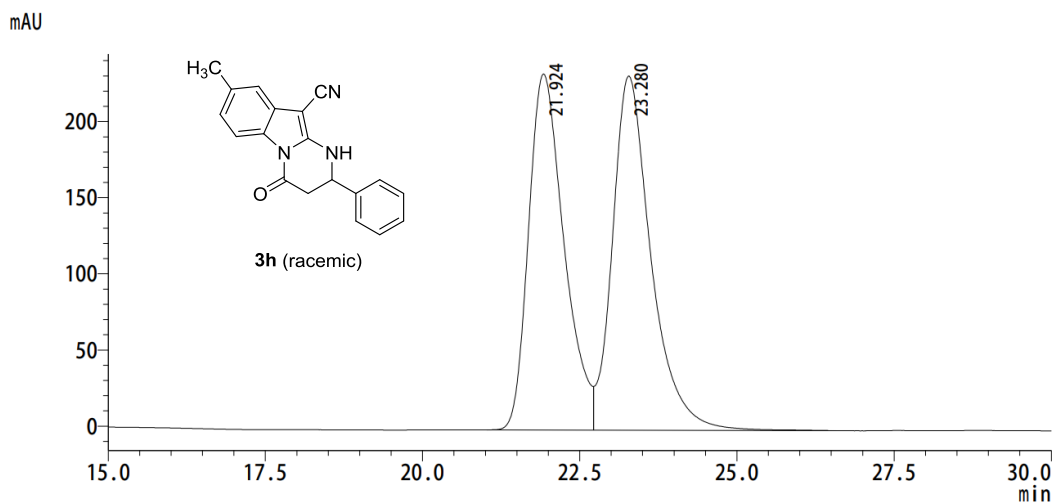

PDA Ch1 254nm

| Peak# | Ret. Time [min] | Area [mAU*s] | Height [mAU] | Area % | Height % |
|-------|-----------------|--------------|--------------|--------|----------|
| 1     | 21.924          | 9191345      | 233762       | 48.052 | 50.132   |
| 2     | 23.280          | 9936688      | 232533       | 51.948 | 49.868   |

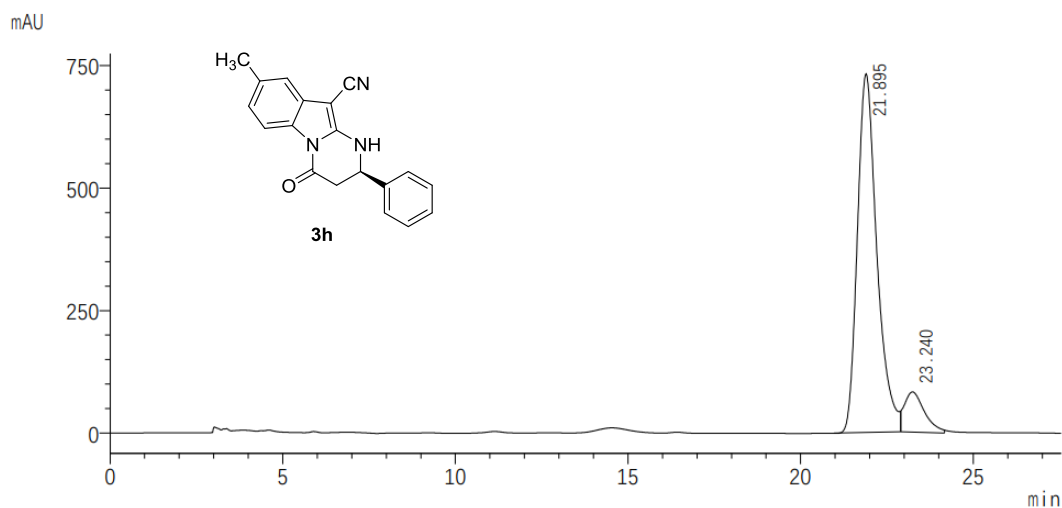

PDA Ch1 254nm

| Peak# | Ret. Time [min] | Area [mAU*s] | Height [mAU] | Area % | Height % |
|-------|-----------------|--------------|--------------|--------|----------|
| 1     | 21.895          | 28784850     | 731603       | 89.650 | 89.905   |
| 2     | 23.240          | 3323122      | 82152        | 10.350 | 10.095   |

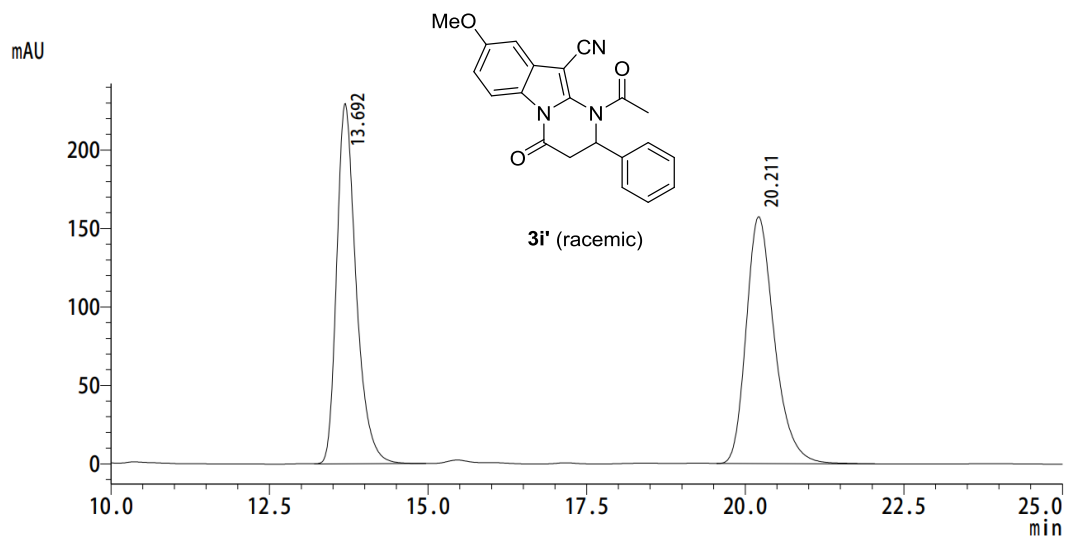

PDA Ch1 254nm

| Peak # | Ret. Time [min] | Area [mAU*s] | Hight [mAU] | Area % | Hight % |
|--------|-----------------|--------------|-------------|--------|---------|
| 1      | 13.692          | 4889912      | 229531      | 50.061 | 59.327  |
| 2      | 20.211          | 4877985      | 157358      | 49.939 | 40.673  |

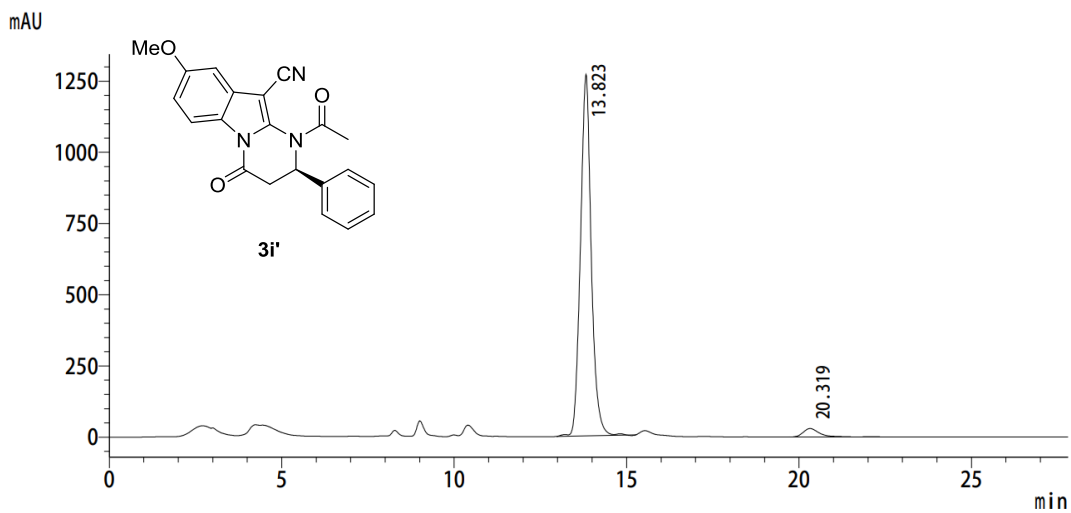

PDA Ch1 254nm

| Peak# | Ret. Time [min] | Area [mAU*s] | Hight [mAU] | Area % | Hight % |
|-------|-----------------|--------------|-------------|--------|---------|
| 1     | 13.823          | 27589754     | 1268924     | 96.500 | 97.718  |
| 2     | 20.319          | 1000536      | 29632       | 3.500  | 2.282   |



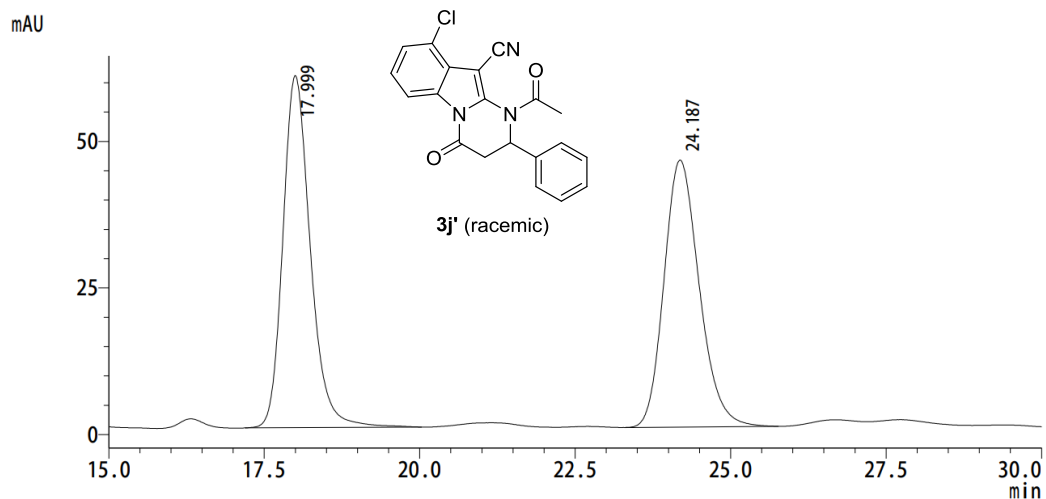

PDA Ch1 254nm

| Peak# | Ret. Time [min] | Area [mAU*s] | Height [mAU] | Area % | Hight % |
|-------|-----------------|--------------|--------------|--------|---------|
| 1     | 17.999          | 1845865      | 60046        | 50.684 | 56.863  |
| 2     | 24.187          | 1796039      | 45552        | 49.316 | 43.137  |

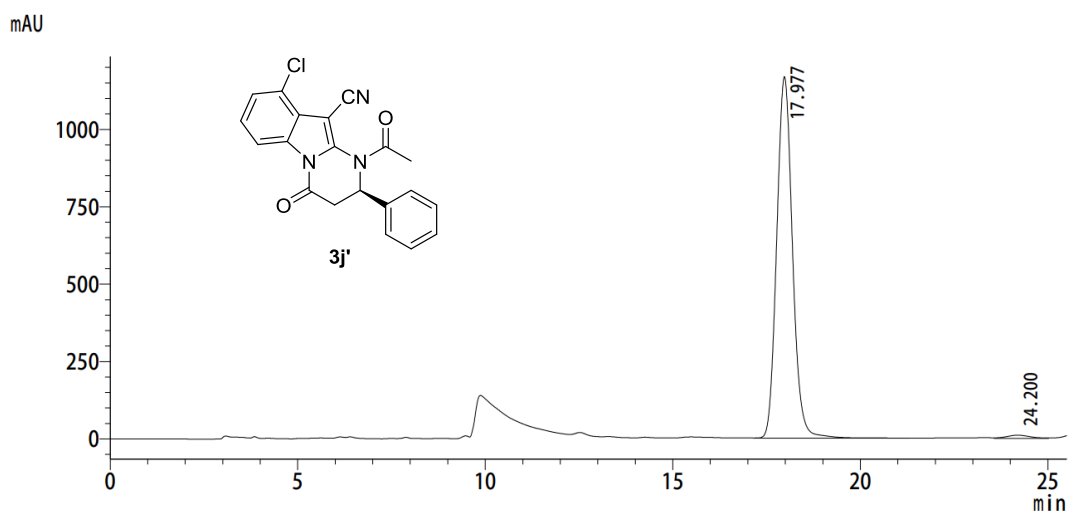

PDA Ch1 254nm

| Peak# | Ret. Time [min] | Area [mAU*s] | Height [mAU] | Area % | Height % |
|-------|-----------------|--------------|--------------|--------|----------|
| 1     | 17.977          | 34058008     | 1167274      | 98.697 | 99.131   |
| 2     | 24.200          | 449801       | 10232        | 1.303  | 0.869    |

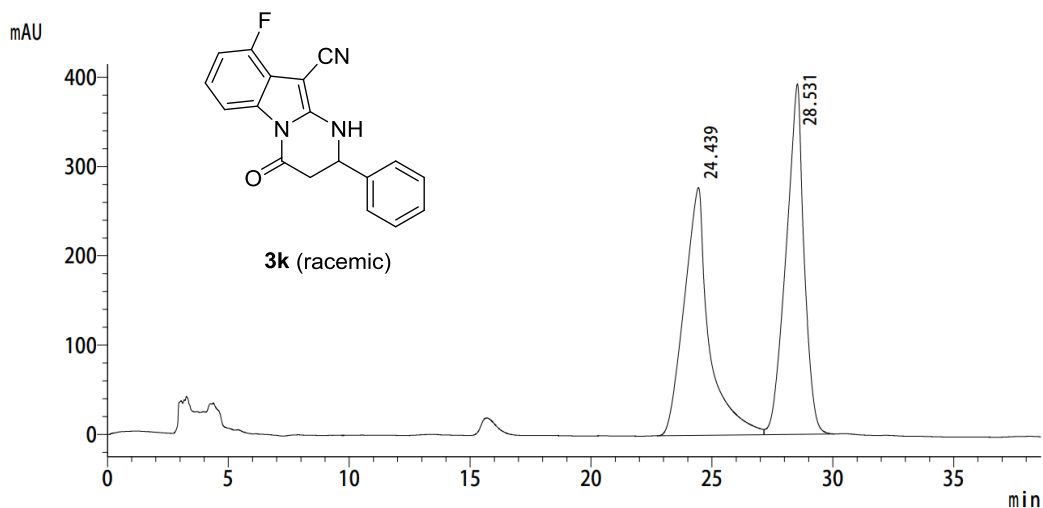

PDA Ch1 254nm

| Peak# | Ret. Time [min] | Area [mAU*s] | Height [mAU] | Area % | Height % |
|-------|-----------------|--------------|--------------|--------|----------|
| 1     | 24.439          | 19873109     | 277670       | 49.423 | 41.422   |
| 2     | 28.531          | 20337455     | 392672       | 50.577 | 58.578   |

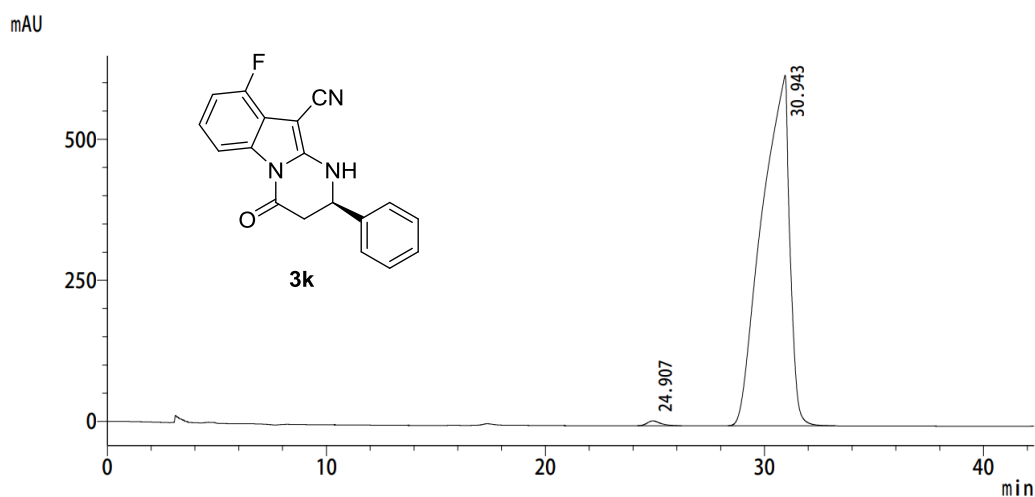

PDA Ch1 254nm

| Peak# | Ret. Time [min] | Area [mAU*s] | Height [mAU] | Area % | Height % |
|-------|-----------------|--------------|--------------|--------|----------|
| 1     | 24.907          | 363967       | 8600         | 0.661  | 1.366    |
| 2     | 30.943          | 54726874     | 620835       | 99.339 | 98.634   |

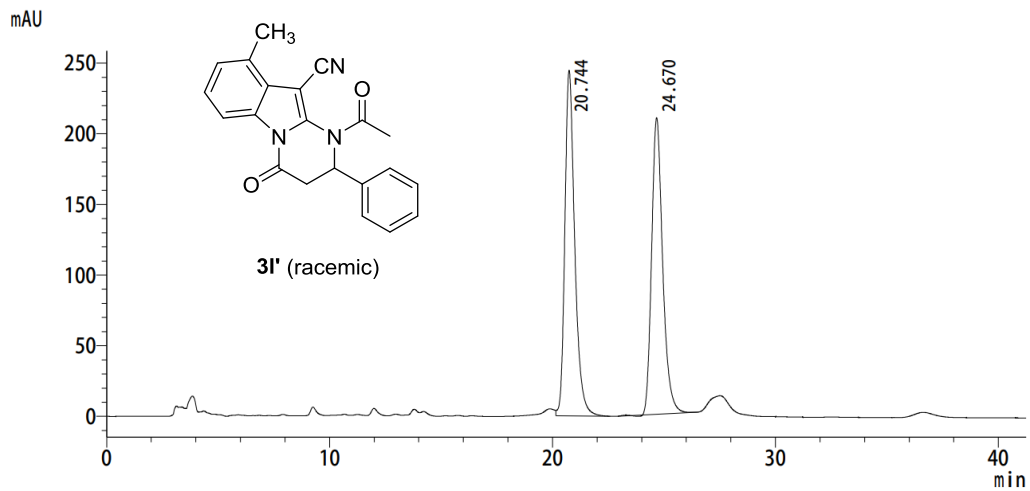

PDA Ch1 254nm

| Peak# | Ret. Time [min] | Area [mAU*s] | Height [mAU] | Area % | Height % |
|-------|-----------------|--------------|--------------|--------|----------|
| 1     | 20.744          | 7528445      | 244564       | 51.014 | 53.814   |
| 2     | 24.670          | 7229293      | 209900       | 48.986 | 46.186   |

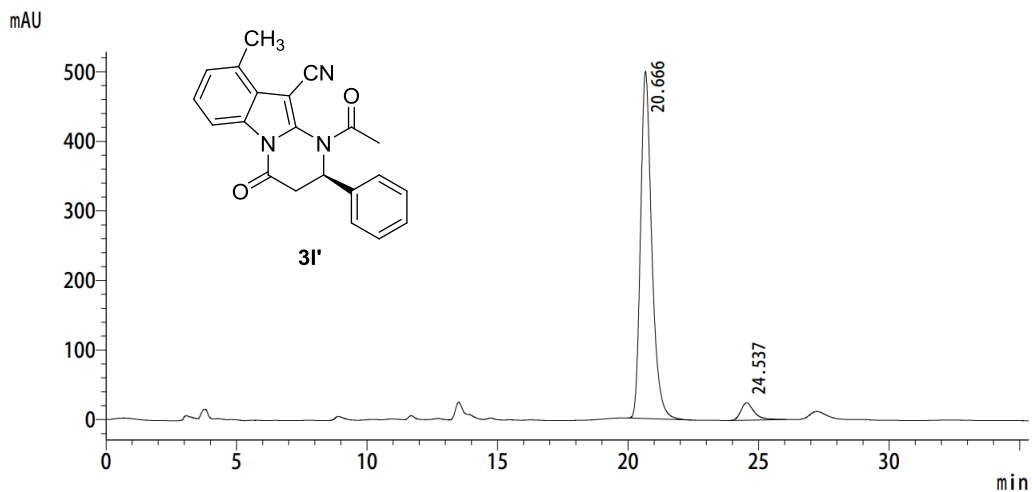

PDA Ch1 254nm

| Peak# | Ret. Time [min] | Area [mAU*s] | Height [mAU] | Area % | Hight % |
|-------|-----------------|--------------|--------------|--------|---------|
| 1     | 20.666          | 14896185     | 499087       | 94.381 | 95.254  |
| 2     | 24.537          | 886825       | 24864        | 5.619  | 4.746   |

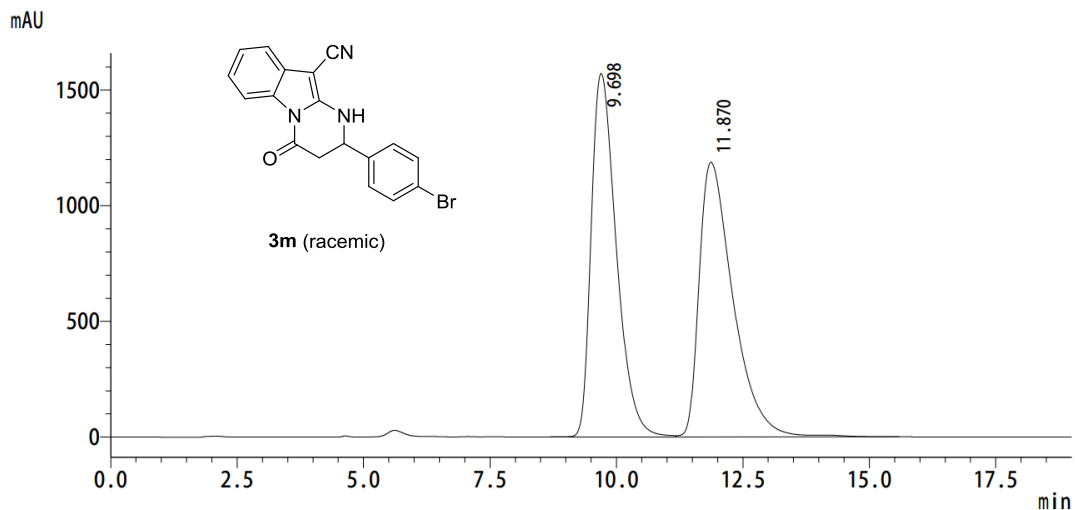

PDA Ch1 254nm

| Peak# | Ret. Time [min] | Area [mAU*s] | Height [mAU] | Area % | Height % |
|-------|-----------------|--------------|--------------|--------|----------|
| 1     | 9.698           | 54280600     | 1570765      | 49.530 | 56.955   |
| 2     | 11.870          | 55311736     | 1187133      | 50.470 | 43.045   |

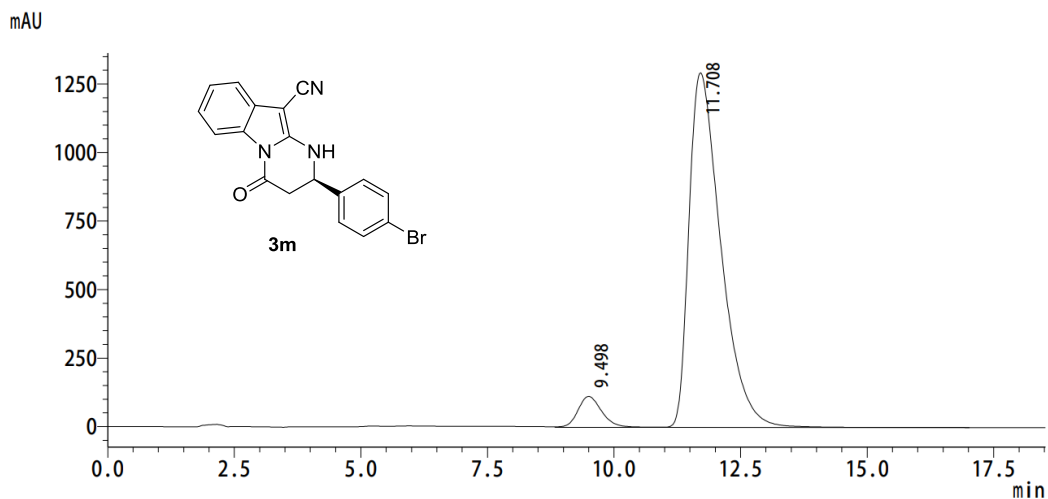

PDA Ch1 254nm

| Peak# | Ret. Time [min] | Area [mAU*s] | Height [mAU] | Area % | Height % |
|-------|-----------------|--------------|--------------|--------|----------|
| 1     | 9.498           | 3713397      | 112918       | 6.151  | 8.029    |
| 2     | 11.708          | 56656395     | 1293467      | 93.849 | 91.971   |

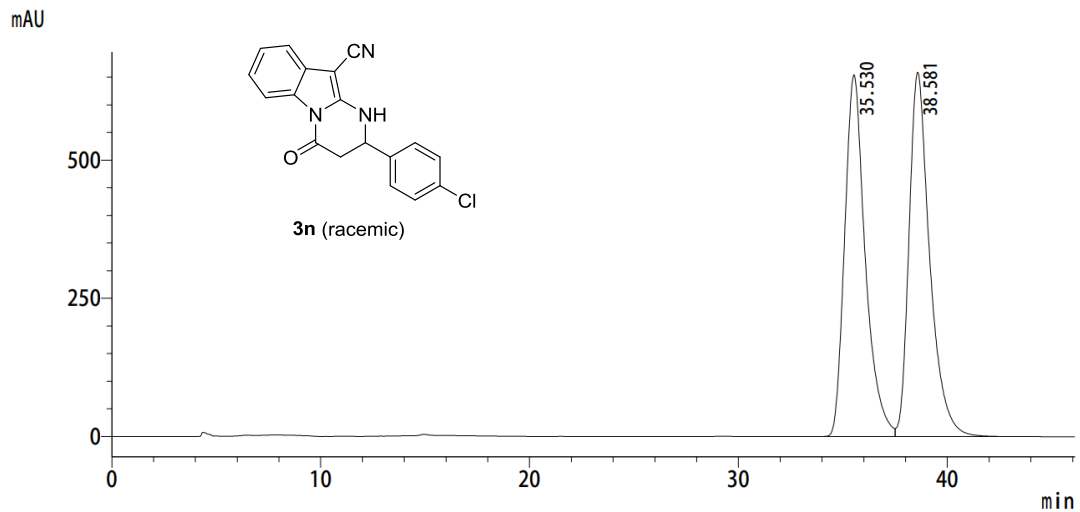

PDA Ch1 254nm

| Peak# | Ret. Time [min] | Area [mAU*s] | Height [mAU] | Area % | Height % |
|-------|-----------------|--------------|--------------|--------|----------|
| 1     | 35.530          | 44827959     | 654273       | 49.679 | 49.830   |
| 2     | 38.581          | 45407905     | 658732       | 50.321 | 50.170   |

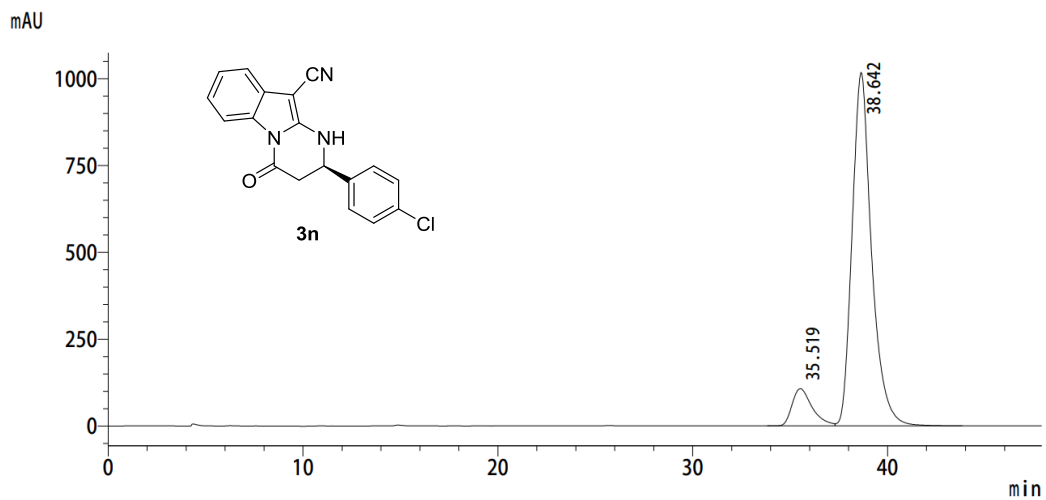

PDA Ch1 254nm

| Peak# | Ret. Time [min] | Area [mAU*s] | Hight [mAU] | Area % | Hight % |
|-------|-----------------|--------------|-------------|--------|---------|
| 1     | 35.519          | 7698932      | 107113      | 9.826  | 9.527   |
| 2     | 38.642          | 70651089     | 1017166     | 90.174 | 90.473  |

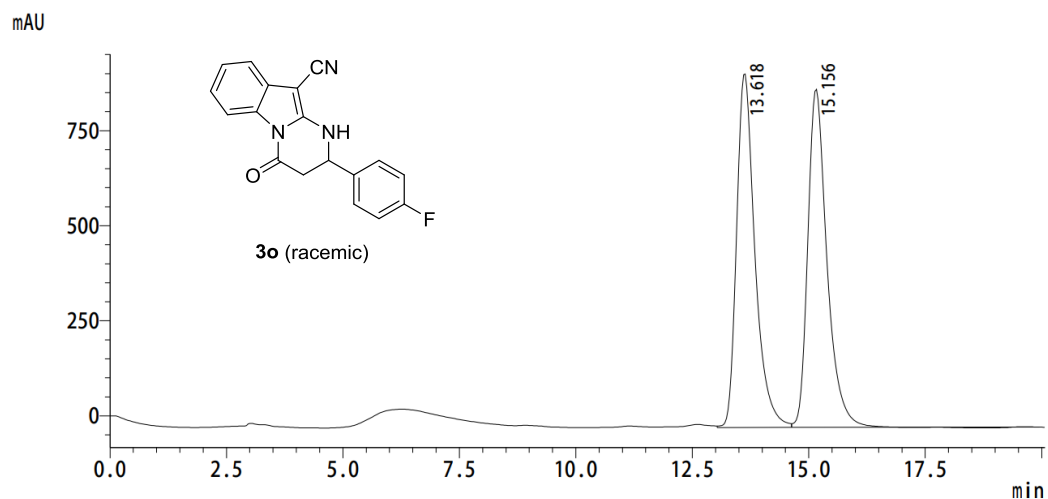

PDA Ch1 254nm

| Peak# | Ret. Time [min] | Area [mAU*s] | Height [mAU] | Area % | Height % |
|-------|-----------------|--------------|--------------|--------|----------|
| 1     | 13.618          | 25452729     | 929497       | 50.116 | 51.103   |
| 2     | 15.156          | 25335164     | 889388       | 49.884 | 48.897   |

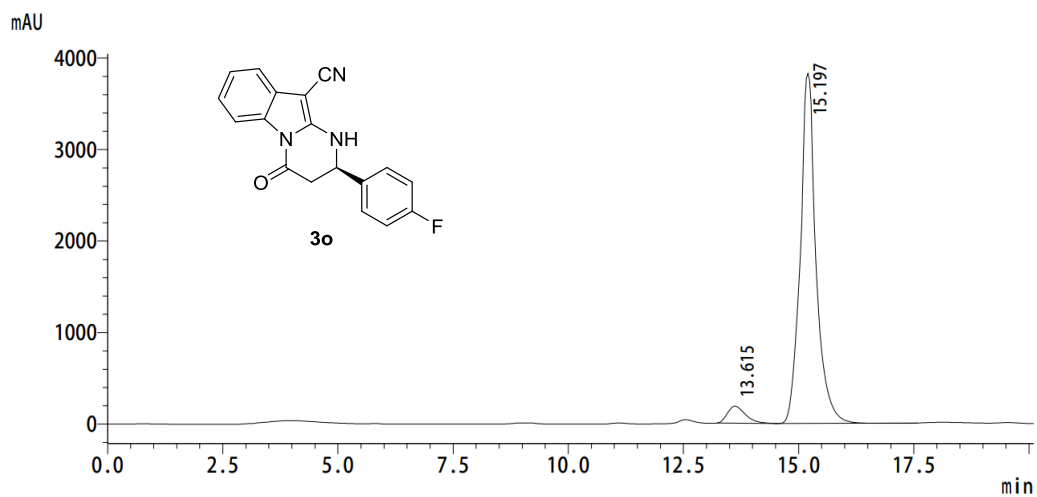

PDA Ch1 254nm

| Peak# | Ret. Time [min] | Area [mAU*s] | Hight [mAU] | Area % | Hight % |
|-------|-----------------|--------------|-------------|--------|---------|
| 1     | 13.615          | 5025183      | 185894      | 5.236  | 4.636   |
| 2     | 15.197          | 90940005     | 3823504     | 94.764 | 95.364  |

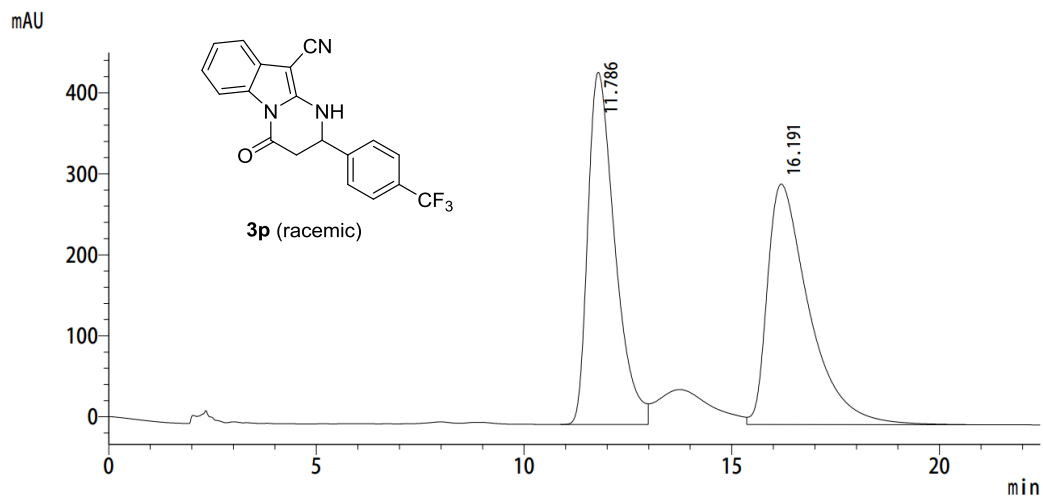

PDA Ch1 254nm

| Peak# | Ret. Time [min] | Area [mAU*s] | Height [mAU] | Area % | Height % |
|-------|-----------------|--------------|--------------|--------|----------|
| 1     | 11.786          | 19644789     | 434764       | 48.697 | 59.418   |
| 2     | 16.191          | 20695901     | 296943       | 51.303 | 40.582   |

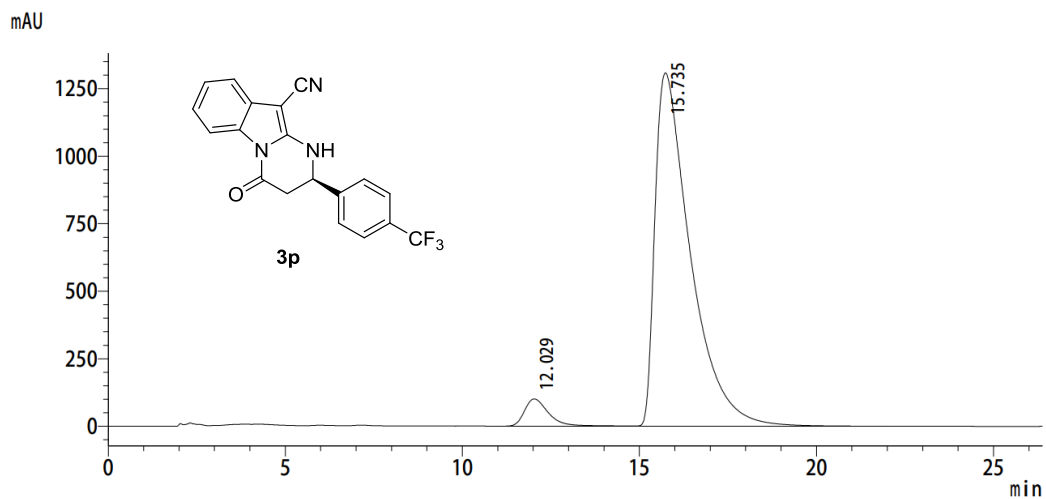

PDA Ch1 254nm

| Peak# | Ret. Time [min] | Area [mAU*s] | Height [mAU] | 面积 %   | Height % |
|-------|-----------------|--------------|--------------|--------|----------|
| 1     | 12.029          | 4806375      | 100748       | 5.013  | 7.151    |
| 2     | 15.735          | 91064396     | 1308186      | 94.987 | 92.849   |

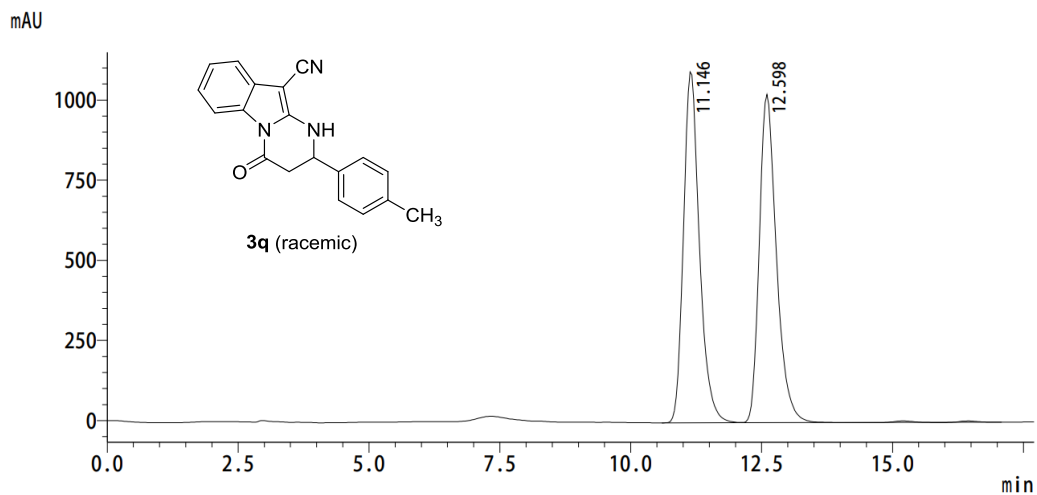

PDA Ch1 254nm

| Peak# | Ret. Time [min] | Area [mAU*s] | Height [mAU] | Area % | Height % |
|-------|-----------------|--------------|--------------|--------|----------|
| 1     | 11.146          | 23221039     | 1094659      | 49.784 | 51.668   |
| 2     | 12.598          | 23422741     | 1023968      | 50.216 | 48.332   |

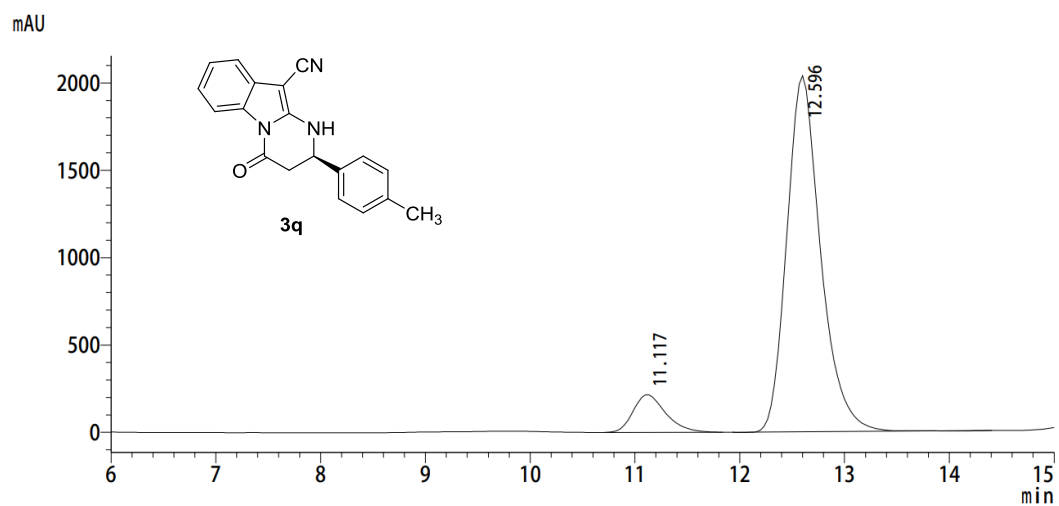

PDA Ch1 254nm

| Peak# | Ret. Time [min] | Area [mAU*s] | Hight [mAU] | Area % | Hight % |
|-------|-----------------|--------------|-------------|--------|---------|
| 1     | 11.117          | 4658563      | 213992      | 9.257  | 9.500   |
| 2     | 12.596          | 45666905     | 2038486     | 90.743 | 90.500  |



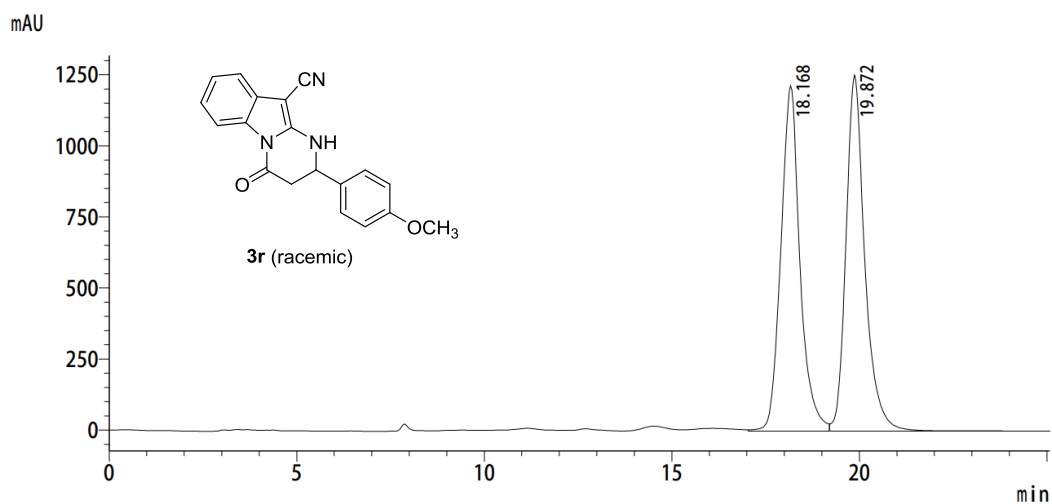

PDA Ch1 254nm

| Peak# | Ret. Time [min] | Area [mAU*s] | Height [mAU] | Area % | Height % |
|-------|-----------------|--------------|--------------|--------|----------|
| 1     | 18.168          | 43004787     | 1215731      | 49.540 | 49.267   |
| 2     | 19.872          | 43802876     | 1251902      | 50.460 | 50.733   |

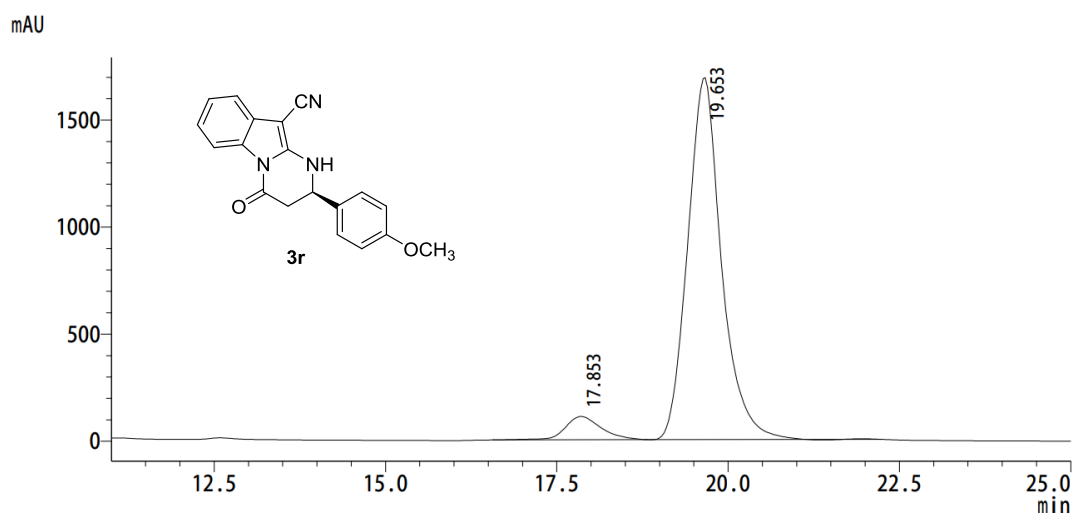

PDA Ch1 254nm

| Peak# | Ret. Time [min] | Area [mAU*s] | Hight [mAU] | Area % | Hight % |
|-------|-----------------|--------------|-------------|--------|---------|
| 1     | 17.853          | 3989371      | 108659      | 6.444  | 6.041   |
| 2     | 19.653          | 57915891     | 1689946     | 93.556 | 93.959  |

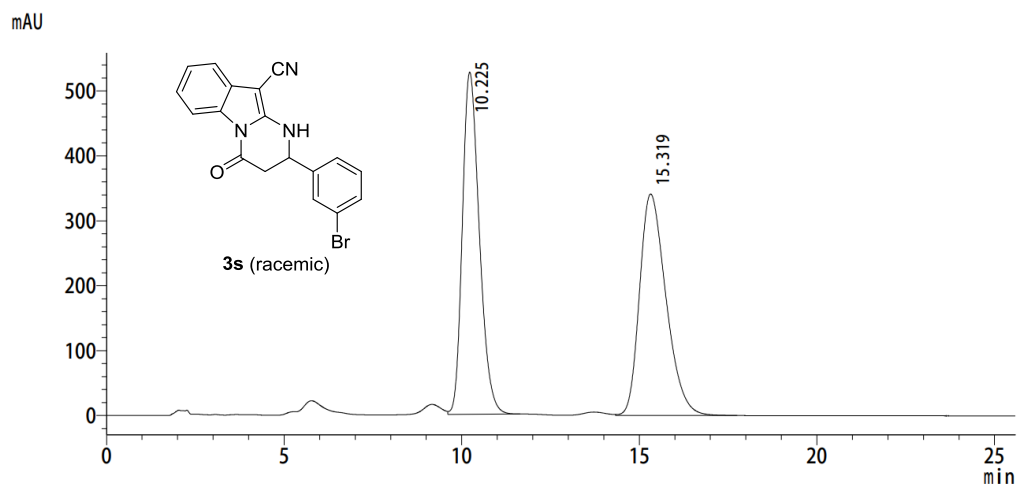

PDA Ch1 254nm

| Peak# | Ret. Time [min] | Area [mAU*s] | Hight [mAU] | Area % | Hight % |
|-------|-----------------|--------------|-------------|--------|---------|
| 1     | 10.225          | 17551233     | 527407      | 49.836 | 60.721  |
| 2     | 15.319          | 17666879     | 341164      | 50.164 | 39.279  |

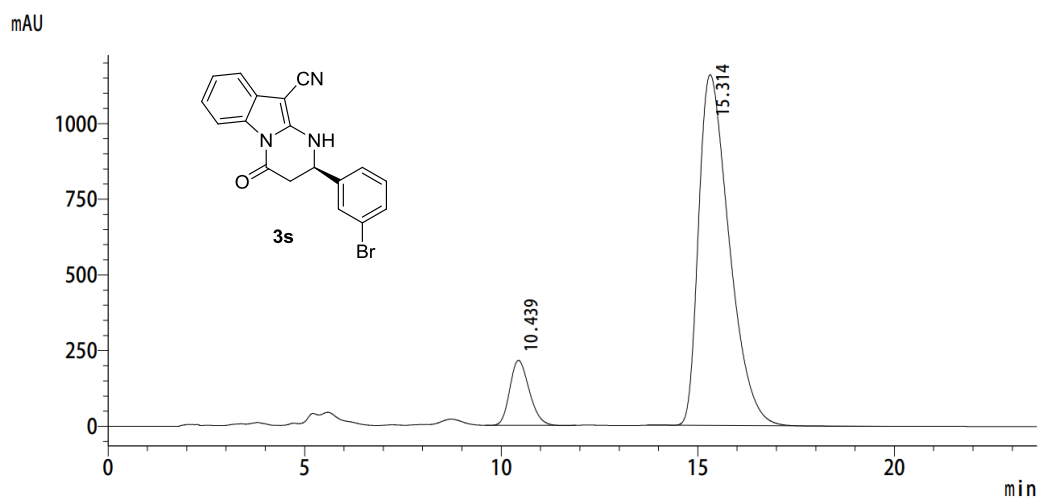

PDA Ch1 254nm

| Peak# | Ret. Time [min] | Area [mAU*s] | Hight [mAU] | Area % | Hight % |
|-------|-----------------|--------------|-------------|--------|---------|
| 1     | 10.439          | 7342590      | 214645      | 10.496 | 15.637  |
| 2     | 15.314          | 62614241     | 1158042     | 89.504 | 84.363  |

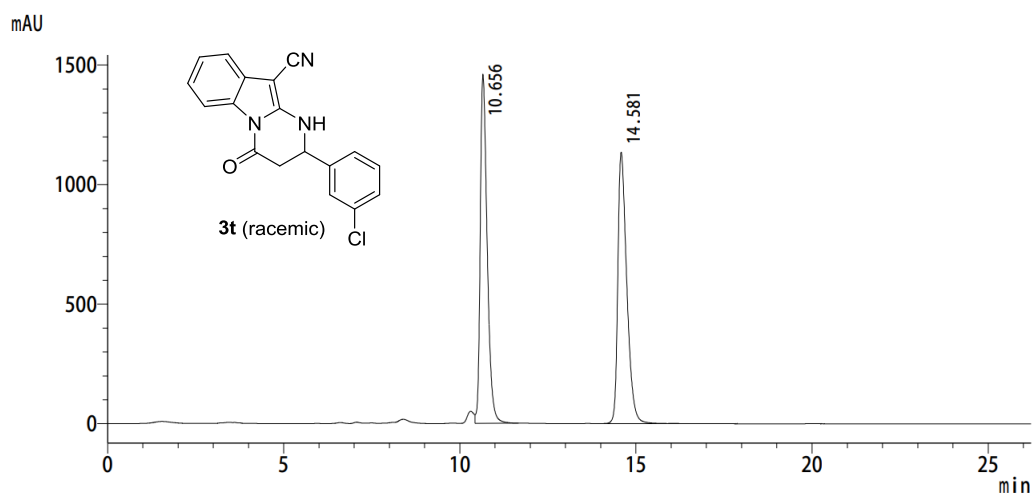

PDA Ch1 254nm

| Peak# | Ret. Time [min] | Area [mAU*s] | Height [mAU] | Area % | Height % |
|-------|-----------------|--------------|--------------|--------|----------|
| 1     | 10.656          | 20011635     | 1458850      | 49.790 | 56.234   |
| 2     | 14.581          | 20180534     | 1135380      | 50.210 | 43.766   |

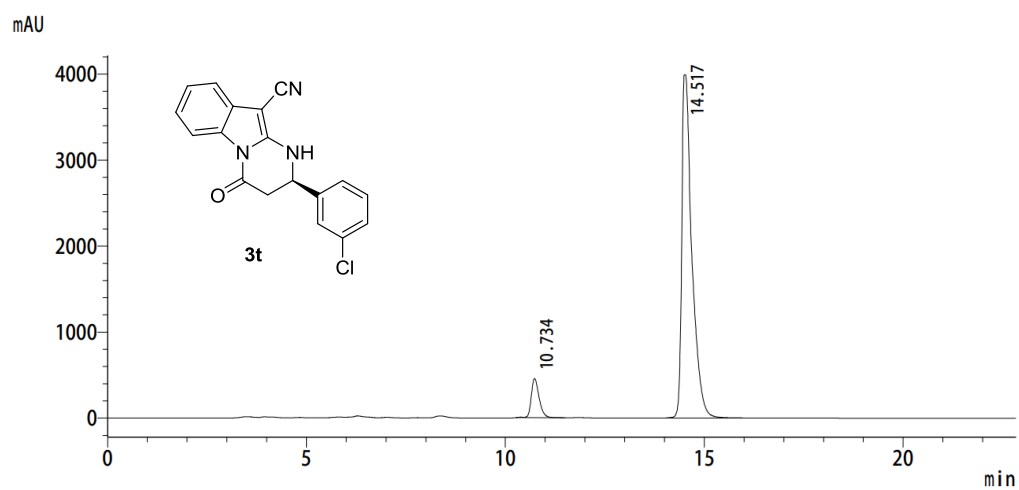

PDA Ch1 254nm

| Peak# | Ret. Time | Area [mAU*s] | Hight [mAU] | Area % | Hight % |
|-------|-----------|--------------|-------------|--------|---------|
| 1     | 10.734    | 6246011      | 454968      | 8.125  | 10.229  |
| 2     | 14.517    | 70629071     | 3992982     | 91.875 | 89.771  |

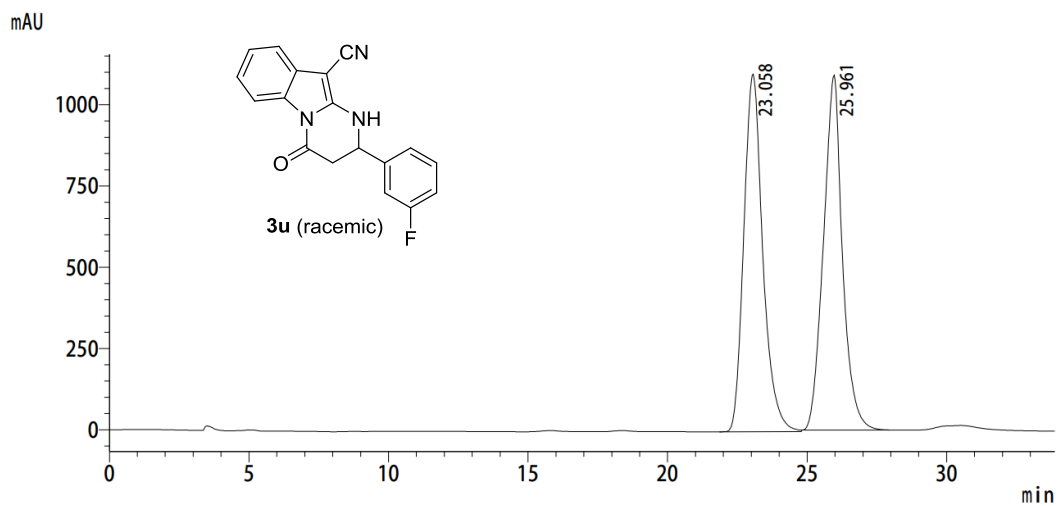

PDA Ch1 254nm

| Peak# | Ret. Time [min] | Area [mAU*s] | Height [mAU] | Area % | Height % |
|-------|-----------------|--------------|--------------|--------|----------|
| 1     | 23.058          | 52030130     | 1099952      | 50.213 | 50.190   |
| 2     | 25.961          | 51588910     | 1091645      | 49.787 | 49.810   |

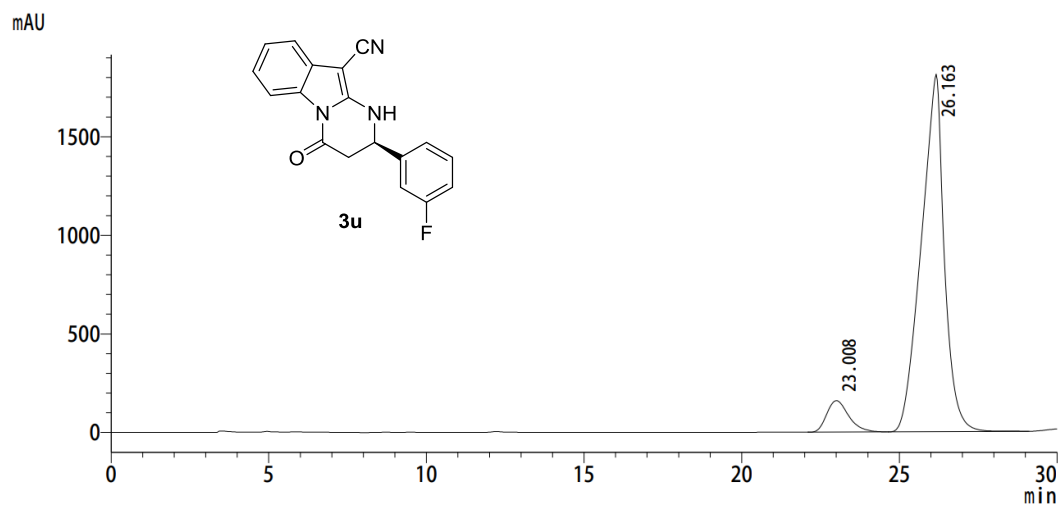

PDA Ch1 254nm

| Peak# | Ret. Time [min] | Area [mAU*s] | Hight [mAU] | Area % | Hight % |
|-------|-----------------|--------------|-------------|--------|---------|
| 1     | 23.008          | 7754280      | 159834      | 7.758  | 8.111   |
| 2     | 26.163          | 92198764     | 1810650     | 92.242 | 91.889  |

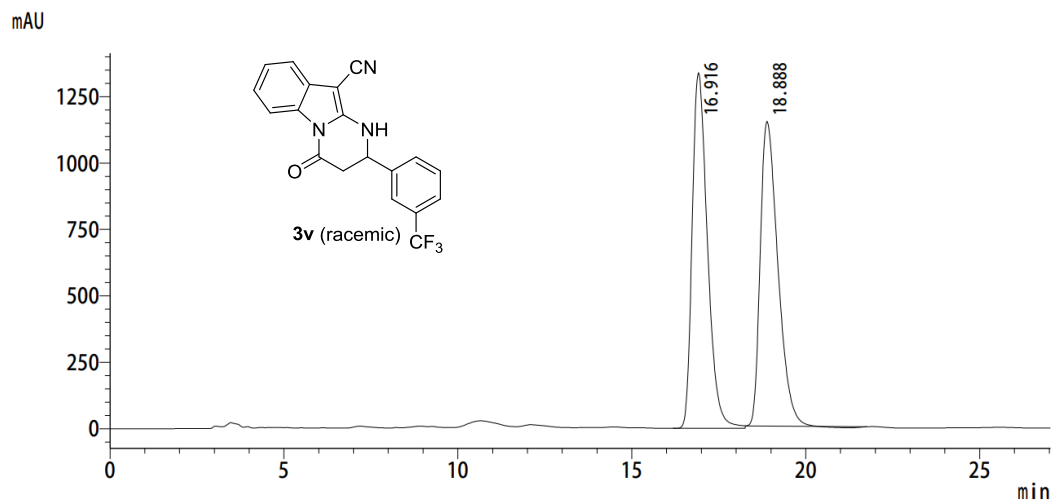

PDA Ch1 254nm

| Peak# | Ret. Time [min] | Area [mAU*s] | Height [mAU] | Area % | Height % |
|-------|-----------------|--------------|--------------|--------|----------|
| 1     | 16.916          | 40968881     | 1337657      | 50.450 | 53.840   |
| 2     | 18.888          | 40237342     | 1146847      | 49.550 | 46.160   |

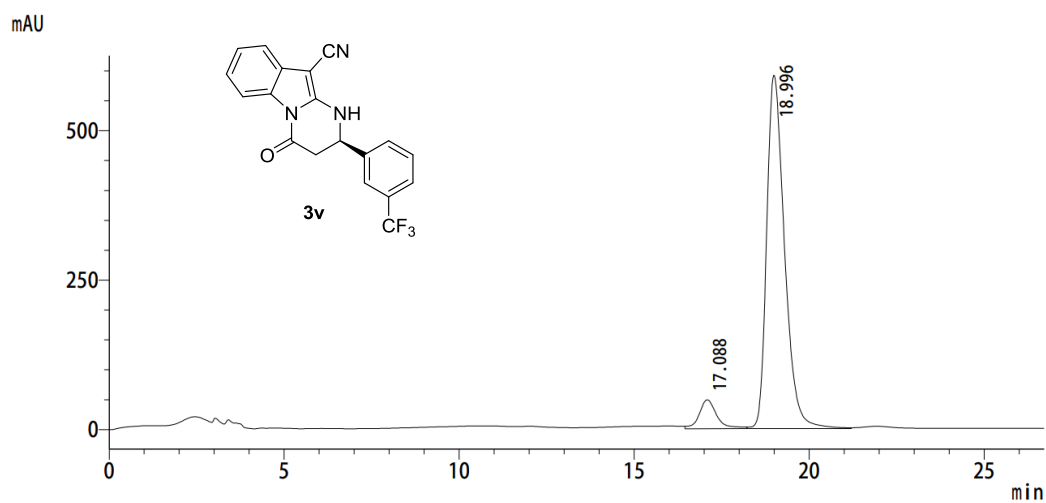

PDA Ch1 254nm

| Peak# | Ret. Time [min] | Area [mAU*s] | Hight [mAU] | Area % | Hight % |
|-------|-----------------|--------------|-------------|--------|---------|
| 1     | 17.088          | 1694542      | 48410       | 7.484  | 7.572   |
| 2     | 18.996          | 20948723     | 590951      | 92.516 | 92.428  |

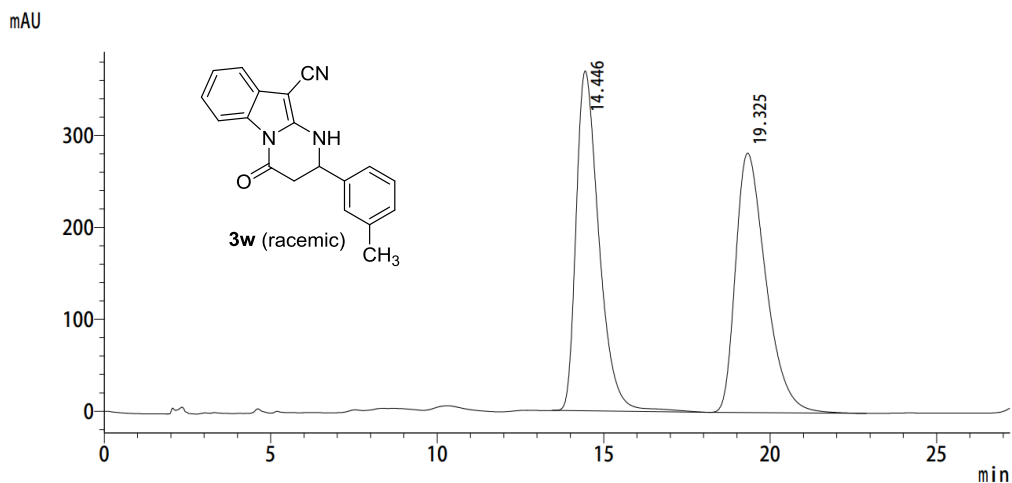

PDA Ch1 254nm

| Peak# | Ret. Time [min] | Area [mAU*s] | Height [mAU] | Area % | Height % |
|-------|-----------------|--------------|--------------|--------|----------|
| 1     | 14.446          | 17702961     | 369782       | 49.744 | 56.705   |
| 2     | 19.325          | 17884963     | 282333       | 50.256 | 43.295   |

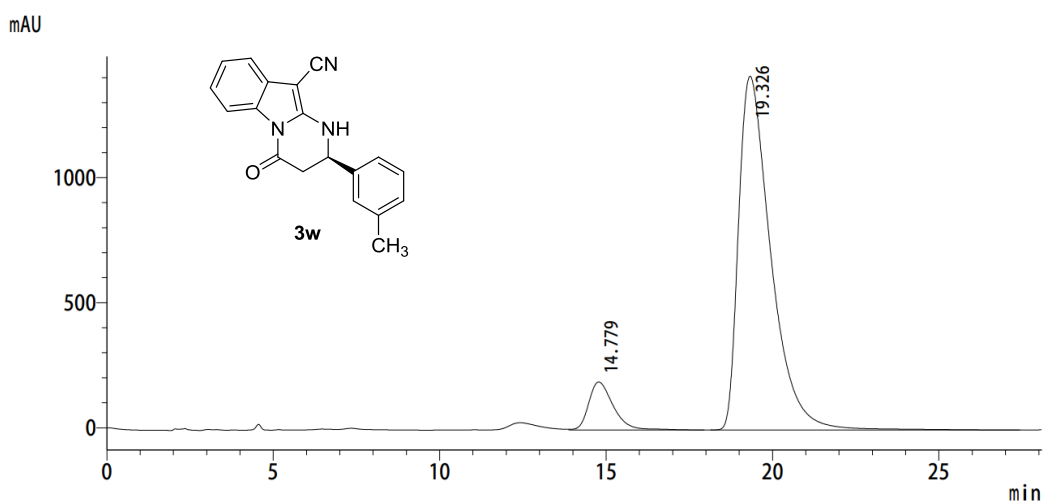

PDA Ch1 254nm

| Peak# | Ret. Time [min] | Area [mAU*s] | Height [mAU] | Area % | Height % |
|-------|-----------------|--------------|--------------|--------|----------|
| 1     | 14.779          | 9829394      | 191966       | 9.324  | 11.951   |
| 2     | 19.326          | 95587043     | 1414268      | 90.676 | 88.049   |

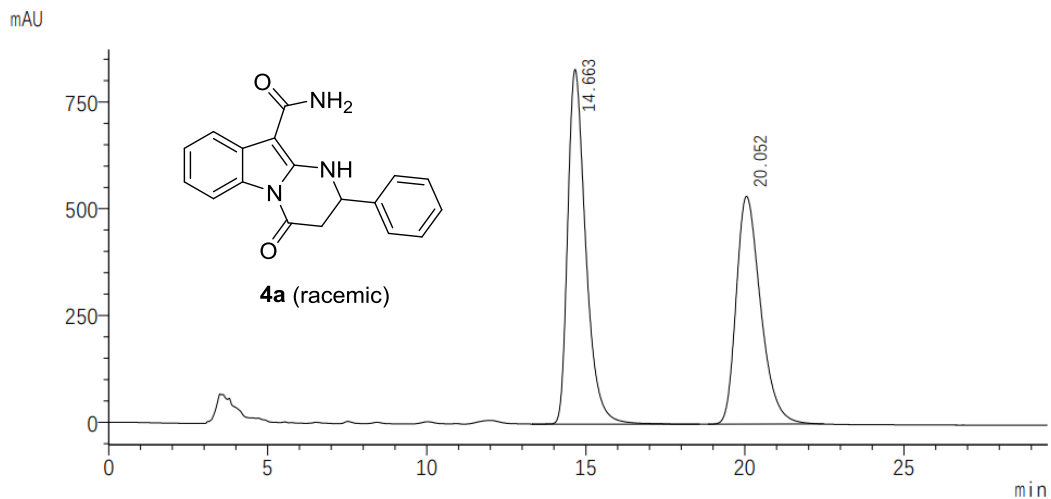

PDA Ch1 254nm

| Peak# | Ret. Time [min] | Area [mAU*s] | Height [mAU] | Area % | Hight % |
|-------|-----------------|--------------|--------------|--------|---------|
| 1     | 14.663          | 32768039     | 830254       | 53.474 | 60.879  |
| 2     | 20.052          | 28509975     | 533513       | 46.526 | 39.121  |

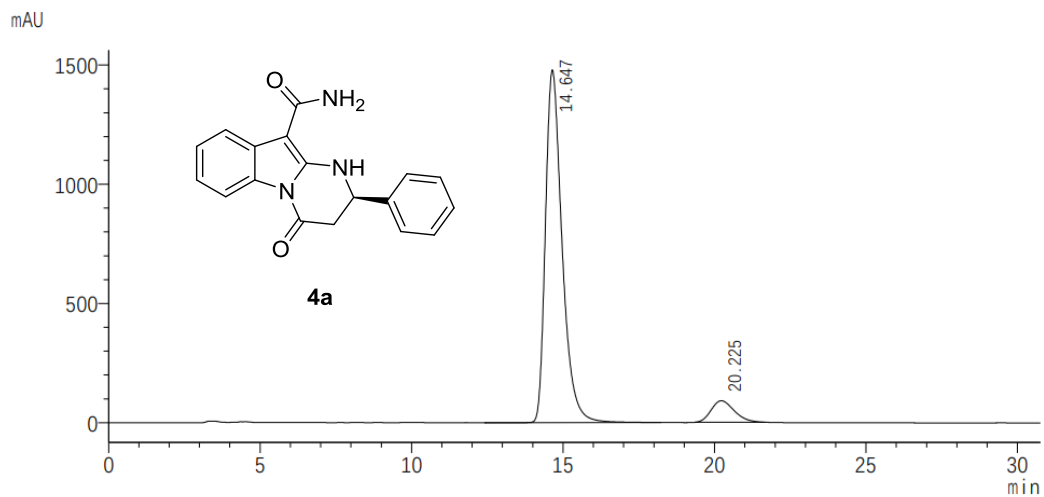

PDA Ch1 254nm

| Peak# | Ret. Time [min] | Area [mAU*s] | Height [mAU] | Area % | Hight % |
|-------|-----------------|--------------|--------------|--------|---------|
| 1     | 14.647          | 56533798     | 1479151      | 92.166 | 94.236  |
| 2     | 20.225          | 4805098      | 90479        | 7.834  | 5.764   |
